# Supplementary material for: How is implementation research applied to advance health in low-income and middle-income countries?
Source: PubMed Central journal article supplement — BMJ Glob Health. 2019 Mar 7;4(2):e001257. doi: 10.1136/bmjgh-2018-001257 (PMC6441291; doi:10.1136/bmjgh-2018-001257), 2019-03-07
Supplement: bmjgh-2018-001257supp002.pdf [file bmjgh-2018-001257supp002.pdf]

| AUTHOR                                                                                                                                                                                                                                                                                                                                                                                                                                | YEAR | TITLE                                                                                                                                                                                                | JOURNAL AND ISSUE                                                    |
|---------------------------------------------------------------------------------------------------------------------------------------------------------------------------------------------------------------------------------------------------------------------------------------------------------------------------------------------------------------------------------------------------------------------------------------|------|------------------------------------------------------------------------------------------------------------------------------------------------------------------------------------------------------|----------------------------------------------------------------------|
|                                                                                                                                                                                                                                                                                                                                                                                                                                       |      | Universal financial protection through National Health Insurance: A stakeholder analysis of the                                                                                                      | Health Policy and Planning 28(3): 263-278.                           |
| Abihiro, G. A. and McIntyre, D.                                                                                                                                                                                                                                                                                                                                                                                                       | 2013 | A stakeholder analysis of the                                                                                                                                                                        |                                                                      |
| Abramsky, T., Devries, K., Kiss, L., Francisco, L., Nakuti, J., Musuya, T., Kyegombe, N., Starmann, E., Abramsky, T., Devries, K., Kiss, L., Nakuti, J., Kyegombe, N., Starmann, E., Cundill, B., Francisco, L., Kaye, D., Musuya, Achonduh, O. A., Mbacham, W. F., Mangham-Jefferies, L., Cundill, B., Chandler, C., Pamen-Ngako, J., Lele, A. K., Ndong, I. C., Adinma, E. D., Brian-Dadinma, J. I., Obionu, C. C. and Asuzu, M. C. | 2012 | A community mobilisation intervention to prevent violence against women and reduce HIV/AIDS Findings from the SASA! Study: A cluster randomized controlled trial to assess the impact of a community | Trials 13.                                                           |
| Adongo, P. B., Phillips, J. F., Aikins, M., Arhin, D. A., Schmitt, M., Nwameme, A. U., Tabong, P. T. N. and Binka, F. N.                                                                                                                                                                                                                                                                                                              | 2014 | mobilization intervention to Designing and implementing interventions to change clinicians' practice in the management of                                                                            | BMC Medicine 12(1).                                                  |
| Afaghi, A., Haj Agha Mohamadi, A. A., Ziaee, A. and Sarchami, R.                                                                                                                                                                                                                                                                                                                                                                      | 2014 | uncomplicated malaria: Lessons Effect of government-community                                                                                                                                        | Malaria Journal 13(1).                                               |
| Afework, M. F., Admassu, K., Mekonnen, A., Hagos, S., Asegid, M. and Ahmed, S.                                                                                                                                                                                                                                                                                                                                                        | 2011 | healthcare co-financing on maternal Does the design and implementation of proven                                                                                                                     | West African Journal of Medicine 30(1): 35-41.                       |
| Ager, A., Akesson, B., Stark, L., Flouri, E., Okot, B., McCollister, F. and Boothby, N.                                                                                                                                                                                                                                                                                                                                               | 2014 | innovations for delivering basic primary health care services in rural                                                                                                                               | Health Research Policy and Systems 12(1).                            |
| Agrawal, C. S. and Karki, P.                                                                                                                                                                                                                                                                                                                                                                                                          | 2012 | Effect of an integrated case-based nutrition curriculum on medical                                                                                                                                   | Global journal of health science 4(1): 112-117.                      |
| Agurto, I., Sandoval, J., De La Rosa, M. and Guardado, M.                                                                                                                                                                                                                                                                                                                                                                             | 2014 | Effect of an innovative community based health program on maternal health service utilization in north                                                                                               | Reproductive Health 11(1).                                           |
| Ahmed, S. and Khan, M. M.                                                                                                                                                                                                                                                                                                                                                                                                             | 2011 | The impact of the school-based Psychosocial Structured Activities (PSSA) program on conflict-affected                                                                                                | Journal of Child Psychology and Psychiatry and Allied Disciplines    |
| Ahn, M., Herman, A. and Damonti, J.                                                                                                                                                                                                                                                                                                                                                                                                   | 2011 | Evolution of the second medical school in Nepal: A case study                                                                                                                                        | Medical Teacher 21(2): 204-206.                                      |
| Alabi, O., Doctor, H. V., Afenyadu, G. Y. and Findley, S. E.                                                                                                                                                                                                                                                                                                                                                                          | 1999 | Improving cervical cancer prevention in a developing country                                                                                                                                         | International Journal for Quality in Health Care, Social Science and |
| Aldinger, C., Zhang, X. W., Liu, L. Q., Guo, J. X., Yu Sen, H. and Aldinger, C., Zhang, X. W., Liu, L. Q., Pan, X. D., Yu, S. H., Jones, J. and Kass, J.                                                                                                                                                                                                                                                                              | 2011 | Is demand-side financing equity enhancing? Lessons from a maternal Public-private partnerships in health care for developing                                                                         | Medicine 72(10): 1704-Managed care quarterly 8(4): 65-72.            |
|                                                                                                                                                                                                                                                                                                                                                                                                                                       | 2000 | Lessons learned from setting up the Nahuche health and demographic                                                                                                                                   |                                                                      |
|                                                                                                                                                                                                                                                                                                                                                                                                                                       | 2014 | surveillance system in the                                                                                                                                                                           | Global Health Action 7(1).                                           |
|                                                                                                                                                                                                                                                                                                                                                                                                                                       | 2008 | Strategies for implementing Health-Promoting Schools in a province in                                                                                                                                | Promotion & education 15(1): 24-29.                                  |
|                                                                                                                                                                                                                                                                                                                                                                                                                                       | 2008 | Changes in attitudes, knowledge and behavior associated with implementing a comprehensive                                                                                                            | Health Education Research 23(6): 1049-1067.                          |

|                                                                                                                                                                                                                  |      |                                                                                                                                                                                                                                    |                                                                                                                                                              |
|------------------------------------------------------------------------------------------------------------------------------------------------------------------------------------------------------------------|------|------------------------------------------------------------------------------------------------------------------------------------------------------------------------------------------------------------------------------------|--------------------------------------------------------------------------------------------------------------------------------------------------------------|
| Alehagen, S. A., Finnström, O., Hermansson, G. V., Somasundaram, K. V., Bangal, V. Alemayehu, Y. K., Bushen, O. Y. and Muluneh, A. T.                                                                            | 2012 | Nurse-based antenatal and child health care in rural India, implementation and effects - an Evaluation of HIV/AIDS clinical care quality: The case of a referral How to establish a successful revolving drug fund: The experience | Rural and Remote Health 12(3).<br>International Journal for Quality in Health Care Bulletin of the World Health Organization Public Health 120(1): 50-57.    |
| Ali, G. K. M.                                                                                                                                                                                                    | 2009 | Emergency medical services in Islamabad, Pakistan: A public-Successful implementation of the world health organization hand                                                                                                        | Infection Control and Hospital Epidemiology 31(2): 133-141.                                                                                                  |
| Ali, M., Miyoshi, C. and Ushijima, H.                                                                                                                                                                            | 2006 | hygiene improvement strategy in a Bilateral environmental and occupational health program with                                                                                                                                     | International Journal of Hygiene and Environmental Health Torture : quarterly journal on rehabilitation of torture victims and Pediatrics 129(1): e106-e112. |
| Allegranzi, B., Sax, H., Bengaly, L., Richet, H., Minta, D. K., Chraiti, M. N., Sokona, F. M., Gayet-Allred, M., Campolucci, S., Falk, H., Ganguly, N. K., Saiyed, H. N. and Shah, B.                            | 2010 | India                                                                                                                                                                                                                              | Global journal of health science 6(3): 82-89.                                                                                                                |
| Al-Saffar, S.                                                                                                                                                                                                    | 2007 | Integrating rehabilitation of torture victims into the public health of Iraq                                                                                                                                                       | PLoS ONE 7(10).                                                                                                                                              |
| Al-sheyab, N., Gallagher, R., Crisp, J. and Shah, S.                                                                                                                                                             | 2012 | Peer-led education for adolescents with asthma in Jordan: A cluster-The National Health Insurance Scheme (NHIS) in the Dormaa                                                                                                      | BMC Public Health 12(1). Culture, Health and Sexuality 14(4): 365-378. Transactions of the Royal Society of Tropical Medicine and Hygiene                    |
| Amo, T.                                                                                                                                                                                                          | 2014 | Access to Artemisinin-Combination Therapy (ACT) and other Anti-Decision support system (DSS) for prevention of cardiovascular disease                                                                                              |                                                                                                                                                              |
| Amuasi, J. H., Diap, G., Nguah, S. B., Karikari, P., Boakye, I., Anchala, R., Pant, H., Prabhakaran, D. and Franco, O. H.                                                                                        | 2012 | (CVD) among hypertensive (HTN) Testing differences: The implementation of Western HIV Delivering TB/HIV services in Ghana: A comparative study of service delivery models                                                          |                                                                                                                                                              |
| Angotti, N.                                                                                                                                                                                                      | 2012 | Integrated Management of Childhood Illness (IMCI) in Bangladesh: Early findings from a                                                                                                                                             | Lancet 364(9445): 1595-1602.                                                                                                                                 |
| Ansa, G. A., Walley, J. D., Siddiqi, K. and Wei, X.                                                                                                                                                              | 2014 | A training programme to build cancer research capacity in low- and Ineffective pictorial health warnings on tobacco products: lessons learnt                                                                                       | Bulletin of the World Health Organization Indian journal of public health 56(1): 61-64.                                                                      |
| Arifeen, S. E., Blum, L. S., Emdadul Hoque, D. M., Chowdhury, E. K., Khan, R., Arnold, L. D., Barnoya, J., Gharzouzi, E. N., Benson, P. and Arora, M., Tewari, A., Nazar, G. P., Gupta, V. K. and Shrivastav, R. | 2012 | Costs, equity, efficiency and feasibility of identifying the poor in Ghana's National Health Insurance                                                                                                                             | Tropical Medicine and International Health 17(1): 43-51.                                                                                                     |
| Aryeetey, G. C., Jehu-Appiah, C., Spaan, E., Agyepong, I. and Baltussen, R.                                                                                                                                      | 2012 | Implementing a simplified neonatal resuscitation protocol-helping babies breathe at birth (HBB) - at a                                                                                                                             | BMC Pediatrics 12.                                                                                                                                           |

|                                                                                                                                                                                                                                                                                                               |                                                                                                                                                                                                   |                                                                                           |
|---------------------------------------------------------------------------------------------------------------------------------------------------------------------------------------------------------------------------------------------------------------------------------------------------------------|---------------------------------------------------------------------------------------------------------------------------------------------------------------------------------------------------|-------------------------------------------------------------------------------------------|
| Assefa, Y., Alebachew, A., Lera, M., Lynen, L., Wouters, E. and Assefa, Y., Lynen, L., Wouters, E., Rasschaert, F., Peeters, K. and Atherton, F., Mbekem, G. and Nyalusi, I.                                                                                                                                  | Scaling up antiretroviral treatment and improving patient retention in                                                                                                                            | Globalization and Health 10(1).                                                           |
| Attanasio, O. P., Fernández, C., Fitzsimons, E. O. A., Grantham-McGregor, S. M., Meghir, C. and Awoonor-Williams, J. K., Feinglass, E. S., Tobey, R.,                                                                                                                                                         | 2014 How to improve patient retention in an antiretroviral treatment program                                                                                                                      | BMC Health Services Research 14.                                                          |
| Axelsson, H., Bales, S., Minh, P. D., Ekman, B. and Gerdtham, U. G.                                                                                                                                                                                                                                           | 1999 Improving service quality: Experience from the Tanzania Family                                                                                                                               | International Journal for Quality in Health Care                                          |
| Ayanniyi, A. A.                                                                                                                                                                                                                                                                                               | 2014 Using the infrastructure of a conditional cash transfer program to deliver a scalable integrated early                                                                                       | BMJ (Online) 349.                                                                         |
| Bacon, K. M., Shah, M., Taylor, L., Macatangay, B. J. C., Veldkamp, P. and Belizario Jr, V. Y.                                                                                                                                                                                                                | 2004 Bridging the gap between evidence-based innovation and national Health financing for the poor produces promising short-term effects on utilization and out-of-Community eye health module in | West African Journal of Medicine 28(4): 245-248.                                          |
| Bagayoko, C. O., Dufour, J. C., Chaacho, S., Bouhaddou, O. and Baizhumanova, A., Nishimura, A., Ito, K., Sakamoto, J., Baker, U., Tomson, G., Somé, M., Kouyaté, B., Williams, J., Mpembeni, R., Massawe, S., Bakibinga, P., Ettarh, R., Ziraba, A. K., Kyobutungi, C., Kamande, E., Ngomi, N. and Osindo, J. | 2009 West Africa: The trainee Assessment of a school-based mass treatment for soil-transmitted helminth infections in Capiz, the                                                                  | Southeast Asian Journal of Tropical Medicine and Public Health 43(3): 589-                |
| Balaji, M., Chatterjee, S., Koschorke, M., Rangaswamy, T., Chavan, A., Dabholkar, H.,                                                                                                                                                                                                                         | 2010 Open source challenges for hospital information system (HIS) in Effectiveness of communication campaign on iron deficiency anemia                                                            | BMC Medical Informatics and Decision Making                                               |
| Banchani, E. and Tenkorang, E. Y.                                                                                                                                                                                                                                                                             | 2010 'How to know what you need to do': A cross-country comparison of                                                                                                                             | BMC Blood Disorders 10.                                                                   |
| Banu Rekha, V. V., Jagarajamma, K., Wares, F., Chandrasekaran, V.                                                                                                                                                                                                                                             | 2012 maternal health guidelines in The effect of enhanced public - private partnerships on Maternal, Newborn and child Health Services                                                            | Implementation Science 7(1).                                                              |
| Baqui, A. H., Rosecrans, A. M., Williams, E. K., Agrawal, P. K., Ahmed, S., Darmstadt, G. L., Kumar, V., Kiran, U., Panwar, D., Baqui, A. H., El-Arifeen, S., Darmstadt, G. L., Ahmed, S., Williams, E. K., Seraji, H. R., Mannan, I., Rahman, S., Shah, R.,                                                  | 2014 The development of a lay health worker delivered collaborative community based intervention for                                                                                              | BMJ Open 4(10).                                                                           |
| Baral, G.                                                                                                                                                                                                                                                                                                     | 2012 Implementation challenges of maternal health care in Ghana: The Contact screening and chemoprophylaxis in India's Revised                                                                    | BMC Health Services Research 12(1).                                                       |
|                                                                                                                                                                                                                                                                                                               | 2014 NGO facilitation of a government community-based maternal and neonatal health programme in rural                                                                                             | BMC Health Services Research 14.                                                          |
|                                                                                                                                                                                                                                                                                                               | 2009 India: Improvements in equity Effect of community-based newborn-care intervention package implemented through two service-                                                                   | International Journal of Tuberculosis and Lung Health Policy and Planning 23(4): 234-243. |
|                                                                                                                                                                                                                                                                                                               | 2008 India: Improvements in equity Effect of community-based newborn-care intervention package implemented through two service-                                                                   | The Lancet, 371(9628), 1936-1944                                                          |
|                                                                                                                                                                                                                                                                                                               | 2008 An assessment of the safe delivery incentive program at a tertiary level                                                                                                                     | Journal of Nepal Health Research Council 10(21):                                          |

- Barasa, E. W., Ayieko, P., Cleary, S. and English, M.  
 Barreto, M. L., Genser, B., Strina, A., Teixeira, M. G., Assis, A. M. O., Rego, R. F., Teles, C. A., Prado, M. Barua, A., Waghmare, R. and Venkiteswaran, S.  
 Bassili, A., Zaki, A., Zaher, S. R., El-Sawy, I. H., Ahmed, M. H., Omar, M., Omar, T., Bedwani, R. N., Davies, C. and Tognoni, G.  
 Bates, I., Bekoe, V. and Asamo-Adju, A.  
 Behets, F., Mutombo, G. M., Edmonds, A., Dulli, L., Belting, M. T., Kapinga, M., Pantazis, A.,
- Belaid, L. and Ridde, V.  
 Beletsky, L., Thomas, R., Smelyanskaya, M., Artamonova, I., Shumskaya, N.,
- Bell, S., Passano, P., Bohl, D. D., Islam, A. and Prata, N.  
 Bemelmans, M., Van Den Akker, T., Pasulani, O., Tayub, N. S., Hermann, K., Mwagomba, B., Bennett, S., George, A., Rodriguez, D., Shearer, J., Diallo, B., Konate, M., DalGLISH, S., Juma, Bergh, A. M., Manu, R., Davy, K., van Rooyen, E., Asare, G. Q., Williams, J. K. A., Dedzo, M., Bergh, A. M., Manu, R., Davy, K., Van Rooyen, E., Quansah Asare, G., Awoonor-Williams, J., Dedzo, Bernabe-Ortiz, A., Diez-Canseco, F., Gilman, R. H., Cárdenas, M. K.,
- Besstremyannaya, G.*
- Bhengu, B. R.*  
 Bhutta, Z. A., Memon, Z. A., Soofi, S., Salat, M. S., Cousens, S.
- A multifaceted intervention to improve the quality of care of Impact of a citywide sanitation program in Northeast Brazil on intestinal parasites infection in Implementing reproductive and child health services in rural Quality of care of children with chronic diseases in Alexandria, Egypt: the models of asthma, type I diabetes, epilepsy, and rheumatic Improving the accuracy of malaria-related laboratory tests in Ghana Reducing vertical HIV transmission in Kinshasa, Democratic Republic of Congo: Trends in HIV prevalence and An implementation evaluation of a policy aiming to improve financial access to maternal health care in Policy reform to shift the health and human rights environment for vulnerable groups: the case of Training traditional birth attendants on the use of misoprostol and a blood measurement tool to prevent Keeping health staff healthy: Evaluation of a workplace initiative to reduce morbidity and mortality Policy challenges facing integrated community case management in Sub-Saharan Africa Translating research findings into practice - the implementation of kangaroo mother care in Ghana Progress with the implementation of kangaroo mother care in four regions in Ghana Launching a salt substitute to reduce blood pressure at the *Micro data assessment of Russian drug benefit monetization An investigation into the level of empowerment of rural women in* Implementing community-based perinatal care: Results from a pilot
- 2012  
 2010  
 2003  
 2000  
 2004  
 2009  
 2012  
 2012  
 2014  
 2011  
 2014  
 2012  
 2013  
 2014  
 2009  
 2010  
 2008
- PLoS Medicine 9(6): 13.  
 Environmental Health Perspectives 118(11): 1637-1642.  
 Reproductive Health Matters 11(21): 140-149.  
 Pediatrics 106(1).  
 Malaria Journal 3.  
 AIDS Care - Psychological and Socio-Medical Aspects of AIDS/HIV 21(5): 583-  
 BMC Pregnancy and Childbirth 12.  
 Health and human rights 14(2): 34-48.  
 Journal of Health, Population and Nutrition 32(1): 118-129.  
 Journal of the International AIDS Society 14(1).  
 Tropical medicine & international health : TM & IH 19(7): 872-882.  
 Implementation Science 7(1).  
 Ghana medical journal 47(2): 57-63.  
 Trials 15(1).  
 Journal of Health, Organisation and Curationis 33(2): 4-12.  
 Bulletin of the World Health Organization

- Blanchet, K., Gordon, I., Gilbert, C. E., Wormald, R. and Awan, H. 2012 How to achieve universal coverage of cataract surgical services in developing countries: Lessons from Challenging the stigmatization of female sex workers through a community-led structural Evaluation of the role of school children in the promotion of point-of-use water treatment and The effects of performance incentives on the utilization and Design, implementation and evaluation of a national campaign to distribute nine million free LLINs to Evaluating treatment of Axis I mental health disorders in Aceh, A comprehensive review of the policy and programmatic response Assessing the elimination of user fees for delivery services in Laos
- Ophthalmic Epidemiology 19(6): 329-339.  
AIDS Care - Psychological and Socio-Medical Aspects of AIDS/HIV 22(SUPPL. 2): American Journal of Tropical Medicine and Hygiene 82(4): 664-671.  
Social Science and Medicine 123: 96-104.  
Malaria Journal 10.  
Psychiatrist 35(7): 248-255.  
Ghana medical journal 46(2 Suppl): 69-78.  
PLoS ONE 9(3).  
International Journal of Injury Control and Safety Promotion 19(2): 123-  
Bulletin of the World Health Organization
- Blankenship, K. M., Biradavolu, M. R., Jena, A. and George, A. 2010
- Blanton, E., Ombeki, S., Oluoch, G. O., Mwaki, A., Wannemuehler, K. and Quick, R. 2010
- Bonfrer, I., Van de Poel, E. and Van Doorslaer, E. 2014
- Bonner, K., Mwita, A., McElroy, P. D., Omari, S., Mzava, A., Lengeler, C., Kaspar, N., Nathan, Boothby, N., Veatch, M. and Pentes, M. 2011
- Bosu, W. K. 2012
- Boudreaux, C., Chanthala, P. and Lindelow, M. 2014
- Boufous, S., Ali, M., Nguyen, H. T., Stevenson, M., Vu, T. C., Nguyen, D. T. Y., Ivers, R., Pham, Boyer, S., Marcellin, F., Ongolo-Zogo, P., Abega, S. C., Boyer, S., Protopopescu, C., Marcellin, F., Carrieri, M. P., Koulla-Shiro, S., Moatti, J. P. and Brenner, J. L., Kabakyenga, J., Kyomuhangi, T., Wotton, K. A., Pim, C., Ntaro, M., Bagenda, F. N., Gad, N. R., Godel, J., Kayizzi, 2012
- Child injury prevention in Vietnam: Achievements and challenges  
Financial barriers to HIV treatment in Yaounde, Cameroon: First results  
Performance of HIV care decentralization from the patient's perspective: Health-related quality Can volunteer community health workers decrease child morbidity and mortality in southwestern Uganda? An impact evaluation  
Building social capital in post-conflict communities: Evidence Improving quality and efficiency of facility-based child health care  
Toward greater inclusion: Lessons from Peru in confronting challenges of multi-sector collaboration  
Assessing the acceptability, service delivery requirements, and use-effectiveness of the diaphragm in Impact of implementation of free high-quality health care on health facility attendance by sick children
- Malari Journal 10.  
Psychiatrist 35(7): 248-255.  
Ghana medical journal 46(2 Suppl): 69-78.  
PLoS ONE 9(3).  
International Journal of Injury Control and Safety Promotion 19(2): 123-  
Bulletin of the World Health Organization  
Health Policy and Planning 27(4): 301-315.  
PLoS ONE 6(12).  
Social Science and Medicine 68(5): 885-893.  
Health Policy and Planning 20(SUPPL. 1):  
Revista Panamericana de Salud Publica/Pan American Journal of  
Contraception 63(5): 267-275.  
Tropical Medicine and International Health 16(6): 711-720.
- Brune, N. E. and Bossert, T. 2009
- Bryce, J., Gouws, E., Adam, T., Black, R. E., Schellenberg, J. A., 2005
- Buffardi, A. L., Cabello, R. and Garcia, P. J. 2012
- Bulut, A., Ortayli, N., Ringheim, K., Cottingham, J., Farley, T. M. M., Peregoudov, A., Joanis, C., Burgert, C. R., Bigogo, G., Adazu, K., Odhiambo, F., Buehler, J., Breiman, R. F., Laserson, K., 2011

|                                                                                                                                                                    |      |                                                                                                                                                                                                           |                                                                                  |
|--------------------------------------------------------------------------------------------------------------------------------------------------------------------|------|-----------------------------------------------------------------------------------------------------------------------------------------------------------------------------------------------------------|----------------------------------------------------------------------------------|
| Burlew, R., Puckett, A., Bailey, R., Caffrey, M. and Brantley, S.                                                                                                  | 2014 | Assessing the relevance, efficiency, and sustainability of HIV/AIDS in-Learning from developing countries in strengthening health systems: An evaluation of personal and professional impact among global | Human resources for health 12: 20.                                               |
| Busse, H., Aboneh, E. A. and Tefera, G.                                                                                                                            | 2014 | Dramatic and sustained increase in HIV-testing rates among antenatal attendees in Eastern Uganda after a policy change from voluntary                                                                     | Globalization and Health 10(1).                                                  |
| Byamugisha, R., Tylleskär, T., Kagawa, M. N., Onyango, S., Karamagi, C. A. and Tumwine, J. K.                                                                      | 2010 | Feasibility and benefits of scaling up antiretroviral treatment provision with the 2010 WHO antiretroviral                                                                                                | BMC Health Services Research 10.                                                 |
| Bygrave, H., Saranchuk, P., Makakole, L. and Ford, N.                                                                                                              | 2012 | The accountability for reasonableness approach to guide priority setting in health systems                                                                                                                | International Health 4(3): 170-175.                                              |
| Byskov, J., Marchal, B., Maluka, S., Zulu, J. M., Bukachi, S. A., Hurtig, A. K., Blystad, A., Caffrey, P., Weiss, E., Wood, L., Connor, E., Orza, L. and Trasi, R. | 2014 | Engaging parliamentarians as advocates for women's health: How can community health programmes build enabling environments for transformative                                                             | Health Research Policy and Systems 12(1).<br>Global Public Health 4(3): 271-283. |
| Campbell, C. and Cornish, F.                                                                                                                                       | 2012 | Newborn care training of midwives and neonatal and perinatal                                                                                                                                              | AIDS and Behavior 16(4): 847-857.                                                |
| Carlo, W. A., McClure, E. M., Chomba, E., Chakraborty, H., Carrin, G., Ron, A., Hui, Y., Hong, W., Tuohong, Z., Licheng, Z., Shuo, Z., Yide, Y., Jiaying, C.,      | 2010 | The reform of the rural cooperative medical system in the People's Republic of China: Interim                                                                                                             | Pediatrics 126(5): e1064-e1071.                                                  |
| Carvalho, N., Thacker, N., Gupta, S. S. and Salomon, J. A.                                                                                                         | 1999 | More evidence on the impact of India's conditional cash transfer program, Janani Suraksha Yojana: Quasi-experimental evaluation of                                                                        | Social Science and Medicine 48(7): 961-972.                                      |
| Castro, M. C., Tsuruta, A., Kanamori, S., Kannady, K. and Chacón, L., Lainez, M., Rosales, E., Mercado, M. and Caminero, J.                                        | 2014 | Community-based environmental management for malaria control: Evolution in the resistance of                                                                                                              | PLoS ONE 9(10).                                                                  |
| Chaki, P. P., Kannady, K., Mtasiwa, D., Tanner, M., Mshinda, H., Kelly, A. H. and Chakrapani, V., Newman, P. A., Shunmugam, M., Kurian, A. K.                      | 2009 | Mycobacterium tuberculosis to anti-Institutional evolution of a community-based programme for malaria control through larval                                                                              | Malaria Journal 8(1).<br>International Journal of Tuberculosis and Lung          |
| Chanda, P., Hamainza, B., Mulenga, S., Chalwe, V., Msiska, C. and Chizema-Kawesha, E.                                                                              | 2009 | Barriers to free antiretroviral treatment access for female sex                                                                                                                                           | Malaria Journal 13(1).<br>AIDS Patient Care and STDs 23(11): 973-980.            |
| Chandani, Y. and Breton, G.                                                                                                                                        | 2009 | Early results of integrated malaria control and implications for the management of fever in under-five                                                                                                    | Malaria Journal 8(1).                                                            |
| Chankova, S., Hatt, L. and Musange, S.                                                                                                                             | 2001 | Contraceptive security, information flow, and local adaptations: family                                                                                                                                   | Afr Health Sci 1(2): 73-82.                                                      |
|                                                                                                                                                                    | 2012 | A community-based approach to promote household water                                                                                                                                                     | Journal of Water and Health 10(1): 116-129.                                      |

- Charles, M. P., Kweka, E. J., Mahande, A. M., Barongo, L. R., Shekalaghe, S., Nkya, H. M., Chasombat, S., Lertpiriyasuwat, C., Thanprasertsuk, S., Suebsaeng, L. and Lo, Y. R. 2009 Evaluation of uptake and attitude to voluntary counseling and testing among health care professional The National Access to Antiretroviral Program for PHA (NAPHA) in Thailand 2006 Effectiveness of a community-based intervention for people with schizophrenia and their caregivers in South Africa, 2011 Survey of isoniazid preventive therapy in South Africa, 2011 Coverage, quality of and barriers to postnatal care in rural Hebei, China: New integrated strategy emphasizing infection source control to curb schistosomiasis 2014 Universal combination antiretroviral regimens to prevent mother-to-child transmission of HIV 2014 Enhancing schistosomiasis control strategy for Zimbabwe: Building on Acceptability and challenges of implementing voluntary counselling and testing (VCT) in rural Zimbabwe: Incremental health system reform policy: Ecuador's law for the Implementation of a national anti-tuberculosis drug resistance survey 2008 in Tanzania 2010 Acceptability of universal screening for intimate partner violence in voluntary HIV testing and Impact of a participatory intervention with women's groups on psychological distress among 2014 Cost-effectiveness of water quality interventions for preventing The impact on child wasting of a capacity building project implemented by community and 2014 Feasibility of Distributing Rapid Diagnostic Tests for Malaria in the Counsellor-delivered HIV risk reduction intervention addresses safer sex barriers of people living with HIV in KwaZulu-Natal, South 2011
- BMC Public Health 9. Southeast Asian Journal of Tropical Medicine and Public Health 37(4): 704-714. The Lancet 383(9926): 1385-1394. International Journal of Tuberculosis and Lung Disease 14(1): 138-144. BMC Pregnancy and Childbirth 14(1): 1-10. PLoS ONE 9(2): e8158. Bulletin of the World Health Organization 92(8): 582-592. Journal of Parasitology Research 2012. AIDS Care - Psychological and Socio-Medical Aspects of AIDS/HIV 22(1): 81-88. Journal of Ambulatory Care Management 32(2): 107-112. BMC Public Health 8. AIDS Care - Psychological and Socio-Medical Aspects of AIDS/HIV 22(3): 279-288. PLoS ONE 9(10): e108885. Journal of Water and Health 5(4): 599-608. Asia Pacific Journal of Clinical Nutrition 23(1): 105-111. PLoS ONE 7(11): e48888. Psychology and Health 26(12): 1623-1641.
- Chimbari, M. J. 2012
- Chirawu, P., Langhaug, L., Mavhu, W., Pascoe, S., Dirawo, J. and Cowan, F. 2010
- Chiriboga, S. R. 2009
- Chonde, T. M., Doulla, B., Van Leth, F., Mfinanga, S. G., Range, N., Lwilla, F., Mfaume, S. M., Van 2008
- Christofides, N. and Jewkes, R. 2010
- Clarke, K., Azad, K., Kuddus, A., Shaha, S., Nahar, T., Aumon, B. H., Hossen, M. M., Beard, J., Clasen, T., Haller, L., Walker, D., Bartram, J. and Cairncross, S. 2014
- Coghlan, B., Toole, M. J., Chanlivong, N., Kounnavong, S., Vongsaiya, K. and Renzaho, A. 2014
- Cohen, J., Fink, G., Berg, K., Aber, F., Jordan, M., Maloney, K. and Cornman, D. H., Christie, S., Shepherd, L. M., MacDonald, S., Amico, K. R., Smith, L. R., Shuper, P. A., Adelaja, A., 2011

|                                                                                                                                                                                                                                                                                                                                                                                                                                                                                                                                               |                                                                                                                                                                                                                                                                                                                                                                                                                                                                                                                                                                                                                                                                                                                                                                                                                                                                                                                                                                                                                                                                                                                                                                                                                                                                                                                                                                                                                                                                                                                                                                                                                                              |                                                                                                                                                                                                                                                                                                                                                                                                                                                                                                                                                                                                                                                                                                                                                                                                                                                                                                                          |
|-----------------------------------------------------------------------------------------------------------------------------------------------------------------------------------------------------------------------------------------------------------------------------------------------------------------------------------------------------------------------------------------------------------------------------------------------------------------------------------------------------------------------------------------------|----------------------------------------------------------------------------------------------------------------------------------------------------------------------------------------------------------------------------------------------------------------------------------------------------------------------------------------------------------------------------------------------------------------------------------------------------------------------------------------------------------------------------------------------------------------------------------------------------------------------------------------------------------------------------------------------------------------------------------------------------------------------------------------------------------------------------------------------------------------------------------------------------------------------------------------------------------------------------------------------------------------------------------------------------------------------------------------------------------------------------------------------------------------------------------------------------------------------------------------------------------------------------------------------------------------------------------------------------------------------------------------------------------------------------------------------------------------------------------------------------------------------------------------------------------------------------------------------------------------------------------------------|--------------------------------------------------------------------------------------------------------------------------------------------------------------------------------------------------------------------------------------------------------------------------------------------------------------------------------------------------------------------------------------------------------------------------------------------------------------------------------------------------------------------------------------------------------------------------------------------------------------------------------------------------------------------------------------------------------------------------------------------------------------------------------------------------------------------------------------------------------------------------------------------------------------------------|
| Coutinho, S. B., Lira, P. I. C.,<br>Lima, M. C., Frias, P. G.,<br>Eickmann, S. H. and Ashworth, A.<br>Cowan, F. M., Pascoe, S. J. S.,<br>Langhaug, L. F., Dirawo, J.,<br>Chidiya, S., Jaffar, S., Mbizvo, M.,<br>Stephenson, J. M., Johnson, A.<br>Creek, T., Ntumy, R., Mazhani, L.,<br>Moore, J., Smith, M., Han, G.,<br>Shaffer, N. and Kilmarx, P. H.<br>Dadgar, N., Ansari, A., Naleo, T.,<br>Brennan, M., Salama, P., Sadozai,<br>N., Golaz, A., Lievano, F., Jafari,<br>Dangour, A. D., Moreno, X.,<br>Albala, C., Rivera-Marquez, A., | Promotion of exclusive breast-<br>feeding at scale within routine<br>health services: Impact of breast-<br>The Regai Dzive Shiri Project: A<br>cluster randomised controlled trial<br>to determine the effectiveness of a<br>multi-component community-<br>Factors associated with low early<br>uptake of a national program to<br>prevent mother to child<br>Implementation of a mass measles<br>campaign in Central Afghanistan,<br>December 2001 to May 2002<br>Chile's national nutritional<br>supplementation program for older<br>The effect of community-based<br>reproductive health<br>communication interventions on<br>Improved immunization practices<br>reduce childhood hepatitis B<br>The impact of targeted subsidies for<br>facility-based delivery on access to<br>care and equity Evidence from a<br>Reorganization of secondary and<br>tertiary health care levels: Impact on<br>the outcomes of oral cancer<br>Prevention of mother-to-child HIV<br>transmission in resource-poor<br>Implementation of a continuum of<br>care for people living with HIV/AIDS<br>Acceptability of coupling<br>Intermittent Preventive Treatment<br>in infants with the Expanded<br>Promoting contraceptive use among<br>female rural-to-urban migrants in<br>Qingdao, China: A comparative<br>Knowledge, Attitudes, and Practices<br>Related to Uterotonic Drugs during<br>Cholera outbreak in a village in<br>south India - Timely action saved<br>HIV/AIDS knowledge, attitudes,<br>practices and perceptions of rural<br>Utilization of PMTCT services and<br>associated factors among pregnant<br>women attending antenatal clinics | Public Health Nutrition<br>17(4): 948-955.<br><br>Tropical Medicine and<br>International Health<br>13(10): 1235-1244.<br><br>AIDS and Behavior 13(2):<br>356-364.<br>Journal of Infectious<br>Diseases 187(SUPPL. 1):<br>S186-S190.<br>Food and Nutrition<br>Bulletin 26(2): 190-197.<br>International Family<br>Planning Perspectives<br>34(4): 189-197.<br>Vaccine 27(33): 4462-<br>4467.<br><br>Journal of Public Health<br>Policy 33(4): 439-453.<br><br>Brazilian Dental Journal<br>23(3): 241-245.<br>Journal of the American<br>Medical Association<br>Cahiers Sante 19(3): 141-<br>148.<br>Tropical Medicine and<br>International Health<br>17(3): 308-315.<br>European Journal of<br>Contraception and<br>Reproductive Health Care<br><br>PLoS ONE 8(4).<br>Journal of Infection and<br>Public Health 6(1): 35-40.<br>Journal of Advanced<br>Nursing 65(5): 1061-<br><br>BMC Pregnancy and<br>Childbirth 14(1). |
| Daniel, E. E., Masilamani, R. and<br>Rahman, M.<br>Danielsson, N., Fakakovikaetau,<br>T. and Szegedi, E.<br>De Allegri, M., Ridde, V., Louis, V.<br>R., Sarker, M., Tiendrebéogo, J.,<br>Yé, M., Müller, O. and Jahn, A.<br>de Almeida, F. C. S., Casal, C.,<br>Pucca Júnior, G. A., da Silva, D.<br>P., Frias, A. C. and de Araújo, M.<br>De Cock, K. M., Fowler, M. G.,<br>Mercier, E., De Vincenzi, I., Saba,                                                                                                                              | 2014<br><br>2008<br><br>2009<br><br>2003<br><br>2005<br><br>2008<br><br>2009<br><br>2012<br><br>2012<br><br>2000<br><br>2009<br><br>2012<br><br>2012<br><br>2013<br><br>2013<br><br>2009<br><br>2014                                                                                                                                                                                                                                                                                                                                                                                                                                                                                                                                                                                                                                                                                                                                                                                                                                                                                                                                                                                                                                                                                                                                                                                                                                                                                                                                                                                                                                         |                                                                                                                                                                                                                                                                                                                                                                                                                                                                                                                                                                                                                                                                                                                                                                                                                                                                                                                          |
| de Loenzien, M.<br>De Sousa, A., Rabarijaona, L. P.,<br>Ndiaye, J. L., Sow, D., Ndyiae, M.,<br>Hassan, J., Lambo, N.,<br>Decat, P., Zhang, W. H., Delva,<br>W., Moyer, E., Cheng, Y., Wang,<br>Z. J., Lu, C. Y., Wu, S. Z.,<br>Deepak, N. N., Mirzabagi, E.,<br>Koski, A. and Tripathi, V.<br>Deepthi, R., Sandeep, S. R.,<br>Rajini, M., Rajeshwari, H. and<br>Delobelle, P., Rawlinson, J. L.,<br>Ntuli, S., Malatsi, I., Decock, R.                                                                                                        |                                                                                                                                                                                                                                                                                                                                                                                                                                                                                                                                                                                                                                                                                                                                                                                                                                                                                                                                                                                                                                                                                                                                                                                                                                                                                                                                                                                                                                                                                                                                                                                                                                              |                                                                                                                                                                                                                                                                                                                                                                                                                                                                                                                                                                                                                                                                                                                                                                                                                                                                                                                          |
| Deressa, W., Seme, A., Asefa, A.,<br>Teshome, G. and Enqusellassie, F.                                                                                                                                                                                                                                                                                                                                                                                                                                                                        |                                                                                                                                                                                                                                                                                                                                                                                                                                                                                                                                                                                                                                                                                                                                                                                                                                                                                                                                                                                                                                                                                                                                                                                                                                                                                                                                                                                                                                                                                                                                                                                                                                              |                                                                                                                                                                                                                                                                                                                                                                                                                                                                                                                                                                                                                                                                                                                                                                                                                                                                                                                          |



|                                                                                                                                                                     |      |                                                                                                                                                                                                                                                                          |                                                                                                                           |
|---------------------------------------------------------------------------------------------------------------------------------------------------------------------|------|--------------------------------------------------------------------------------------------------------------------------------------------------------------------------------------------------------------------------------------------------------------------------|---------------------------------------------------------------------------------------------------------------------------|
| Desale, A., Taye, B., Belay, G. and Nigatu, A.                                                                                                                      | 2013 | Assessment of laboratory logistics management information system practice for HIV/AIDS and tuberculosis laboratory                                                                                                                                                       | Pan African Medical Journal 15.                                                                                           |
| Desalu, O. O., Onyedum, C. C., Adeoti, A. O., Gundiri, L. B., Fadare, J. O., Adekeye, K. A., Onyeri, K. D. and Fawibe, A. E.                                        | 2013 | Guideline-based COPD management in a resource-limited setting - physicians' understanding, adherence and barriers: A cross-                                                                                                                                              | Primary Care Respiratory Journal 22(1): 79-85.                                                                            |
| Desclaux, A.                                                                                                                                                        | 2013 | When a prevention policy leads to economic vulnerability: The case of Do strategies to improve quality of maternal and child health care in                                                                                                                              | Global Health Promotion 20(SUPPL.1): 39-44.                                                                               |
| Dettrick, Z., Firth, S. and Soto, E. J.                                                                                                                             | 2013 | lower and middle income countries Health governance at local level                                                                                                                                                                                                       | PLoS ONE 8(12).                                                                                                           |
| Devkota, B., Ghimire, J., Devkota, A., Gupta, R. P., Dewing, S., Mathews, C., Cloete, A., Schaay, N., Shah, M., Simbayi, L. and Louw, J.                            | 2013 | from human resource for health From research to practice: Lay adherence counsellors' fidelity to an                                                                                                                                                                      | Journal of Nepal Health Research Council 11(24): AIDS and Behavior 17(9): 2935-2945.                                      |
| Dewing, S., Mathews, C., Schaay, N., Cloete, A., Louw, J. and                                                                                                       | 2012 | evidence-based intervention for Behaviour change counselling for ARV adherence support within Perceptions of intermittent                                                                                                                                                | AIDS and Behavior 16(5): 1286-1294.                                                                                       |
| Diala, C. C., Pennas, T., Marin, C. and Belay, K. A.                                                                                                                | 2013 | preventive treatment of malaria in pregnancy (IPTp) and barriers to                                                                                                                                                                                                      | Malaria Journal 12(1).                                                                                                    |
| Díaz-Monsalve, S. J.                                                                                                                                                | 2004 | The impact of health-management training programs in Latin America on job performance                                                                                                                                                                                    | Cadernos de saude publica / Ministerio da Saude, Fundacao Oswaldo Cruz, Escola Nacional de Saude                          |
| Dicko, A., Sagara, I., Djimdé, A. A., Touré, S. O., Traore, M., Dama, S., Diallo, A. I., Barry, A., Dicko, M., Oni, A. Q. O., Ganivet, S., Kone, S., Pierre, L. and | 2010 | Molecular markers of resistance to sulphadoxine-pyrimethamine one year after implementation of                                                                                                                                                                           | Malaria Journal 9(1).                                                                                                     |
| Ding, H., Sun, X., Chang, W. W., Zhang, L. and Xu, X. P.                                                                                                            | 2013 | Safety of immunization injections in Africa: Not simply a problem of A Comparison of Job Satisfaction of Community Health Workers before                                                                                                                                 | Bulletin of the World Health Organization                                                                                 |
| Ding, Y., Smith, H. J., Fei, Y., Xu, B., Nie, S., Yan, W., Diwan, V. K., Ditlopo, P., Blaauw, D., Bidwell, P. and Thomas, S.                                        | 2013 | and after Local Comprehensive Factors influencing the provision of                                                                                                                                                                                                       | PLoS ONE 8(9).                                                                                                            |
| Ditlopo, P., Blaauw, D., Rispel, L. C., Thomas, S. and Bidwell, P.                                                                                                  | 2013 | public health services by village Analyzing the implementation of the                                                                                                                                                                                                    | Bulletin of the World Health Organization                                                                                 |
| Dixon, J., Luginaah, I. and Mkandawire, P.                                                                                                                          | 2014 | Journal of Public Health Policy 32(SUPPL. 1): S80-                                                                                                                                                                                                                       | Journal of Public Health Policy 32(SUPPL. 1): S80-                                                                        |
| Dixon, J., Tenkorang, E. Y. and Luginaah, I.                                                                                                                        | 2013 | rural allowance in hospitals in North Policy implementation and financial incentives for nurses in South Africa: The National Health Insurance Scheme in Ghana's Upper West Region: A gendered perspective of Ghana's National Health Insurance Scheme: A national level | Global health action 6: 19289. Social Science and Medicine 122: 103-112. BMC International Health and Human Rights 13(1). |

- Djimde, A., Plowe, C. V., Diop, S., Dicko, A., Wellems, T. E. and
- Do, M., Kincaid, D. L. and Figueroa, M. E.
- Dongbo, F., Hua, F., McGowan, P., Yi-e, S., Lizhen, Z., Huiqin, Y., Jianguo, M., Shitai, Z., Yongming, Donmozoun, T. S., Sombie, I. and Meda, N.
- Doocy, S., Tappis, H., Paul, A., Klemm, R. and Funna, S.
- Dramé, F. M., Crawford, E. E., Diouf, D., Beyrer, C. and Baral, S. D.
- du Mortier, S. and Arpagaus, M.
- Du, X., Gao, R., Turnbull, F., Wu, Y., Rong, Y., Lo, S., Billot, L., Hao, Z., Ranasinghe, I., Iedema, R., Kong, L., Hu, D., Lin, S., Shen, W.,
- Dumba, R., Kaddu, J. B. and Wabwire-Mangen, F.
- Dumont, A., Fournier, P., Abrahamowicz, M., Traoré, M., Haddad, S. and Fraser, W. D.
- Durovni, B., Saraceni, V., Moulton, L. H., Pacheco, A. G., Cavalcante, S. C., King, B. S., Cohn, S., Efron, A., Chaisson, R. E. Dutta, P., Khan, A. M., Khan, S. A., Borah, J., Sharma, C. K. and Mahanta, J.
- Dykes, F., Lhussier, M., Bangash, S., Zaman, M. and Lowe, N.
- Dynes, M., Rahman, A., Beck, D., Moran, A., Rahman, A., Pervin, J., Yunus, M., Rashid, M. H., Gazi, T., *Ebenso, J., Muyiwa, L. T. and Ebenso, B. E.*
- Echoka, E., Kombe, Y., Dubourg, D., Makokha, A., Evjen-Olsen, B., Mwangi, M., Byskov, J., Olsen, O.
- Use of antimalarial drugs in Mali: Policy versus reality
- Impacts of four communication programs on HIV testing behavior in South Africa
- Implementation and quantitative evaluation of chronic disease self-management programme in What prevent women for a sustainable use of maternal care in Preventing malnutrition in children under two (PM2A): a case study in A pilot cohort study to assess the feasibility of HIV prevention science research among men who have sex Quality improvement programme on the frontline: An international committee of the Red Cross Hospital quality improvement initiative for patients with acute coronary syndromes in China a cluster randomized, controlled trial Design and implementation of participatory hygiene and sanitation transformation (PHAST) as a strategy Quality of care, risk management, and technology in obstetrics to reduce hospital-based maternal Effect of improved tuberculosis screening and isoniazid preventive therapy on incidence of tuberculosis and death in patients with HIV in Malaria control in a forest fringe area of Assam, India: A pilot study Exploring and optimising maternal and infant nutrition in North West Home-based life saving skills in Matlab, Bangladesh: A process evaluation of a community-based *Self care groups and ulcer prevention in Okegbala, Nigeria* Existence and functionality of emergency obstetric care services at district level in Kenya: Theoretical
- American Journal of Tropical Medicine and AIDS Care - Psychological and Socio-Medical Aspects of AIDS/HIV 26(9): 1109- Bulletin of the World Health Organization 81(3): 174-182. Pan African Medical Journal 18. World health & population 14(4): 12-22. Journal of the International AIDS Society 16 Suppl 3. International Journal for Quality in Health Care 17(4): 293-300. Circulation: Cardiovascular Quality and Outcomes 7(2): 217-226. African Health Sciences 13(2): 512-517. The Lancet 382(9887): 146-157. The Lancet Infectious Diseases 13(10): 852-858. Transactions of the Royal Society of Tropical Medicine and Hygiene Midwifery 28(6): 831-835. Midwifery 27(1): 15-22. *Leprosy Review* 80(2): 187-196. BMC Health Services Research 13(1).

- Ediau, M., Wanyenze, R. K., Machingaidze, S., Otim, G., Olwedo, A., Iriso, R. and Eftekhari, M. B., Falahat, K., Dejman, M., Forouzan, A. S., 2013 Trends in antenatal care attendance and health facility delivery following community and health facility based participatory health 2013 BMC Pregnancy and Childbirth 13.
- Ejigu, T., Woldie, M. and Kifle, Y. 2013 The main advantages of community based participatory health 2013 Global journal of health science 5(3): 28-33.
- Ekouevi, D. K., Kariyare, B. G., Coffie, P. A., Jutand, M. A., Akpadza, K., Lawson-Evi, A., El-Jardali, F., Hammoud, R., Younan, L., Nuwayhid, H. S., Abdallah, N., Alameddine, M., El-Khoury, M., Hatt, L. and Gandaho, T. 2013 Quality of antenatal care services at public health facilities of Bahir-Dar 2013 BMC Health Services Research 13(1).
- Ellard, D., Simkiss, D., Quenby, S., Davies, D., Kandala, N. B., Kamwendo, F., Mhango, C. and O'Hare, J. P. 2013 Feasibility and acceptability of rapid HIV screening in a labour ward in Togo 2013 Journal of the International AIDS Society 15(2).
- Elmardi, K. A., Malik, E. M., Abdelgadir, T., Ali, S. H., Elsyed, A. H., Mudather, M. A., Elhassan, Enarson, P. M., Gie, R. P., Mwansambo, C. C., Maganga, E. 2014 The making of nursing practice Law in Lebanon: A policy analysis case study 2014 Health Research Policy and Systems 12(1).
- Englberger, L., Lorens, A., Pretrick, M., Tara, M. J. and Erdogan, S., Secginli, S., Cosansu, G., Nahcivan, N. O., Esin, M. N., Aktas, E. and Monsen, K. A. 2012 User fee exemptions and equity in access to caesarean sections: An 2012 International Journal for Equity in Health 11(1).
- Erhard, L., Degabriele, J., Naughton, D. and Freeman, M. C. 2012 The impact of training non-physician clinicians in Malawi on maternal and perinatal mortality: a cluster randomised controlled 2012 BMC Pregnancy and Childbirth 12.
- Fairall, L., Bachmann, M. O., Lombard, C., Timmerman, V., Uebel, K., Zwarenstein, M., Bouille, A., Georgeu, D., Colivn, C., Lewin, S., Faris, G., Cornick, Falahat, K., Eftekhari, M. B., Malekafzali, H., Forouzan, A. S. 2009 Feasibility and acceptability of home-based management of malaria strategy adapted to Sudan's 2009 Malaria Journal 8(1).
- Fang, H. and Rizzo, J. A. 2014 Reducing deaths from severe pneumonia in children in Malawi by 2014 PLoS ONE 9(7).
- Fatiregun, A. A., Adeyemo, A. A. and Olowookere, S. A. 2011 Local food policies can help promote local foods and improve 2011 Hawaii medical journal 70(11 Suppl 2): 31-34.
- 2013 Using the omaha system to describe health problems, interventions, and 2013 CIN - Computers Informatics Nursing 31(6): 290-298.
- 2013 outcomes in home care in Istanbul, 2013 Global Public Health 8(9): 1000-1013.
- 2013 Policy and provision of WASH in schools for children with 2013 International Family Planning Perspectives
- 2009 Evaluation of Berhane Hewan: A program to delay child marriage in 2009 The Lancet, 380(9845), 889-898.
- 2012 Task shifting of antiretroviral treatment from doctors to primary-care nurses in South Africa (STRETCH): a pragmatic, parallel, 2012 Journal of the Pakistan Medical Association
- 2013 cluster-randomised trial. 2013 American Journal of Preventive Medicine 37(2)
- 2013 Governance in community based health programmes in I.R of Iran 2013 Vaccine 30(13): 2315-2319.
- 2009 Did Cigarette Vouchers Increase Female Smokers in China? 2009
- 2012 Willingness to receive pandemic influenza A (H1N1) vaccine among 2012

- Feinstein, L., Dimomfu, B. L., Mupenda, B., Duvall, S., Chalachala, J. L., Edmonds, A. Fesenfeld, M., Hutubessy, R. and Jit, M.
- Fiedler, J. L. and Chuko, T.
- Findley, S. E., Uwemedimo, O. T., Doctor, H. V., Green, C., Adamu, Findley, S. E., Uwemedimo, O. T., Doctor, H. V., Green, C., Adamu, F. and Afenyadu, G. Y.
- Fort, M. P., Grembowski, D. E., Verdugo, J. C., Morales, L. C., Arriaga, C. A., Mercer, M. A. and Fottrell, E., Azad, K., Kuddus, A., Younes, L., Shaha, S., Nahar, T., Aumon, B. H., Hossen, M., Beard, J., Hossain, T., Pulkki-Frankenber, E., Buttenheim, A., Sikoki, B. and Suriastini, W.
- Freeman, M. C., Quick, R. E., Abbott, D. P., Ogotu, P. and Rheingans, R.
- Freeman, M. C., Quick, R. E., Abbott, D. P., Ogotu, P. and Rheingans, R.
- Galárraga, O., Sosa-Rubí, S. G., Salinas-Rodríguez, A. and Sesma-Gambhir, R. S., Sohi, R. K., Nanda, T., Sawhney, G. S. and
- García Prado, A. and Cortez, R.
- García, P. J., Cárcamo, C. P., Chiappe, M., Valderrama, M., La Rosa, S., Holmes, K. K., Mabey, D. Gartland, M. G., Chintu, N. T., Li, M. S., Lembalemba, M. K., Mulenga, S. N., Bweupe, M., Gebrehiwot, T., Goicolea, I., Edin, K. and Sebastian, M. S.
- Geller, S., Carnahan, L., Akosah, E., Asare, G., Agyemang, R., Dickson, R., Kapungu, C., Owusu-
- Antenatal and delivery services in Kinshasa, Democratic Republic of Congo: Care-seeking and experiences
- 2013
- Cost-effectiveness of human papillomavirus vaccination in low income countries: The cost of Child Health Days: A case study of Ethiopia's Enhanced Early results of an integrated maternal, newborn, and child health intervention to promote newborn survival in Guatemala: Coverage, quality, and progress of an inclusive primary health care model
- 2013
- 2011
- The effect of increased coverage of participatory women's groups on neonatal mortality in Bangladesh: A cluster randomized trial
- 2013
- Do women increase their use of reproductive health care when it is free? Increasing equity of access to point-of-use water treatment products through social marketing and community-based distribution of health insurance for the poor: Impact on catastrophic and out-of-pocket health expenditure
- 2010
- Impact of school based Oral Health Education programmes in India: A Maternity waiting homes and institutional birth in Nicaragua: Policy options and strategic approaches
- 2012
- Rapid Syphilis Tests as Catalysts for Health Systems Strengthening: A Case Study from Peru
- 2013
- Field effectiveness of combination antiretroviral prophylaxis for the prevention of mother-to-child HIV transmission: Making pragmatic choices: Women's experiences of delivery care in rural Kenya: Community-based distribution of misoprostol to prevent postpartum haemorrhage at home births:
- 2013
- 2012
- 2014
- Tropical Medicine and International Health 18(10): 1211-1221.
- Vaccine 31(37): 3786-3804.
- Health Policy and Planning 23(4): 222-233.
- BMC Public Health 13(1).
- International Journal of Women's Health 5(1): 717-728.
- Revista Panamericana de Salud Publica/Pan American Journal of Health 16(9): 816-825.
- Studies in Family Planning 40(1): 27-38.
- Journal of Water and Health 7(3): 527-534.
- Journal of Water and Health 7(3): 527-534.
- European Journal of Health Economics 11(5): 527-534.
- Journal of Clinical and Diagnostic Research International Journal of Health Planning and Management 27(2): 150-155.
- PLoS ONE 8(6).
- AIDS 27(8): 1253-1262.
- BMC Pregnancy and Childbirth 12.
- BJOG: An International Journal of Obstetrics and Gynaecology 121(3): 319-

|                                                                                                                                                                                                                                                                                                                                                                                                                                                                                                                                                                                                                                                                                                                                                                                                                                                                                                                                                                              |                                                                                                                                                                                                                                                                                                                                                                                                                                                                                                                                                                                                                                                                                                                                                                                                                                                                                                                                                                                                                                                                                                                                                                                                                                                                                                                                                                                                                                                                                       |                                                                                                                                                                                                                                                                                                                                                                                                                                                                                                                                                                                                                                                                         |
|------------------------------------------------------------------------------------------------------------------------------------------------------------------------------------------------------------------------------------------------------------------------------------------------------------------------------------------------------------------------------------------------------------------------------------------------------------------------------------------------------------------------------------------------------------------------------------------------------------------------------------------------------------------------------------------------------------------------------------------------------------------------------------------------------------------------------------------------------------------------------------------------------------------------------------------------------------------------------|---------------------------------------------------------------------------------------------------------------------------------------------------------------------------------------------------------------------------------------------------------------------------------------------------------------------------------------------------------------------------------------------------------------------------------------------------------------------------------------------------------------------------------------------------------------------------------------------------------------------------------------------------------------------------------------------------------------------------------------------------------------------------------------------------------------------------------------------------------------------------------------------------------------------------------------------------------------------------------------------------------------------------------------------------------------------------------------------------------------------------------------------------------------------------------------------------------------------------------------------------------------------------------------------------------------------------------------------------------------------------------------------------------------------------------------------------------------------------------------|-------------------------------------------------------------------------------------------------------------------------------------------------------------------------------------------------------------------------------------------------------------------------------------------------------------------------------------------------------------------------------------------------------------------------------------------------------------------------------------------------------------------------------------------------------------------------------------------------------------------------------------------------------------------------|
| George, G. and Rhodes, B.<br>Georgeu, D., Colvin, C. J., Lewin, S., Fairall, L., Bachmann, M. O., Uebel, K., Zwarenstein, M., Girard, A. W., Dzingina, C., Akogun, O., Mason, J. B. and Goicolea, I., Coe, A. B., Hurtig, A. K. and San Sebastian, M.                                                                                                                                                                                                                                                                                                                                                                                                                                                                                                                                                                                                                                                                                                                        | Is there really a pot of gold at the end of the rainbow? Has the occupational specific dispensation, Implementing nurse-initiated and managed antiretroviral treatment (NIMART) in South Africa: a Public health interventions, barriers, and opportunities for Mechanisms for achieving adolescent-friendly services in Addressing maternal healthcare through demand side financial Health gains from solar water disinfection (SODIS): Evaluation of a A tool and index to assess surgical capacity in low income countries: Implementing an integrated nutrition package at large scale in madagascar: The Essential nutrition Evaluating the benefits of incorporating traditional birth attendants in HIV prevention of mother to child transmission service The Mosoriot medical record system: Design and initial implementation of an outpatient Cost-effectiveness analysis of three health interventions to prevent Household ownership and use of insecticide treated nets among target groups after implementation of a national voucher programme in Vouchers for scaling up insecticide-treated nets in Tanzania: Methods for monitoring and evaluation of a Mass Treatment with Azithromycin for Trachoma: When Is One Round Enough? Results from the PRET Trial in The Gambia Process evaluation of the Intervention with Microfinance for AIDS and Gender Equity (IMAGE) in The health benefits of social mobilization: experiences with community-based Integrated | BMC Public Health 12(1).<br>Implementation Science 7(1).<br>Food and nutrition bulletin 33(2 Suppl): S51-<br>Global health action 5.<br>BMC Health Services Research 12(1).<br>Journal of Water and Health 8(4): 779-796.<br>World Journal of Surgery 36(8): 1970-1977.<br>Food and Nutrition Bulletin 30(3): 233-244.<br>African journal of reproductive health 18(1): 27-34.<br>International Journal of Medical Informatics 60(1): 21-28.<br>International Health 4(1): 38-46.<br>BMJ (Online) 339(7712): 93-95.<br>BMC Public Health 8.<br>PLoS Neglected Tropical Diseases 7(6).<br>Health Education Research 25(1): 27-40.<br>Promotion & education 15(2): 15-20. |
| Gopalan, S. S. and Durairaj, V.<br>Graf, J., Togouet, S. Z., Kemka, N., Niyitegeka, D., Meierhofer, R.<br>Groen, R. S., Kamara, T. B., Dixon-Cole, R., Kwon, S., Kingham, T. P. Guyon, A. B., Quinn, J. V., Hainsworth, M., Ravonimanantsoa, P., Hamela, G., Kabondo, C., Tembo, T., Zimba, C., Kamanga, E., Mofolo, I., Bulla, B., Sellers, C., Nakanga, R. C., Lee, C., Hannan, T. J., Rotich, J. K., Odero, W. W., Menya, D., Esamai, F., Einterz, R. M., Sidle, Hansen, K. S., Ndyomugenyi, R., Magnussen, P. and Clarke, S. E. Hanson, K., Marchant, T., Nathan, R., Mponda, H., Jones, C., Bruce, J., Mshinda, H. and Schellenberg, J. A. Hanson, K., Nathan, R., Marchant, T., Mponda, H., Jones, C., Bruce, J., Stephen, G., Harding-Esch, E. M., Sillah, A., Edwards, T., Burr, S. E., Hart, J. D., Joof, H., Laye, M., Makalo, P., Manjang, A., Molina, S., Sarr-Hargreaves, J., Hatcher, A., Strange, V., Phetla, G., Busza, J., Kim, J., Watts, C., Morison, L., | 2012<br>2012<br>2012<br>2012<br>2012<br>2010<br>2012<br>2009<br>2014<br>2000<br>2012<br>2009<br>2008<br>2013<br>2010                                                                                                                                                                                                                                                                                                                                                                                                                                                                                                                                                                                                                                                                                                                                                                                                                                                                                                                                                                                                                                                                                                                                                                                                                                                                                                                                                                  | 2012<br>2012<br>2012<br>2012<br>2012<br>2010<br>2012<br>2009<br>2014<br>2000<br>2012<br>2009<br>2008<br>2013<br>2010                                                                                                                                                                                                                                                                                                                                                                                                                                                                                                                                                    |
| Harkins, T., Drasbek, C., Arroyo, J. and McQuestion, M.                                                                                                                                                                                                                                                                                                                                                                                                                                                                                                                                                                                                                                                                                                                                                                                                                                                                                                                      | 2008                                                                                                                                                                                                                                                                                                                                                                                                                                                                                                                                                                                                                                                                                                                                                                                                                                                                                                                                                                                                                                                                                                                                                                                                                                                                                                                                                                                                                                                                                  | 2008                                                                                                                                                                                                                                                                                                                                                                                                                                                                                                                                                                                                                                                                    |

|                                                                                                                                                                                                                                                                                                                                                                                                                                                                                                                                                                                                                                                                                                                                                                                                                                                                                                                                                                                                                                                                                                                                                                                                                                                                                                                                                                                                                                     |                                                                                                                                                                                                                                                                                                                                                                                                                                                                                                                                                                                                                                                                                                                                                                                                                                                                                                                                                                                                                                                                                                                                                                                                                                                                                                                                                                                                                                                                                                  |                                                                                                                                                                                                                                                                                                                                                                                                                                                                                                                                                                                                                                                                                                                                             |
|-------------------------------------------------------------------------------------------------------------------------------------------------------------------------------------------------------------------------------------------------------------------------------------------------------------------------------------------------------------------------------------------------------------------------------------------------------------------------------------------------------------------------------------------------------------------------------------------------------------------------------------------------------------------------------------------------------------------------------------------------------------------------------------------------------------------------------------------------------------------------------------------------------------------------------------------------------------------------------------------------------------------------------------------------------------------------------------------------------------------------------------------------------------------------------------------------------------------------------------------------------------------------------------------------------------------------------------------------------------------------------------------------------------------------------------|--------------------------------------------------------------------------------------------------------------------------------------------------------------------------------------------------------------------------------------------------------------------------------------------------------------------------------------------------------------------------------------------------------------------------------------------------------------------------------------------------------------------------------------------------------------------------------------------------------------------------------------------------------------------------------------------------------------------------------------------------------------------------------------------------------------------------------------------------------------------------------------------------------------------------------------------------------------------------------------------------------------------------------------------------------------------------------------------------------------------------------------------------------------------------------------------------------------------------------------------------------------------------------------------------------------------------------------------------------------------------------------------------------------------------------------------------------------------------------------------------|---------------------------------------------------------------------------------------------------------------------------------------------------------------------------------------------------------------------------------------------------------------------------------------------------------------------------------------------------------------------------------------------------------------------------------------------------------------------------------------------------------------------------------------------------------------------------------------------------------------------------------------------------------------------------------------------------------------------------------------------|
| <p>Harrison, A., Montgomery, E. T., Lurie, M. and Wilkinson, D. Hartwig, K., Pashman, J., Cherlin, E., Dale, M., Callaway, M., Czaplinski, C., Wood, W. E., Hartwig, K., Pashman, J., Cherlin, E., Dale, M., Callaway, M., Czaplinski, C., Wood, W. E., Hashim, M. J., Prinsloo, A. and Mirza, D. M. Hawley, W. A., Ter Kuile, F. O., Steketee, R. S., Nahlen, B. L., Terlouw, D. J., Gimnig, J. E., Shi, Y. P., Vulule, J. M., Alaii, J. A., Heinonen, T., Mercader, M., Quianzon, J. L., Peñera-Torralba, Hemminki, E., Long, Q., Zhang, W. H., Wu, Z., Raven, J., Tao, F., Yan, H., Wang, Y., Klemetti, R., Henderson-Smart, D. J., Lumbiganon, P., Festin, M. R., Ho, J. J., Mohammad, H., Hendriks, M., Brewster, L., Wit, F., Bolarinwa, O. A., Odusola, A. O., Redekop, W., Bindraban, N., Vollaard, A., Alli, S., Adenusi, P., Henley, C., Forgwei, G., Welty, T., Golden, M., Adimora, A., Shields, R. and Muffih, P. T. Henry, J. A., Orgoi, S., Govind, S., Price, R. R., Lundeg, G. and Kehrer, B. Herbst, K., Littlejohns, P., Rawlinson, J., Collinson, M. and Wyatt, J. C. Hernández-Ávila, J. E., Palacio-Mejía, L. S., Lara-Esqueda, A., Silvestre, E., Agudelo-Botero, M., Hetzel, M. W., Iteba, N., Makemba, A., Mshana, C., Lengeler, C., Obrist, B., Schulze, A., Nathan, R., Dillip, A., Alba, S., Hill, J., Hoyt, J., van Eijk, A. M., D'Mello-Guyett, L., ter Kuile, F. O., Steketee, R., Smith, H. and</p> | <p>Barriers to implementing South Africa's Termination of Pregnancy Hospital management in the context of health sector reform: A planning model in Ethiopia Hospital management in the context of health sector reform: A planning model in Ethiopia Quality improvement tools for chronic disease care--more effective Implications of the western Kenya permethrin-treated bed net study for policy, program implementation, and future Conceptualizing and applying a minimum basic needs approach in Impact of financial and educational interventions on maternity care: Results of cluster randomized trials Optimising reproductive and child health outcomes by building evidence-based research and Cardiovascular disease prevention in rural Nigeria in the context of a community based health insurance scheme: Quality improvement Scale-up and case-finding effectiveness of an HIV partner services program in Cameroon: An Strengthening surgical services at the soum (First-referral) hospital: The WHO Emergency and Essential Evaluating computerized health information systems: Hardware, software and human ware: Assessing the process of designing and implementing electronic health records in a statewide public health Understanding and improving access to prompt and effective malaria treatment and care in rural Tanzania: The ACCESS Programme Factors Affecting the Delivery, Access, and Use of Interventions to Prevent Malaria in Pregnancy in Sub-</p> | <p>Health Policy and Planning 15(4): 424-431. International Journal of Health Planning and Management 23(3): 203-206. International Journal of Health Planning and Management 23(3): 203-206. International journal of health care quality American Journal of Tropical Medicine and Hygiene 68(4 SUPPL.): 168-173. Health Policy and Planning 15(2): 194-206. Maternal and Child Health Journal 17(2): 208-221. BMC Medical Research Methodology 7. BMC Public Health 11. Sexually Transmitted Diseases 40(12): 909-914. World Journal of Surgery 36(10): 2359-2370. Journal of Public Health Medicine 21(3): 305-310. Journal of the American Medical Informatics Association 20(2): 238-248. Malaria Journal 6. PLoS Medicine 10(7).</p> |
|-------------------------------------------------------------------------------------------------------------------------------------------------------------------------------------------------------------------------------------------------------------------------------------------------------------------------------------------------------------------------------------------------------------------------------------------------------------------------------------------------------------------------------------------------------------------------------------------------------------------------------------------------------------------------------------------------------------------------------------------------------------------------------------------------------------------------------------------------------------------------------------------------------------------------------------------------------------------------------------------------------------------------------------------------------------------------------------------------------------------------------------------------------------------------------------------------------------------------------------------------------------------------------------------------------------------------------------------------------------------------------------------------------------------------------------|--------------------------------------------------------------------------------------------------------------------------------------------------------------------------------------------------------------------------------------------------------------------------------------------------------------------------------------------------------------------------------------------------------------------------------------------------------------------------------------------------------------------------------------------------------------------------------------------------------------------------------------------------------------------------------------------------------------------------------------------------------------------------------------------------------------------------------------------------------------------------------------------------------------------------------------------------------------------------------------------------------------------------------------------------------------------------------------------------------------------------------------------------------------------------------------------------------------------------------------------------------------------------------------------------------------------------------------------------------------------------------------------------------------------------------------------------------------------------------------------------|---------------------------------------------------------------------------------------------------------------------------------------------------------------------------------------------------------------------------------------------------------------------------------------------------------------------------------------------------------------------------------------------------------------------------------------------------------------------------------------------------------------------------------------------------------------------------------------------------------------------------------------------------------------------------------------------------------------------------------------------|

|                                                                                                                                                                                                                                                                                                                                                                                                                           |                                                                                                                                                                                                                                                                                                                                                                                                                                                                                                                                                                                                                                                                                                                                                                                                                                                                                                                                                                                                                                                                                                                                                                                                                                                                                                                                                                                                                                                                                                                                                                                                                                                                                                                                                                                                                      |                                                                                                                                                                                                                                                                                                                                                                                                                                                                                                                                                                                                                                                                                                                                                                                                                                                                                     |
|---------------------------------------------------------------------------------------------------------------------------------------------------------------------------------------------------------------------------------------------------------------------------------------------------------------------------------------------------------------------------------------------------------------------------|----------------------------------------------------------------------------------------------------------------------------------------------------------------------------------------------------------------------------------------------------------------------------------------------------------------------------------------------------------------------------------------------------------------------------------------------------------------------------------------------------------------------------------------------------------------------------------------------------------------------------------------------------------------------------------------------------------------------------------------------------------------------------------------------------------------------------------------------------------------------------------------------------------------------------------------------------------------------------------------------------------------------------------------------------------------------------------------------------------------------------------------------------------------------------------------------------------------------------------------------------------------------------------------------------------------------------------------------------------------------------------------------------------------------------------------------------------------------------------------------------------------------------------------------------------------------------------------------------------------------------------------------------------------------------------------------------------------------------------------------------------------------------------------------------------------------|-------------------------------------------------------------------------------------------------------------------------------------------------------------------------------------------------------------------------------------------------------------------------------------------------------------------------------------------------------------------------------------------------------------------------------------------------------------------------------------------------------------------------------------------------------------------------------------------------------------------------------------------------------------------------------------------------------------------------------------------------------------------------------------------------------------------------------------------------------------------------------------|
| Hoehner, C. M., Ribeiro, I. C., Parra, D. C., Reis, R. S., Azevedo, M. R., Hino, A. A., Soares, J., Hoke, T., Harries, J., Crede, S., Green, M., Constant, D., Holloway, K. A., Karkee, S. B., Tamang, A., Gurung, Y. B., Kafle, Homma, A., Tanuri, A., Duarte, A. J. S., Marques, E., de Almeida, A., Hong, X. C., Xu, X. J., Chen, X., Li, Y. S., Yu, C. H., Yuan, Y., Chen, Y. Y., Li, R. D., Qiu, J., Liu, Z. C., Yi, | Physical activity interventions in Latin America: Expanding and classifying the evidence<br>2013<br>Expanding contraceptive options for PMTCT clients: A mixed methods<br>2014<br>Community intervention to promote rational treatment of acute<br>2009<br>Vaccine research, development, and innovation in Brazil: A translational<br>2013<br>Assessing the Effect of an Integrated Control Strategy for Schistosomiasis Japonica Emphasizing Bovines in a Mectizan delivery systems and cost<br>2013<br>recovery in the Central African<br>1998<br>An e-health decision support system<br>2013<br>for improving compliance of health<br>2013<br>Implementation and community involvement in DOTS strategy: A<br>2012<br>Early initiation of community-based<br>2012<br>programmes in Nepal: a historic<br>2012<br>Essential medicine policy in China:<br>2013<br>pros and cons<br>Impact of alternative<br>2012<br>reimbursement strategies in the new<br>2012<br>cooperative medical scheme on<br>Perceptions of healthcare<br>2012<br>professionals regarding the main<br>2012<br>challenges and barriers to effective<br>Using a checklist to identify barriers<br>2012<br>to compliance with evidence-based<br>guidelines for central line<br>2012<br>The impact of an immunization<br>programme administered through<br>the Growth Monitoring Programme<br>2010<br>Plus as an alternative way of<br>Free formula milk in the prevention<br>of mother-to-child transmission<br>2013<br>programme: Voices of a peri-urban<br>Using targeted vouchers and health<br>equity funds to improve access to<br>2010<br>skilled birth attendants for poor<br>Translating evidence into practice in<br>2012<br>low resource settings: Cervical<br>Improvement of coverage and<br>2005<br>utilization of EmOC services in | American Journal of Preventive Medicine<br>44(3): e31-e40.<br>Reproductive Health<br>11(1).<br>Tropical Medicine and International Health<br>Vaccine 31(SUPPL2): B54-B60.<br>PLoS Neglected Tropical Diseases 7(3).<br>Annals of Tropical Medicine and Parasitology<br>Applied Clinical Informatics 4(1): 25-36.<br>International Journal of Tuberculosis and Lung<br>Journal of Nepal Health Research Council 10(21):<br>Journal of medical economics 16(2): 289-<br>BMC Health Services Research 12(1).<br>BMC Infectious Diseases 12.<br>International Journal of Infectious Diseases 16(7): e551-e557.<br>Transactions of the Royal Society of Tropical Medicine and Hygiene 104(9): 577-582.<br>Health Policy and Planning 28(7): 761-768.<br>BMC Pregnancy and Childbirth 10.<br>Asian Pacific Journal of Cancer Prevention 13(8):<br>International Journal of Gynecology and |
| Hopkins, A. D.<br>Horner, V., Rautenbach, P., Mbananga, N., Mashamba, T. and Hou, W. L., Song, F. J., Zhang, N. X., Dong, X. X., Cao, S. Y., Yin, X. Houston, R., Acharya, B., Poudel, D., Pradhan, S., Singh, S.,                                                                                                                                                                                                        |                                                                                                                                                                                                                                                                                                                                                                                                                                                                                                                                                                                                                                                                                                                                                                                                                                                                                                                                                                                                                                                                                                                                                                                                                                                                                                                                                                                                                                                                                                                                                                                                                                                                                                                                                                                                                      |                                                                                                                                                                                                                                                                                                                                                                                                                                                                                                                                                                                                                                                                                                                                                                                                                                                                                     |
| Hu, S.                                                                                                                                                                                                                                                                                                                                                                                                                    |                                                                                                                                                                                                                                                                                                                                                                                                                                                                                                                                                                                                                                                                                                                                                                                                                                                                                                                                                                                                                                                                                                                                                                                                                                                                                                                                                                                                                                                                                                                                                                                                                                                                                                                                                                                                                      |                                                                                                                                                                                                                                                                                                                                                                                                                                                                                                                                                                                                                                                                                                                                                                                                                                                                                     |
| Huang, K., Tao, F., Bogg, L. and Tang, S.                                                                                                                                                                                                                                                                                                                                                                                 |                                                                                                                                                                                                                                                                                                                                                                                                                                                                                                                                                                                                                                                                                                                                                                                                                                                                                                                                                                                                                                                                                                                                                                                                                                                                                                                                                                                                                                                                                                                                                                                                                                                                                                                                                                                                                      |                                                                                                                                                                                                                                                                                                                                                                                                                                                                                                                                                                                                                                                                                                                                                                                                                                                                                     |
| Ider, B. E., Adams, J., Morton, A., Whitby, M. and Clements, A.<br>Ider, B. E., Adams, J., Morton, A., Whitby, M., Muugolog, T., Lundeg, G. and Clements, A.                                                                                                                                                                                                                                                              |                                                                                                                                                                                                                                                                                                                                                                                                                                                                                                                                                                                                                                                                                                                                                                                                                                                                                                                                                                                                                                                                                                                                                                                                                                                                                                                                                                                                                                                                                                                                                                                                                                                                                                                                                                                                                      |                                                                                                                                                                                                                                                                                                                                                                                                                                                                                                                                                                                                                                                                                                                                                                                                                                                                                     |
| Igarashi, K., Sasaki, S., Fujino, Y., Tanabe, N., Muleya, C. M., Tambatamba, B. and Suzuki, H.<br>Ijumba, P., Doherty, T., Jackson, D., Tomlinson, M., Sanders, D. and Persson, L. A.                                                                                                                                                                                                                                     |                                                                                                                                                                                                                                                                                                                                                                                                                                                                                                                                                                                                                                                                                                                                                                                                                                                                                                                                                                                                                                                                                                                                                                                                                                                                                                                                                                                                                                                                                                                                                                                                                                                                                                                                                                                                                      |                                                                                                                                                                                                                                                                                                                                                                                                                                                                                                                                                                                                                                                                                                                                                                                                                                                                                     |
| Ir, P., Horemans, D., Souk, N. and Van Damme, W.<br>Isaac, R., Finkel, M., Olver, I., Annie, I. K., Prashanth, H. R., Islam, M. T., Hossain, M. M., Islam, M. A. and Haque, Y. A.                                                                                                                                                                                                                                         |                                                                                                                                                                                                                                                                                                                                                                                                                                                                                                                                                                                                                                                                                                                                                                                                                                                                                                                                                                                                                                                                                                                                                                                                                                                                                                                                                                                                                                                                                                                                                                                                                                                                                                                                                                                                                      |                                                                                                                                                                                                                                                                                                                                                                                                                                                                                                                                                                                                                                                                                                                                                                                                                                                                                     |

|                                                                                                                                                                                                                                                                    |      |                                                                                                                                                                                                                                            |                                                                                             |
|--------------------------------------------------------------------------------------------------------------------------------------------------------------------------------------------------------------------------------------------------------------------|------|--------------------------------------------------------------------------------------------------------------------------------------------------------------------------------------------------------------------------------------------|---------------------------------------------------------------------------------------------|
| Ith, P., Dawson, A., Homer, C. S. E. and Klinken Whelan, A.                                                                                                                                                                                                        | 2013 | Practices of skilled birth attendants during labour, birth and the                                                                                                                                                                         | Midwifery 29(4): 300-307.                                                                   |
| Iyengar, K., Jain, M., Thomas, S., Dashora, K., Liu, W., Saini, P., Dattatreya, R., Parker, I. and Janusz, C. B., Jauregui, B., Sinha, A., Clark, A. D., Bolaños, B. M., Resch, S., Toscano, C. and Jayatissa, R., Bekele, A., Kethiswaran, A. and De Silva, A. H. | 2014 | Adherence to evidence based care practices for childbirth before and after a quality improvement                                                                                                                                           | BMC Pregnancy and Childbirth 14(1).                                                         |
| Jenkins, A. L., Tavengwa, N. V., Chasekwa, B., Chatora, K., Taruberekera, N., Mushayi, W., Madzima, R. C. and Mbuya, M. N.                                                                                                                                         | 2012 | Performing Country-led Economic Evaluations to Inform Immunization Policy: ProVac Experiences in Latin America                                                                                                                             | Value in Health Regional Issues 1(2): 248-253.                                              |
| Jennings, L., Yebadokpo, A. S., Affo, J. and Agbogbe, M.                                                                                                                                                                                                           | 2012 | Community-based management of severe and moderate acute malnutrition during emergencies in                                                                                                                                                 | Food and Nutrition Bulletin 33(4): 251-260.                                                 |
| Jeppsson, A., Östergren, P. O. and Hagström, B.                                                                                                                                                                                                                    | 2012 | Addressing social barriers and closing the gender knowledge gap: Exposure to road shows is associated with more knowledge and more Antenatal counseling in maternal and newborn care: Use of job aids to improve health worker performance | Maternal and Child Nutrition 8(4): 459-470.                                                 |
| Johnson, A., Goss, A., Beckerman, J. and Castro, A.                                                                                                                                                                                                                | 2010 | Restructuring a ministry of health - An issue of structure and process: A Hidden costs: The direct and indirect impact of user fees on                                                                                                     | BMC Pregnancy and Childbirth 10.                                                            |
| Jones, C. O. H., Wasunna, B., Sudoi, R., Githinji, S., Snow, R. W. and Zurovac, D.                                                                                                                                                                                 | 2003 | Even if you know everything you can forget: Health worker perceptions of mobile phone text-messaging to                                                                                                                                    | Health Policy and Planning 18(1): 68-73.                                                    |
| Juntasopeepun, P., Davidson, P. M. and Srisomboon, J.                                                                                                                                                                                                              | 2012 | Issues and challenges in implementing cervical cancer                                                                                                                                                                                      | Social Science and Medicine 75(10): 1786-                                                   |
| Jurawan, K., Dindial, D., Hosein, S., King, D., Sahadeo, A. and Kalibala, S., Tun, W., Cherutich, P., Nganga, A., Oweya, E. and                                                                                                                                    | 2012 | An evaluation of intervention strategies for HIV/AIDS in Trinidad                                                                                                                                                                          | PLoS ONE 7(6).                                                                              |
| Kalita, A. and Mondal, S.                                                                                                                                                                                                                                          | 2009 | Factors associated with acceptability of HIV self-testing                                                                                                                                                                                  | Collegian 19(1): 45-50.                                                                     |
| Kamadjeu, R. M., Tapang, E. M. and Moluh, R. N.                                                                                                                                                                                                                    | 2014 | Role of innovative institutional structures in integrated governance: A case study of integrating health                                                                                                                                   | International Journal of Adolescent Medicine and AIDS and Behavior 18(SUPPL. 4): S405-S414. |
| Kamineni, V. V., Wilson, N., Das, A., Satyanarayana, S., Chadha, S., Kanitvittaya, S., Suksai, U., Suksripanich, O. and Pobkeeree,                                                                                                                                 | 2012 | Designing and implementing an electronic health record system in primary care practice in sub-Saharan                                                                                                                                      | Journal of Health, Organisation and Management 26(6): 758-                                  |
| Kasonde, J. M. and Campbell, S.                                                                                                                                                                                                                                    | 2005 | Addressing poverty through disease control programmes: Examples from                                                                                                                                                                       | Informatics in Primary Care 13(3): 179-186.                                                 |
| Kassean, H. K. and Jagoo, Z. B.                                                                                                                                                                                                                                    | 2012 | Laboratory quality improvement in Thailand's northernmost provinces                                                                                                                                                                        | International Journal for Equity in Health 11(1).                                           |
|                                                                                                                                                                                                                                                                    | 2010 | Creating a Knowledge Translation Platform: nine lessons from the                                                                                                                                                                           | International Journal of Health Care Quality Health Research Policy and Systems 10.         |
|                                                                                                                                                                                                                                                                    | 2012 | Managing change in the nursing handover from traditional to                                                                                                                                                                                | BMC Nursing 4.                                                                              |



- Kaufman, J., Liu, Y. and Fang, J. 2012 Improving reproductive health in rural China through participatory  
Kaur, P., Rao, S. R., 2012 High prevalence of tobacco use,  
Radhakrishnan, E., 2011 alcohol use and overweight in a  
Kawonga, M., Blaauw, D. and 2012 Aligning vertical interventions to  
Fonn, S. 2012 health systems: A case study of the  
Food-based dietary guidelines and  
Keller, I. and Lang, T. 2008 implementation: Lessons from four  
Kevany, S., Khumalo-Sakutukwa, 2008 Health diplomacy the adaptation of  
G., Murima, O., Chingono, A., global health interventions to local  
Modiba, P., Gray, G., Van needs in sub-Saharan Africa and  
Rooyen, H., Mrumbi, K., Thailand: Evaluating findings from  
Mbwambo, J., Kawichai, S., 2012 Project Accept (HPTN 043)  
Khanal, S., Sharma, J., Vijay Community health workers can  
Singh, G. C., Dawson, P., 2011 identify and manage possible  
Khatib, R. A., Skarbinski, J., Njau, Routine delivery of artemisinin-  
J. D., Goodman, C. A., Elling, B. based combination treatment at  
F., Kahigwa, E., Roberts, J. M., fixed health facilities reduces  
MacArthur, J. R., Gutman, J. R., malaria prevalence in Tanzania: An  
Kabanywany, A. M., Smith, E. E., 2012 observational study  
Somi, M. F., Lyimo, T., Mwita, A., Comprehensive care and HIV  
Kim, J. C., Askew, I., Muvhango, 2009 prophylaxis after sexual assault in  
L., Dwane, N., Abramsky, T., Jan, Influencing women's actions on  
Kim, Y. M., Ati, A., Kols, A., 2012 cervical cancer screening and  
Lambe, F. M., Soetikno, D., Meaningful involvement of people  
living with HIV/AIDS in Uganda  
Kim, Y. M., Kalibala, S., Neema, 2012 through linkages between network  
S., Lukwago, J. and Weiss, D. C. Application of eco-friendly tools and  
Kittayapong, P., Thongyuan, S., eco-biosocial strategies to control  
Olanratmanee, P., 2013 dengue vectors in urban and peri-  
Aumchareoun, W., Koyadun, S., Development and implementation  
Knowlton, K., Kulkarni, S. P., of South Asia's first heat-health  
Azhar, G. S., Mavalankar, D., action plan in Ahmedabad (Gujarat,  
Jaiswal, A., Connolly, M., Nori- India)  
Sarma, A., Rajiva, A., Dutta, P., 2014 Impact of measles eradication  
Koehlmoos, T. P., Uddin, J. and activities on routine immunization  
Sarma, H. 2011 Malaria control in complex  
emergencies: The example of East  
Kolaczinski, J. and Webster, J. 2003 Effect of audit and feedback on the  
Kongnyuy, E. J., Leigh, B. and van availability, utilisation and quality  
den Broek, N. 2008 Using criteria-based audit to  
improve the management of  
Kongnyuy, E. J., Mlava, G. and 2009 postpartum haemorrhage in  
van den Broek, N. Global Public Health 7(8):  
856-868.  
Journal of Postgraduate  
Medicine 57(1): 9-15.  
Health Research Policy  
and Systems 10.  
Public Health Nutrition  
11(8): 867-874.  
BMC Public Health 12(1).  
Journal of Health,  
Population and Nutrition  
Malaria Journal 11.  
BMJ (Clinical research ed.)  
338.  
Asian Pacific Journal of  
Cancer Prevention 13(6):  
Psychology, Health and  
Medicine 17(2): 213-222.  
Pathogens and Global  
Health 106(8): 446-454.  
International Journal of  
Environmental Research  
and Public Health 11(4):  
3473-3492.  
Journal of Infectious  
Diseases 204(SUPPL. 1):  
Tropical Medicine and  
International Health 8(1):  
Women and Birth 21(4):  
149-155.  
Maternal and Child Health  
Journal 13(6): 873-878.

|                                                                                                                                                                                                                                                                                                                                                                                                                                                                                                                                                                                                                                                                 |                                                                      |                                                                                                                                                                                                                                                                                                                                                                                                                                                                                                                                                                                                                                                                                                                                                                                                                                                                                                                                                                                                                                                                                                                                                                                                                                                                                                                                                                                                                                                                                                                        |                                                                                                                                                                                                                                                                                                                                                                                                                                                                                                                                                                                                                                                                                                                                                                                                                                 |
|-----------------------------------------------------------------------------------------------------------------------------------------------------------------------------------------------------------------------------------------------------------------------------------------------------------------------------------------------------------------------------------------------------------------------------------------------------------------------------------------------------------------------------------------------------------------------------------------------------------------------------------------------------------------|----------------------------------------------------------------------|------------------------------------------------------------------------------------------------------------------------------------------------------------------------------------------------------------------------------------------------------------------------------------------------------------------------------------------------------------------------------------------------------------------------------------------------------------------------------------------------------------------------------------------------------------------------------------------------------------------------------------------------------------------------------------------------------------------------------------------------------------------------------------------------------------------------------------------------------------------------------------------------------------------------------------------------------------------------------------------------------------------------------------------------------------------------------------------------------------------------------------------------------------------------------------------------------------------------------------------------------------------------------------------------------------------------------------------------------------------------------------------------------------------------------------------------------------------------------------------------------------------------|---------------------------------------------------------------------------------------------------------------------------------------------------------------------------------------------------------------------------------------------------------------------------------------------------------------------------------------------------------------------------------------------------------------------------------------------------------------------------------------------------------------------------------------------------------------------------------------------------------------------------------------------------------------------------------------------------------------------------------------------------------------------------------------------------------------------------------|
| Kozhimannil, K. B., Valera, M. R., Adams, A. S. and Ross-Degnan, D. Krishnan, A., Ekowati, R., Baridalyne, N., Kusumawardani, Krishnan, N., Ananthkrishnan, R., Augustine, S., Vijayalakshmi, N. K., Gopi, P. G., Kumaraswami, Krishnan, S., Subbiah, K., Khanum, S., Chandra, P. S. and Padian, N. S. Krueger, K., Akol, A., Wamala, P. and Brunie, A. Kuchenbecker, R. and Polanczyk, C. A.                                                                                                                                                                                                                                                                   | 2009<br>2011<br>2009<br>2012<br>2011<br>2012                         | The population-level impacts of a national health insurance program and franchise midwife clinics on Evaluation of community-based interventions for non-Impact of advocacy on the tuberculosis management practices of private practitioners in Chennai An Intergenerational Women's Empowerment Intervention to Mitigate Domestic Violence: Results Scaling up community provision of injectables through the public Institutionalizing Health Technology Assessment in Brazil: Challenges Advancing the application of systems thinking in health: Realist evaluation of the Leadership Early assessment of the implementation of a national programme for the prevention of mother-to-child transmission of HIV Reproductive health services for populations at high risk of HIV: Additional cash incentive within a conditional cash transfer scheme: a 'controlled before and during' The FIGO Save the Mothers Initiative: The Uganda-Canada Morbidity and mortality due to malaria in Est Mono district, Togo, Scaling up zinc treatment of childhood diarrhoea in Bangladesh: Opt-out HIV testing during antenatal care: Experiences of pregnant women in rural Uganda Evaluation of a Well-Established Task-Shifting Initiative: The Lay Counselor Cadre in Botswana The Peru cervical cancer prevention study (PERCAPS) : Community-based participatory research in Manchay, Development and implementation of a nutrition intervention Implementation in Indonesia of the WHO Pocket Book of Hospital Care | Health Policy 92(1): 55-64.<br>Health Promotion International 26(3): 276-International Journal of Tuberculosis and Lung Disease 13(1): 112-118.<br>Violence Against Women 18(3): 346-370.<br>Studies in Family Planning 42(2): 117-124.<br>Value in Health Regional Issues 1(2): 257-261.<br>Health Research Policy and Systems 12(1).<br>Tropical Medicine and International Health 14(3): 288-293.<br>BMC Health Services Research 10.<br>Indian journal of public health 55(2): 115-120.<br>International Journal of Gynecology and Malaria Journal 11.<br>Health Policy and Planning 27(2): 102-114.<br>Health Policy and Planning 27(1): 69-75.<br>PLoS ONE 8(4).<br>International Journal of Gynecological Cancer 23(1): 141-147.<br>Health Promotion International 27(4): 453-Paediatrics and International Child Health |
| Kwamie, A., Dijk, H. V. and Agyepong, I. A.                                                                                                                                                                                                                                                                                                                                                                                                                                                                                                                                                                                                                     | 2014                                                                 | Early assessment of the implementation of a national programme for the prevention of mother-to-child transmission of HIV                                                                                                                                                                                                                                                                                                                                                                                                                                                                                                                                                                                                                                                                                                                                                                                                                                                                                                                                                                                                                                                                                                                                                                                                                                                                                                                                                                                               | Health Research Policy and Systems 12(1).                                                                                                                                                                                                                                                                                                                                                                                                                                                                                                                                                                                                                                                                                                                                                                                       |
| Labhardt, N. D., Manga, E., Ndam, M., Balo, J. R., Bischoff, A. and Stoll, B. Lafort, Y., Geelhoed, D., Cumba, L., Lzaro, C. D. D. M., Delva, W.,                                                                                                                                                                                                                                                                                                                                                                                                                                                                                                               | 2009<br>2010                                                         | mother-to-child transmission of HIV Reproductive health services for populations at high risk of HIV: Additional cash incentive within a conditional cash transfer scheme: a 'controlled before and during'                                                                                                                                                                                                                                                                                                                                                                                                                                                                                                                                                                                                                                                                                                                                                                                                                                                                                                                                                                                                                                                                                                                                                                                                                                                                                                            | Tropical Medicine and International Health 14(3): 288-293.<br>BMC Health Services Research 10.                                                                                                                                                                                                                                                                                                                                                                                                                                                                                                                                                                                                                                                                                                                                  |
| Lahariya, C., Mishra, A., Nandan, D., Gautam, P. and Gupta, S. Lalonde, A. B., Okong, P., Mugasa, A. and Perron, L. Landoh, E. D., Tchamdja, P., Saka, B., Tint, K. S., Gitta, S. N., Larson, C. P., Koehlmoos, T. P. and Sack, D. A. Larsson, E. C., Thorson, A., Pariyo, G., Conrad, P., Arinaitwe, M., Kemigisa, M., Eriksen, J., Ledikwe, J. H., Kejelepula, M., Maupo, K., Sebetso, S., Thekiso, M., Smith, M., Mbayi, B., Levinson, K. L., Abuelo, C., Chyung, E., Salmeron, J., Belinson, S. E., Sologuren, C. V., Lhussier, M., Bangash, S., Dykes, F., Zaman, M. and Lowe, N. M. Li, M. Y., Puspita, R., Duke, T., Agung, F. H., Hegar, B., Pritasari, | 2011<br>2003<br>2012<br>2012<br>2012<br>2013<br>2013<br>2012<br>2014 | 'controlled before and during' The FIGO Save the Mothers Initiative: The Uganda-Canada Morbidity and mortality due to malaria in Est Mono district, Togo, Scaling up zinc treatment of childhood diarrhoea in Bangladesh: Opt-out HIV testing during antenatal care: Experiences of pregnant women in rural Uganda Evaluation of a Well-Established Task-Shifting Initiative: The Lay Counselor Cadre in Botswana The Peru cervical cancer prevention study (PERCAPS) : Community-based participatory research in Manchay, Development and implementation of a nutrition intervention Implementation in Indonesia of the WHO Pocket Book of Hospital Care                                                                                                                                                                                                                                                                                                                                                                                                                                                                                                                                                                                                                                                                                                                                                                                                                                                              | Indian journal of public health 55(2): 115-120.<br>International Journal of Gynecology and Malaria Journal 11.<br>Health Policy and Planning 27(2): 102-114.<br>Health Policy and Planning 27(1): 69-75.<br>PLoS ONE 8(4).<br>International Journal of Gynecological Cancer 23(1): 141-147.<br>Health Promotion International 27(4): 453-Paediatrics and International Child Health                                                                                                                                                                                                                                                                                                                                                                                                                                             |

Liao, S., Weeks, M. R., Wang, Y., Li, F., Jiang, J., Li, J., Zeng, X., He, B. and Dunn, J. 2011 Female condom use in the rural sex industry in China: Analysis of users and non-users at post-intervention

Lim, S. S., Dandona, L., Hoisington, J. A., James, S. L., Hogan, M. C. and Gakidou, E. 2010 India's Janani Suraksha Yojana, a conditional cash transfer programme to increase births in Promoting community knowledge

Lim, S., Yasuoka, J., Poudel, K. C., Ly, P., Nguon, C. and Jimba, M. 2012 and action for malaria control in Why has the universal coverage

Limwattananon, S., Tangcharoensathien, V., Little, A., Medhanyie, A., Yebyo, H., Spigt, M., Dinant, G. J. and Littrell, M., Moukam, L. V., Libite, R., Youmba, J. C. and Liu, X., Tang, S., Yu, B., Phuong, N. K., Yan, F., Thien, D. D. and Liu, Y., Yuan, Z., Liu, Y., Jayasinghe, U. W. and Harris, M. F. 2012 scheme in Thailand achieved a pro-Meeting community health worker needs for maternal health care

Loechl, C. U., Menon, P., Arimond, M., Ruel, M. T., Pelto, G., Habicht, J. P. and Michaud, L. 2009 Narrowing the treatment gap with equitable access: Mid-term Can rural health insurance improve equity in health care utilization? a

Loharikar, A., Russo, E., Sheth, A., Menon, M., Kudzala, A., Tauzie, B., Masuku, H. D., Ayers, T., Loomer, P. M., Masalu, J. R., Mumghamba, E. and Perry, D. A. 2013 Changing community health service delivery in economically less-developed rural areas in China: Using programme theory to assess the feasibility of delivering micronutrient Sprinkles through a

Lu, C., Chin, B., Lewandowski, J. L., Basinga, P., Hirschhorn, L. R., Luck, M., Jarju, E., Diane Nell, M. and George, M. O. 2012 Long-term impact of integration of household water treatment and hygiene promotion with antenatal New curriculum in dentistry for Tanzania: Competency-based Towards universal health coverage: An evaluation of Rwanda Mutuelles

Lukwago, L., Nanyunja, M., Ndayimirije, N., Wamala, J., Malimbo, M., Mbabazi, W., Gasasira, A., Nabukenya, I. N., Luquero, F. J., Grout, L., Ciglenecki, I., Sakoba, K., Traore, B., Heile, M., Dialo, A. A., Itama, Luyirika, E., Towle, M. S., Achan, J., Muhangi, J., Senyimba, C., Lv, B. Y., Xiang, Y. X., Zhao, R., Feng, Z. C., Liang, S. Y. and Wang, Y. M. 2012 Mobilizing demand for contraception in Rural Gambia The implementation of Integrated Disease Surveillance and Response in Uganda: A review of progress and challenges between 2001 and 2007

Ma, Y., Zhang, F., Li, H., Wu, H., Zhang, J., Ding, Y., Zhao, D., Fang, H., Zhou, S., Liu, Z., Zhang, L., 2012 First Outbreak Response Using an Oral Cholera Vaccine in Africa: Vaccine Coverage, Acceptability and Scaling Up Paediatric HIV Care with an Integrated, Family-Centred Impact evaluation of HIV/AIDS education in rural Henan province of China

Monitoring HIV drug resistance using early warning indicators in China: Results from a pilot survey

AIDS Care - Psychological and Socio-Medical Aspects of AIDS/HIV 23(SUPPL. 1): The Lancet 375(9730): 2009-2023. BMC Research Notes 5. BMC Public Health 12(SUPPL. 1). PLoS one 8(10). Health Policy and Planning 28(7): 705-716. International Journal for Equity in Health 11(1). BMJ Open 4(2). Maternal and Child Nutrition 5(1): 33-48. American Journal of Tropical Medicine and Hygiene 88(2): 267-274. Journal of Public Health Policy 33(SUPPL.1): S92- PLoS ONE 7(6). Studies in Family Planning 31(4): 325-335. Health Policy and Planning 28(1): 30-40. PLoS Neglected Tropical Diseases 7(10). PLoS ONE 8(8). Journal of Huazhong University of Science and Technology - Medical Clinical Infectious Diseases 54(SUPPL. 4): S300-S302.

- Machira, G., Kariuki, H. and Martindale, L.  
 Maclel, R. H., Fontenelle, M. F., Gonçalves, R. C., Lopes, T. A., Magoma, M., Requejo, J., Campbell, O., Cousens, S., Merialdi, M. and Filippi, V.  
 Mahfouz, M. S., Gaffar, A. M. and Bani, I. A.  
 Mainthia, R., Reppart, L., Reppart, J., Pearce, E. C., Cohen, Makanjuola, V., Doku, V., Jenkins, R. and Gureje, O.  
 Makaula, P., Bloch, P., Banda, H. T., Mbera, G. B., Mangani, C., De Sousa, A., Nkhono, E., Jemu, S. Mallik, S., Mandal, P. K., Chatterjee, C., Ghosh, P., Manna, Maluka, S., Kamuzora, P., Ndawi, B. and Hurtig, A. K.  
 Manabe, T., Thuy, P. T. P., Kudo, K., Van, V. T. T., Takasaki, J., Tuan, N. D., Co, D. X., Minh, D. H., Mandala, J., Torpey, K., Kasonde, P., Kabaso, M., Dirks, R., Suzuki, Maokola, W., Willey, B. A., Shirima, K., Chemba, M., Armstrong Schellenberg, J. R. M., Marnani, A. B., Teymourzadeh, E., Bahadori, M., Ravangard, R. and Pour, J. S.  
 Marraccini, T., Meltzer, S., Bourne, L. and Elizabeth Draper, Masalu, J. R., Aboud, M., Moshi, M. J., Mugusi, F., Kamuhabwa, A., Mgimwa, N., Freeman, P., Masanja, I. M., Lutambi, A. M. and Khatib, R. A.  
 Masanja, I. M., Selemani, M., Amuri, B., Kajungu, D., Khatib, R., Kachur, S. P. and Skarbinski, J.
- Impact of an educational pain management programme on nurses' Ports of Mucuripe and Pecém, Ceará, Brazil: Restructuring process  
 The effectiveness of birth plans in increasing use of skilled care at delivery and postnatal care in rural lodized salt consumption in Sudan: Present status and future directions  
 A model for improving the health and quality of life of single mothers  
 Monitoring and evaluation of the activities of trainees in the 'training Primary health care in rural Malawi - A qualitative assessment exploring the relevance of the community- Assessing cold chain status in a metro city of India: An intervention Involving decision-makers in the research process: Challenges of implementing the accountability for Impact of education and network for avian influenza H5N1 in human: Knowledge, clinical practice, and Prevention of mother-to-child transmission of HIV in Zambia: Enhancing the routine health information system in rural southern Tanzania: Successes, Challenges of a large health insurance organization in Iran: A qualitative study  
 A qualitative evaluation of exposure to and perceptions of the An institutional research agenda: Focusing university expertise in Tanzania on national health  
 Do health workers' preferences influence their practices? Assessment of providers' attitude and personal use of new treatment  
 Increased use of malaria rapid diagnostic tests improves targeting of anti-malarial treatment in rural
- International Journal of Palliative Nursing 19(7): Work 41(SUPPL.1): 3130-3135.  
 Tropical Medicine and International Health 18(4): 435-443.  
 Journal of Health, Population and Nutrition African journal of reproductive health  
 Mental Health in Family Medicine 9(1): 25-32.  
 BMC Health Services Research 12(1).  
 African Health Sciences 11(1): 128-133.  
 Global Public Health 9(7): 760-772.  
 PLoS ONE 7(1).  
 BMC Public Health, 9(1), 1.  
 Tropical Medicine and International Health 16(6): 721-730.  
 International Journal of Collaborative Research on Internal Medicine and Childhood Obesity 8(4): 369-377.  
 Journal of Public Health Policy 33(SUPPL.1): S186-S201.  
 BMC Public Health 12(1).  
 Malaria Journal 11.

- Massa, K., Magnussen, P., Sheshe, A., Ntakumulenga, R., Ndawi, B. and Olsen, A. 2009 The effect of the community-directed treatment approach versus the school-based treatment approach on the prevalence and integration of insecticide-treated net distribution into routine care and treatment in Haiti: An Operational research and HIV policy and guidelines: Lessons from a study of patients lost to follow-up from a public antiretroviral treatment Intermittent preventive treatment of malaria in pregnancy: a community-based delivery system Intermittent preventive treatment of malaria in pregnancy: A new delivery system and its effect on Lesotho's Minimum PMTCT Package: Lessons learned for combating vertical HIV transmission using co-Cryptococcal meningitis management in Tanzania with strict schedule of serial lumbar punctures The role of health extension workers in improving utilization of maternal health services in rural areas in A Review of Parenting Programs in Developing Countries: Opportunities and Challenges for Problems of cost recovery implementation in district health Helping rural women in Pakistan to prevent postpartum hemorrhage: A Problems and perspectives of managing onchocerciasis control Research-policy partnerships - experiences of the Mental Health Perceived improvement in integrated management of childhood illness implementation Analyzing the influence of institutions on health policy development in Uganda: A case
- Transactions of the Royal Society of Tropical Medicine and Hygiene 103(1): 31-37. Tropical Medicine and International Health International Journal of Medical Informatics 81(4): 244-256. Journal of Public Health Policy 33(4): 462-477. International Journal of Infectious Diseases 12(1): 22-29. Bulletin of the World Health Organization 86(2): 93-100. Journal of the International AIDS Society 15(2). Journal of Acquired Immune Deficiency Syndromes 66(2): e31- BMC Health Services Research 12(1). Clinical Child and Family Psychology Review 15(2): 163-175. Health Policy and Planning 17(3): 304-313. BMC Pregnancy and Childbirth 12. Annals of Tropical Medicine and Parasitology Health Research Policy and Systems 10. Journal of Health Communication 17(SUPPL. 1): 118-127. African Health Sciences 11(4): 578-586.
- Mathanga, D. P., Luman, E. T., Campbell, C. H., Silwimba, C. and Matheson, A. I., Baseman, J. G., Wagner, S. H., O'Malley, G. E., Puttkammer, N. H., Emmanuel, Mben, J. M., Kouanfack, C., Essomba, C. N., Mbougua, J. B. T., Kenfack, A., Tonfack, C. A. D., Laborde-Balen, G., Bourgeois, A., 2009
- Mbonye, A. K., Bygbjerg, I. and Magnussen, P. 2008
- Mbonye, A. K., Bygbjerg, I. C. and Magnussen, P. 2008
- McDougal, L., Moteetee, M. M., Mohai, F., Mphale, M., Mahanty, B., Motaung, B., Ankrah, V., Meda, J., Kalluvya, S., Downs, J. A., Chofle, A. A., Seni, J., Kidenya, B., Fitzgerald, D. W. and Peck, R. Medhanyie, A., Spigt, M., Kifle, Y., Schaay, N., Sanders, D., Blanco, R., Geertjan, D. and 2012
- Mejia, A., Calam, R. and Sanders, M. R. 2012
- Meuwissen, L. E. 2002
- Mir, A. M., Wajid, A. and Gull, S. 2012
- Miri, E. S. 1998
- Mirzoev, T. N., Omar, M. A., Green, A. T., Bird, P. K., Lund, C., Mitchell, M., Getchell, M., Nkaka, M., Msellemu, D., Van Esch, J. and Hedt-Gauthier, B. 2012
- Moat, K. A. and Abelson, J. 2012

|                                                                                                                                                           |              |                                                                                                                                                                           |                                                                                                       |
|-----------------------------------------------------------------------------------------------------------------------------------------------------------|--------------|---------------------------------------------------------------------------------------------------------------------------------------------------------------------------|-------------------------------------------------------------------------------------------------------|
| Mohan, P., Kishore, B., Singh, S., Bahl, R., Puri, A. and Kumar, R. Mohanan, M., Bauhoff, S., La Forgia, G., Babiarz, K. S., Singh, K. and Miller, G.     | 2011<br>2014 | Assessment of implementation of integrated management of neonatal Effect of Chiranjeevi Yojana on institutional deliveries and neonatal and maternal outcomes in Gujarat, | Journal of Health, Population and Nutrition Bulletin of the World Health Organization 92(3): 187-194. |
| Morrison, J., Tamang, S., Mesko, N., Osrin, D., Shrestha, B., Manandhar, M., Manandhar, D., Mosler, H. J., Kraemer, S. M. and Johnston, R. B.             | 2005         | Women's health groups to improve perinatal care in rural Nepal                                                                                                            | BMC Pregnancy and Childbirth 5.                                                                       |
| Mubyazi, G. M., Bloch, P., Byskov, J., Magnussen, P., Bygbjerg, I. C. and Hansen, K. S.                                                                   | 2013         | Achieving long-term use of solar water disinfection in Zimbabwe                                                                                                           | Public Health 127(1): 92-98.                                                                          |
|                                                                                                                                                           | 2012         | Supply-related drivers of staff motivation for providing intermittent preventive treatment                                                                                | Malaria Journal 11.                                                                                   |
| Mugisa, M. and Muzoora, A.                                                                                                                                | 2012         | Behavioral change communication strategy vital in malaria prevention interventions in rural communities:                                                                  | The Pan African medical journal 13 Suppl 1: 2.                                                        |
| Mukherjee, A. S., Aanestad, M. and Sahay, S.                                                                                                              | 2012         | Judicious design of electronic health records: Case from public health                                                                                                    | Health Policy and Technology 1(1): 22-27.                                                             |
| Mumtaz, Z.                                                                                                                                                | 2012         | Gender and social geography: Impact on Lady Health Workers                                                                                                                | BMC Health Services Research 12(1).                                                                   |
| Mumtaz, Z., O'Brien, B., Bhatti, A. and Jhangri, G. S.                                                                                                    | 2012         | Are community midwives addressing the inequities in access to skilled birth attendance in                                                                                 | BMC health services research 12: 326.                                                                 |
| Murukutla, N., Turk, T., Prasad, C. V. S., Saradhi, R., Kaur, J., Gupta, S., Mullin, S., Ram, F., Musoke, D., Karani, G., Ssempebwa, J. C. and Musoke, M. | 2012         | Results of a national mass media campaign in India to warn against the dangers of smokeless tobacco                                                                       | Tobacco Control 21(1): 12-17.                                                                         |
| Mutale, W., Stringer, J., Chintu, N., Chilengi, R., Mwanamwenge, M. T., Kasese, N., Balabanova, D.,                                                       | 2013         | Integrated approach to malaria prevention at household level in                                                                                                           | Malaria Journal 12(1).                                                                                |
| Myer, L., Zulliger, R., Black, S., Pienaar, D. and Bekker, L. G.                                                                                          | 2012         | Application of balanced scorecard in the evaluation of a complex health system intervention: 12 months                                                                    | PLoS ONE 9(4).                                                                                        |
| Nahar, T., Azad, K., Aumon, B. H., Younes, L., Shaha, S., Kuddus, A., Prost, A., Houweling, T. A. J.,                                                     | 2012         | Pilot programme for the rapid initiation of antiretroviral therapy in pregnancy in Cape Town, South                                                                       | AIDS Care - Psychological and Socio-Medical Aspects of AIDS/HIV 24(8): 986-                           |
| Nair, Y. and Campbell, C.                                                                                                                                 | 2008         | Scaling up community mobilisation through women's groups for maternal and neonatal health:                                                                                | BMC Pregnancy and Childbirth 12.                                                                      |
| Ndhlovu, C. E., Nathoo, K., Borok, M., Chidzonga, M., Aagaard, E. M., Connors, S. C.,                                                                     | 2014         | Building partnerships to support community-led HIV/AIDS                                                                                                                   | African Journal of AIDS Research 7(1): 45-53.                                                         |
| Ndira, S. R., Rosenberger, K. D. and Wetter, T.                                                                                                           | 2008         | Innovations to enhance the quality of health professions education at the University of Zimbabwe College                                                                  | Academic Medicine 89(8 SUPPL.): S88-S92.                                                              |
|                                                                                                                                                           | 2008         | Assessment of data quality of and staff satisfaction with an electronic health record system in a developing                                                              | Methods of Information in Medicine 47(6): 489-498.                                                    |

|                                                                                                                                                                                                                                                                                                   |                                                                                                                                                                                                                                                                                          |                                                                                                                                                                                                                                                                                                                                                                                                                                       |                                      |
|---------------------------------------------------------------------------------------------------------------------------------------------------------------------------------------------------------------------------------------------------------------------------------------------------|------------------------------------------------------------------------------------------------------------------------------------------------------------------------------------------------------------------------------------------------------------------------------------------|---------------------------------------------------------------------------------------------------------------------------------------------------------------------------------------------------------------------------------------------------------------------------------------------------------------------------------------------------------------------------------------------------------------------------------------|--------------------------------------|
| Neema, S., Atuyambe, L. M.,<br>Otolok-Tanga, E., Twijukye, C.,<br>Kambugu, A., Thayer, L. and<br>Nelson, B. D., Ahn, R., Fehling,<br>M., Eckardt, M. J., Conn, K. L., El-                                                                                                                         | Using a clinic based creativity<br>initiative to reduce HIV related<br>stigma at the infectious diseases<br>Evaluation of a novel training<br>package among frontline maternal,<br>Peer-based education and the<br>integration of HIV and sexual and<br>reproductive health services for | African Health Sciences<br>12(2): 231-239.<br>International Journal of<br>Gynecology and<br>Gynecology and<br>PLoS ONE 8(11).<br>International Journal of<br>Drug Policy 20(2): 179-<br>AIDS Care - Psychological<br>and Socio-Medical Aspects<br>of AIDS/HIV 22(1): 119-<br>Health Economics (United<br>Kingdom) 21(8): 946-966.<br>Social Science and<br>Medicine 74(7): 989-996.<br>BMC Public Health 11.<br>Malaria Journal 8(1). |                                      |
| Ngo, A. D., Ha, T. H., Rule, J. and<br>Dang, C. V.<br>Ngo, A. D., Schmich, L., Higgs, P.<br>and Fischer, A.<br>Ngongo Bahati, P., Kidega, W.,<br>Ogutu, H., Odada, J., Bender, B.,<br>Fast, P., Becker, J. and Price, M.                                                                          | 2012<br>2012<br>2013<br>2009<br>2010                                                                                                                                                                                                                                                     | 2012<br>2012<br>2012<br>2011<br>2009                                                                                                                                                                                                                                                                                                                                                                                                  | 2012<br>2012<br>2012<br>2011<br>2009 |
| Nguyen, C. V.<br>Nguyen, H. T. H., Hatt, L., Islam,<br>M., Sloan, N. L., Chowdhury, J.,<br>Nguyen, Q. N., Pham, S. T.,<br>Nguyen, V. L., Wall, S.,<br>Njau, R. J. A., De Savigny, D.,<br>Gilson, L., Mwageni, E. and<br>Mosha, F. W.                                                              | 2012<br>2012<br>2012<br>2011<br>2009                                                                                                                                                                                                                                                     | 2012<br>2012<br>2012<br>2011<br>2009                                                                                                                                                                                                                                                                                                                                                                                                  | 2012<br>2012<br>2012<br>2011<br>2009 |
| Njomo, D. W., Mukoko, D. A.,<br>Nyamongo, N. K. and Karanja, J.<br>Nkonki, L. L., Daviaud, E.,<br>Jackson, D., Chola, L., Doherty,                                                                                                                                                                | 2014<br>2014                                                                                                                                                                                                                                                                             | 2014<br>2014                                                                                                                                                                                                                                                                                                                                                                                                                          | 2014<br>2014                         |
| Nooryan, K., Gasparyan, K.,<br>Sharif, F. and Zoladl, M.<br>Nyonator, F. K., Awoonor-<br>Williams, J. K., Phillips, J. F.,<br>Obare, F., Warren, C., Abuya, T.,<br>Askew, I. and Bellows, B.<br>Obure, C. D., Vassall, A.,<br>Michaels, C., Terris-Prestholt, F.,<br>Mayhew, S., Stackpool-Moore, | 2012<br>2005<br>2014<br>2012                                                                                                                                                                                                                                                             | 2012<br>2005<br>2014<br>2012                                                                                                                                                                                                                                                                                                                                                                                                          | 2012<br>2005<br>2014<br>2012         |
| O'Hanlon, K. P. and Budosan, B.<br>Ohnmar, Tun, M., San, S., Than,<br>W. and Chongsuvivatwong, V.<br>Okeibunor, J. C., Onyeneho, N.<br>G., Nwaorgu, O. C., l'Aronu, N.,<br>Okoye, I., Iremeka, F. U. and<br>Okello, F. O., Stuer, F., Kidane, A.<br>and Wube, M.                                  | 2011<br>2012<br>2013<br>2013                                                                                                                                                                                                                                                             | 2011<br>2012<br>2013<br>2013                                                                                                                                                                                                                                                                                                                                                                                                          | 2011<br>2012<br>2013<br>2013         |

- O'Malley, G., Asrat, L., Sharma, A., Hamunime, N., Stephanus, Y., Brandt, L., Ali, D., Kaindjee-Onoka, C. A., Hanson, K. and Onwujekwe, O. E.  
 Onono, M. A., Carraher, N., Cohen, R. C., Bukusi, E. A. and Onwujekwe, O., Dike, N., Ojukwu, J., Uzochukwu, B., Ezumah, N., Shu, E. and Ordóñez, C. A., Pino, L. F., Tejada, J. W., Badiel, M., Loaiza, J. H., Mata, L. V. and Aboutanos, M. B.  
 Orem, J., Mafigiri, D., Marchal, B., Ssengooba, F., MacQ, J. and Criel, B.  
 Otsea, K., Benson, J., Alemayehu, T., Pearson, E. and Healy, J.  
 Ouma, P. O., Van Eijk, A. M., Hamel, M. J., Sikuku, E. S., Odhiambo, F. O., Munguti, K. M., Ouma, P. O., Van Eijk, A. M., Hamel, M. J., Sikuku, E., Odhiambo, F., Munguti, K., Ayisi, Pappas, G., Agha, A., Rafique, G., Khan, K. S., Badruddin, S. H. and Peermohamed, H.  
 Parham, G. P., Mwanahamuntu, M. H., Sahasrabuddhe, V. V., Westfall, A. O., King, K. E., Chibwasha, C., Pfaendler, K. S.,
- Nurse task shifting for antiretroviral treatment services in Namibia:  
 2014 Implementation research to move  
 Low coverage of intermittent  
 2012 preventive treatment for malaria in  
 Use of personal digital assistants for  
 2011 data collection in a multi-site AIDS  
 Consumers stated and revealed  
 preferences for community health  
 2006 workers and other strategies for the  
 Experience of two first level  
 hospitals in the southwest region of  
 2012 Colombia on the implementation of  
 Research, evidence and  
 policymaking: The perspectives of  
 2012 policy actors on improving uptake  
 Testing the Safe Abortion Care  
 2011 model in Ethiopia to monitor  
 Antenatal and delivery care in rural  
 western Kenya: The effect of training  
 2010 health care workers to provide  
 The effect of health care worker  
 training on the use of intermittent  
 2007 preventive treatment for malaria in  
 Community-based approaches to  
 combating malnutrition and poor  
 2008 education among girls in resource-  
 Implementation of cervical cancer  
 prevention services for HIV-infected  
 women in Zambia: Measuring  
 2010 program effectiveness  
 Does mass drug administration for  
 the integrated treatment of  
 2011 neglected tropical diseases really  
 Adverse selection in a community-  
 2012 based health insurance scheme in  
 Running before we walk: How can  
 2007 we maximise the benefits from  
 Implementation of an efficacious  
 intervention for high risk women in  
 2012 Mexico: protocol for a multi-site  
 Strategies to vaccinate against  
 cancer of the cervix: Feasibility of a  
 2011 school-based HPV vaccination
- PLoS ONE 9(3).  
 Malaria Journal 11.  
 African Health Sciences  
 11(3): 464-473.  
 Malaria Journal 5.  
 Revista do Colegio  
 Brasileiro de Cirurgioes  
 39(4): 255-261.  
 BMC Public Health 12(1).  
 International Journal of  
 Gynecology and  
 Reproductive Health 7(1).  
 Tropical Medicine and  
 International Health  
 12(8): 953-961.  
 Rural and remote health  
 8(3): 820.  
 HIV Therapy 4(6): 713-  
 722.  
 Health Research Policy  
 and Systems 9.  
 BMC Health Services  
 Research 12(1).  
 Health Policy 82(3): 288-  
 301.  
 Implementation Science  
 7(1).  
 Vaccine 29(31): 5022-  
 5030.
- Parker, M. and Allen, T.  
 Parmar, D., Souares, A., De  
 Allegri, M., Savadogo, G. and  
 Paterson, M., Green, M. and  
 Maunder, E. M. W.  
 Patterson, T. L., Semple, S. J.,  
 Chavarin, C. V., Mendoza, D. V.,  
 Santos, L. E., Chaffin, M.,  
 Penny, M., Bartolini, R.,  
 Mosqueira, N. R., LaMontagne,  
 D. S., Mendoza, M. A., Ramos, I.,



|                                                                                                                                                                                                                                                                                                                                                                                                                     |      |                                                                                                                                                                                          |                                                               |
|---------------------------------------------------------------------------------------------------------------------------------------------------------------------------------------------------------------------------------------------------------------------------------------------------------------------------------------------------------------------------------------------------------------------|------|------------------------------------------------------------------------------------------------------------------------------------------------------------------------------------------|---------------------------------------------------------------|
| Pérez-Cuevas, R., Doubova, S. V., Suarez-Ortega, M., Law, M., Pande, A. H., Escobedo, J., Pervin, J., Moran, A., Rahman, M., Razzaque, A., Sibley, L., Streatfield, P. K., Reichenbach, L.                                                                                                                                                                                                                          | 2012 | Evaluating quality of care for patients with type 2 diabetes using electronic health record                                                                                              | BMC medical informatics and decision making 12: 50.           |
|                                                                                                                                                                                                                                                                                                                                                                                                                     | 2012 | Association of antenatal care with facility delivery and perinatal survival - a population-based study                                                                                   | BMC Pregnancy and Childbirth 12.                              |
| Petersen, I., Hanass Hancock, J., Bhana, A. and Govender, K.                                                                                                                                                                                                                                                                                                                                                        | 2014 | A group-based counselling intervention for depression comorbid with HIV/AIDS using a task identifying with a process of change:                                                          | Journal of Affective Disorders 158: 78-84.                    |
| Petersen, Z., Nilsson, M., Steyn, K. and Emmelin, M.                                                                                                                                                                                                                                                                                                                                                                | 2013 | A qualitative assessment of the components included in a smoking Pre-and post-intervention                                                                                               | Midwifery 29(7): 751-758.                                     |
| Phaswana-Mafuya, N., Peltzer, K., Ladzani, R., Mlambo, G., Davids, A., Phaweni, K., Dana, P. and Phillips, J. F., Jackson, E. F., Bawah, A. A., Macleod, B.,                                                                                                                                                                                                                                                        | 2011 | assessment of a PMTCT-programme-strengthening initiative in a rural                                                                                                                      | African Journal of AIDS Research 10(1): 83-93.                |
|                                                                                                                                                                                                                                                                                                                                                                                                                     | 2012 | The Long-Term Fertility Impact of the Navrongo Project in Northern                                                                                                                       | Studies in Family Planning 43(3): 175-190.                    |
| Philotheou, G. M.                                                                                                                                                                                                                                                                                                                                                                                                   | 2004 | Distance assisted training in sub-Saharan Africa: A program                                                                                                                              | Journal of Nuclear Medicine Technology                        |
| Pick, S., Givaudan, M. and Brown, J.                                                                                                                                                                                                                                                                                                                                                                                | 2000 | Quietly working for school-based sexuality education in Mexico: Primary care and public health                                                                                           | Reproductive Health Matters 8(16): 92-102.                    |
| Pinto, R. M., Wall, M., Yu, G., Penido, C. and Schmidt, C.                                                                                                                                                                                                                                                                                                                                                          | 2012 | services integration in Brazil's                                                                                                                                                         | American Journal of Public Health 102(11):                    |
| Pirani, S., Naddumba, E., Mathias, R., Konde-Lule, J., Penny, J. N., Beyeza, T., Mbonye, Pitt, C., Diawara, H., Ouédraogo, D. J., Diarra, S., Kaboré, H., Kouéla, K., Traoré, A., Dicko, A., Konaté, A. T., Chandramohan, D., Pongcharoensuk, P., Adisasmito, W., Sat, L. M., Silkavute, P., Potter, D., Goldenberg, R. L., Chao, A., Sinkala, M., Degroot, A., Stringer, J. S. A., Bulterys, M. and Vermund, S. H. | 2009 | Towards effective ponseti clubfoot care: The Uganda sustainable clubfoot care project                                                                                                    | Clinical Orthopaedics and Related Research 467(5): 1154-1163. |
| Powell-Jackson, T., Morrison, J., Tiwari, S., Neupane, B. D. and Power, R., Langhaug, L. F., Nyamurera, T., Wilson, D., Prakash, N. S., Mabry, R. M., Mohamed, A. J. and Alasfoor, D.                                                                                                                                                                                                                               | 2012 | Intermittent preventive treatment of malaria in children: A qualitative study of community perceptions and recommendations in Burkina                                                    | PLoS ONE 7(3).                                                |
| Puett, C., Salpéteur, C., Lacroix, E., Zimunya, S. D., Israël, A. D. Pulford, J., Tandrapah, A., Atkinson, J. A., Kaupa, B., Russell,                                                                                                                                                                                                                                                                               | 2012 | Avian and pandemic human influenza policy in South-East Asia: Do targeted HIV programs improve overall care for pregnant women? Antenatal syphilis management in Zambia before and after | Health Policy and Planning 27(5): 374-383.                    |
|                                                                                                                                                                                                                                                                                                                                                                                                                     | 2008 | The experiences of districts in implementing a national incentive                                                                                                                        | Journal of Acquired Immune Deficiency Syndromes 47(1): 79-85. |
|                                                                                                                                                                                                                                                                                                                                                                                                                     | 2009 | Developing complex interventions for rigorous evaluation - A case study                                                                                                                  | BMC Health Services Research 9.                               |
|                                                                                                                                                                                                                                                                                                                                                                                                                     | 2004 | Implementation of the WHO Multicentre Growth Reference                                                                                                                                   | Health Education Research 19(5): 570-575.                     |
|                                                                                                                                                                                                                                                                                                                                                                                                                     | 2004 | Cost-effectiveness of community vegetable gardens for people living                                                                                                                      | Food and Nutrition Bulletin 25(1 SUPPL. 1):                   |
|                                                                                                                                                                                                                                                                                                                                                                                                                     | 2014 | Feasibility and acceptability of insecticide-treated plastic sheeting                                                                                                                    | Cost Effectiveness and Resource Allocation                    |
|                                                                                                                                                                                                                                                                                                                                                                                                                     | 2012 |                                                                                                                                                                                          | Malaria Journal: 342.                                         |

|                                                                                                                                                                                                                                                                                                                                                                                                                                                                                                                                                                                                                                                                                                                                                                               |                                                                                                                                                                                                                                                                                                                                                                                                                                                                                                                                                                                                                                                                                                                                                                                                                                                                                                                                                                                                                                                                                                                                                                                                                                                                                                                                                                                                  |                                                                                                                                                                                                                                                                                                                                                                                                                                                                                                                                                                                                                                                                                                                                            |
|-------------------------------------------------------------------------------------------------------------------------------------------------------------------------------------------------------------------------------------------------------------------------------------------------------------------------------------------------------------------------------------------------------------------------------------------------------------------------------------------------------------------------------------------------------------------------------------------------------------------------------------------------------------------------------------------------------------------------------------------------------------------------------|--------------------------------------------------------------------------------------------------------------------------------------------------------------------------------------------------------------------------------------------------------------------------------------------------------------------------------------------------------------------------------------------------------------------------------------------------------------------------------------------------------------------------------------------------------------------------------------------------------------------------------------------------------------------------------------------------------------------------------------------------------------------------------------------------------------------------------------------------------------------------------------------------------------------------------------------------------------------------------------------------------------------------------------------------------------------------------------------------------------------------------------------------------------------------------------------------------------------------------------------------------------------------------------------------------------------------------------------------------------------------------------------------|--------------------------------------------------------------------------------------------------------------------------------------------------------------------------------------------------------------------------------------------------------------------------------------------------------------------------------------------------------------------------------------------------------------------------------------------------------------------------------------------------------------------------------------------------------------------------------------------------------------------------------------------------------------------------------------------------------------------------------------------|
| Quayyum, Z., Khan, M. N. U.,<br>Quayyum, T., Nasreen, H. E.,<br>Rabiei, K., Kelishadi, R.,<br>Sarrafzadegan, N., Abedi, H. A.,<br>Alavi, M., Heidari, K., Bahonar,<br>Rajaraman, D., Travasso, S.,<br>Chatterjee, A., Bhat, B., Andrew,<br>G., Parab, S. and Patel, V.<br>Rajatonirina, S., Heraud, J. M.,<br>Randrianasolo, L., Orelle, A.,<br>Razanajatovo, N. H., Raelina, Y.<br>N., Ravolomanana, L.,<br>Rajbhandari, S., Hodgins, S.,<br>Sanghvi, H., McPherson, R.,<br>Pradhan, Y. V. and Baqui, A. H.<br>Rajput, Z. A., Mbugua, S., Amadi,<br>D., Chepn?eno, V., Saleem, J. J.,<br>Anokwa, Y., Hartung, C.,<br>Ramakrishnan, U., Lowe, A., Vir,<br>S., Kumar, S., Mohanraj, R.,<br>Chaturvedi, A., Noznesky, E. A.,<br>Rambu Ngana, F., Myers, B. A.<br>and Belton, S. | Can community level interventions<br>2013 have an impact on equity and<br>Process evaluation of a community-<br>based program for prevention and<br>2009 control of non-communicable<br>The acceptability, feasibility and<br>impact of a lay health counsellor<br>2012 delivered health promoting schools                                                                                                                                                                                                                                                                                                                                                                                                                                                                                                                                                                                                                                                                                                                                                                                                                                                                                                                                                                                                                                                                                       | International Journal for<br>Equity in Health 12(1).<br>BMC Public Health 9.<br>BMC Health Services<br>Research 12(1).                                                                                                                                                                                                                                                                                                                                                                                                                                                                                                                                                                                                                     |
|                                                                                                                                                                                                                                                                                                                                                                                                                                                                                                                                                                                                                                                                                                                                                                               | Short message service sentinel<br>surveillance of influenza-like illness<br>2012 in madagascar, 2008-2012<br>Expanding uterotonic protection<br>following childbirth through<br>2010 community-based distribution of<br>Evaluation of an Android-based<br>mhealth system for population<br>2012 surveillance in developing countries<br>Public health interventions,<br>barriers, and opportunities for<br>improving maternal nutrition in<br>2012 Health reporting system in two<br>subdistricts in Eastern Indonesia:<br>The Mental Health Care Act No 17 -<br>2012 South Africa. Trials and triumphs:<br>The Tanzania Connect Project: A<br>cluster-randomized trial of the child<br>2013 survival impact of adding paid<br>Contracting in specialists for<br>2012 emergency obstetric care- Does it<br>India's Conditional Cash Transfer<br>Programme (the JSY) to Promote<br>2013 Institutional Birth: Is There an<br>Evaluating the McDonald's business<br>model for HIV prevention among<br>2013 truckers to improve program<br>Sustainability of a community-based<br>2014 anti-retroviral care delivery model -<br>Mental health response in Haiti in<br>2012 the aftermath of the 2010<br>Research workshop to research<br>work: Initial steps in establishing<br>2010 health research systems on Malaita,<br>Implementation of tuberculosis<br>2012 infection control measures at HIV | Bulletin of the World<br>Health Organization<br>90(5): 385-389.<br>International Journal of<br>Gynecology and<br>Obstetrics 108(3): 282-<br>Journal of the American<br>Medical Informatics<br>Association 19(4): 655-<br>Food and nutrition<br>bulletin 33(2 Suppl): S71-<br>92.<br>Midwifery 28(6): 809-<br>815.<br>African Journal of<br>Psychiatry (South Africa)<br>BMC Health Services<br>Research 13(SUPPL.2).<br>BMC Health Services<br>Research 12(1).<br>PLoS ONE 8(6).<br>HIV/AIDS - Research and<br>Palliative Care 5: 51-60.<br>Journal of the<br>International AIDS Society<br>Harvard Review of<br>Psychiatry 20(1): 68-77.<br>Health Research Policy<br>and Systems 8.<br>International Journal of<br>Tuberculosis and Lung |
| Ramlall, S.<br>Ramsey, K., Hingora, A., Kante,<br>M., Jackson, E., Exavery, A.,<br>Pemba, S., Manzi, F., Baynes, C.,<br>Randive, B., Chaturvedi, S. and<br>Mistry, N.                                                                                                                                                                                                                                                                                                                                                                                                                                                                                                                                                                                                         |                                                                                                                                                                                                                                                                                                                                                                                                                                                                                                                                                                                                                                                                                                                                                                                                                                                                                                                                                                                                                                                                                                                                                                                                                                                                                                                                                                                                  |                                                                                                                                                                                                                                                                                                                                                                                                                                                                                                                                                                                                                                                                                                                                            |
| Randive, B., Diwan, V. and De<br>Costa, A.                                                                                                                                                                                                                                                                                                                                                                                                                                                                                                                                                                                                                                                                                                                                    |                                                                                                                                                                                                                                                                                                                                                                                                                                                                                                                                                                                                                                                                                                                                                                                                                                                                                                                                                                                                                                                                                                                                                                                                                                                                                                                                                                                                  |                                                                                                                                                                                                                                                                                                                                                                                                                                                                                                                                                                                                                                                                                                                                            |
| Rao, V. T., Mahapatra, B., Juneja,<br>S. and Singh, I. R.<br>Rasschaert, F., Decroo, T.,<br>Remartinez, D., Telfer, B.,<br>Raviola, G., Eustache, E., Oswald,<br>C. and Belkin, G. S.<br>Redman-MacLaren, M. L.,<br>MacLaren, D. J., Solomon, J.,<br>Muse, A., Asugeni, R.,<br>Reid, M., Saito, S., Nash, D.,<br>Scardigli, A., Casalini, C. and                                                                                                                                                                                                                                                                                                                                                                                                                              |                                                                                                                                                                                                                                                                                                                                                                                                                                                                                                                                                                                                                                                                                                                                                                                                                                                                                                                                                                                                                                                                                                                                                                                                                                                                                                                                                                                                  |                                                                                                                                                                                                                                                                                                                                                                                                                                                                                                                                                                                                                                                                                                                                            |

|                                                                                                                                                                                                                                                                                                                  |      |                                                                                                                                                                        |                                                    |
|------------------------------------------------------------------------------------------------------------------------------------------------------------------------------------------------------------------------------------------------------------------------------------------------------------------|------|------------------------------------------------------------------------------------------------------------------------------------------------------------------------|----------------------------------------------------|
| Renggli, S., Mandike, R., Kramer, K., Patrick, F., Brown, N. J., McElroy, P. D., Rimisho, W., Msengwa, A., Mnzava, A.,                                                                                                                                                                                           | 2013 | Design, implementation and evaluation of a national campaign to deliver 18 million free long-lasting insecticidal nets to uncovered                                    | Malaria Journal: 85.                               |
| Renju, J. R., Andrew, B., Medard, L., Kishamawe, C., Kimaryo, M., Changalucha, J. and Obasi, A.                                                                                                                                                                                                                  | 2011 | Scaling up adolescent sexual and reproductive health interventions through existing government systems? A detailed process                                             | Journal of Adolescent Health 48(1): 79-86.         |
| Reza-Paul, S., Lorway, R., O'Brien, N., Lazarus, L., Jain, J., Bhagya, M., Mary, F. P., Venukumar, K. T., Rheinländer, T., Thanh Xuan, L. T., Ngoc Hoat, L., Dalsgaard, A.                                                                                                                                       | 2012 | Sex worker-led structural interventions in India: A case study                                                                                                         | Indian Journal of Medical Research 135(1): 98-106. |
|                                                                                                                                                                                                                                                                                                                  | 2012 | on addressing violence in HIV Hygiene and sanitation promotion strategies among ethnic minority                                                                        | Health Policy and Planning 27(7): 600-612.         |
| Ridde, V. and Diarra, A.                                                                                                                                                                                                                                                                                         | 2009 | A process evaluation of user fees abolition for pregnant women and Why do women pay more than they should? A mixed methods study of the implementation gap in a policy | BMC Health Services Research 9.                    |
| Ridde, V., Kouanda, S., Yameogo, M., Kadio, K. and Bado, A.                                                                                                                                                                                                                                                      | 2012 | Why do women pay more than they should? A mixed methods study of the implementation gap in a policy                                                                    | Evaluation and Program Planning 36(1): 145-152.    |
| Ridde, V., Kouanda, S., Yameogo, M., Kadio, K. and Bado, A.                                                                                                                                                                                                                                                      | 2012 | Effectiveness of a redesigned iron supplementation delivery system for                                                                                                 | Evaluation and Program Planning 36(1): 145-152.    |
| Risonar, M. G. D., Rayco-Solon, P., Tengco, L. W., Sarol Jr, J. N., Rispel, L. C., Peltzer, K., Nkomo, N. and Molomo, B.                                                                                                                                                                                         | 2009 | Evaluating an HIV and AIDS Community Training Partnership                                                                                                              | Public Health Nutrition 12(7): 932-940.            |
| Robert, R. C., Gittelsohn, J., Creed-Kanashiro, H. M., Penny, M. E., Caulfield, L. E., Narro, M. R.                                                                                                                                                                                                              | 2010 | Process evaluation determines the pathway of success for a health center-delivered, nutrition                                                                          | Evaluation and Program Planning 33(4): 394-402.    |
| Rohleder, P., Swartz, L., Schneider, M. and Eide, A. H.                                                                                                                                                                                                                                                          | 2006 | Challenges to providing HIV prevention education to youth with An integrated malaria control                                                                           | Journal of Nutrition 136(3): 634-641.              |
| Rojas, W., Botero, S. and Garcia, H. I.                                                                                                                                                                                                                                                                          | 2012 | program with community Effectiveness of an oral health                                                                                                                 | Disability and Rehabilitation 34(8): 619-629.      |
| Rong, W. S., Bian, J. Y., Wang, W. J. and De Wang, J.                                                                                                                                                                                                                                                            | 2001 | education and caries prevention Alcohol prevention within primary                                                                                                      | Publica 17 Suppl: 103-109.                         |
| Ronzani, T. M., Mota, D. C. B. and de Souza, I. C. W.                                                                                                                                                                                                                                                            | 2003 | care in municipalities in the state of Strategies developed and                                                                                                        | Revista de Saude Publica 43(SUPPL. 1): 51-61.      |
| Rosato, M., Malamba, F., Kunyenge, B., Phiri, T., Mwansambo, C., Kazembe, P., Rosewell, A., Ropa, B., Randall, H., Dagina, R., Hurim, S., Bieb, S., Datta, S., Ramamurthy, S., Mola, Rowe, A. K., De León, G. F. P., Mihigo, J., Santelli, A. C. F., Rowe, A. K., Osterholt, D. M., Kouamé, J., Piercefield, E., | 2009 | implemented by women's groups to improve mother and infant health                                                                                                      | International Health 4(3): 176-184.                |
|                                                                                                                                                                                                                                                                                                                  | 2012 | Mobile phone-based syndromic surveillance system, Papua New Guinea                                                                                                     | Emerging Infectious Diseases 19(11): 1811-1818.    |
|                                                                                                                                                                                                                                                                                                                  | 2013 | Quality of malaria case management at outpatient health facilities in                                                                                                  | Malaria Journal 8(1).                              |
|                                                                                                                                                                                                                                                                                                                  | 2009 | Trends in health worker performance after implementing the                                                                                                             | Tropical Medicine and International Health         |

Royall, J., Bennett, M., Van Schayk, I. and Alilio, M. 2004 Tying up lions: Multilateral initiative on malaria communications: The American Journal of Tropical Medicine and Health Policy and Planning 14(4): 313-321.

Rubardt, M., Chikoko, A., Glik, D., Jere, S., Nwanyanwu, O., Rutebemberwa, E., Kadobera, D., Katureebe, S., Kalyango, J. N., Ryman, T. K., Briere, E. C., Cartwright, E., Schlanger, K., Wannemuehler, K. A., Russo, E. 1999 Implementing a malaria curtains project in rural Malawi Use of community health workers for management of malaria and Integration of routine vaccination and hygiene interventions: A comparison of 2 strategies in Kenya American Journal of Tropical Medicine and Journal of Infectious Diseases 205(SUPPL. 1): S65-S76.

Saboori, S., Greene, L. E., Moe, C. L., Freeman, M. C., Caruso, B. A., Akoko, D. and Rheingans, R. D. 2012 Impact of regular soap provision to primary schools on hand washing and E. coli hand contamination American Journal of Tropical Medicine and Hygiene 89(4): 698-708.

Sadik, S., Abdulrahman, S., Bradley, M. and Jenkins, R. 2011 Integrating mental health into primary health care in Iraq Mental Health in Family Medicine 8(1): 39-49.

Saito, S., Wu, Y., Nankabirwa, V. and Nash, D. 2012 The contribution of antenatal care to the coverage and correlates of HIV STD and AIDS 23(5): 308-317.

Saldanha, L. S., Buback, L., White, J. M., Mulugeta, A., Samandari, R., Kleefeld, S., Hammel, J., Mehta, M. and Sarbani Roy, S., Mahapatra, R., Rath, S., Bajpai, A., Singh, V., Rath, S., Nair, N., Tripathy, P., 2012 Policies and program implementation experience to Privately funded quality health care in India: A sustainable and equitable Quality in Health Care Bulletin of the World Health Organization 91(6): 426-433B.

Sarfraz, M. and Hamid, S. 2001 Improved neonatal survival after participatory learning and action with women's groups: A prospective BMC Pregnancy and Childbirth 14(1).

Sasaki, S., Fujino, Y., Igarashi, K., Tanabe, N., Muleya, C. M. and Suzuki, H. 2013 Challenges in delivery of skilled maternal care - experiences of Access to a health facility and care-seeking for danger signs in children: Before and after a community-based Health Policy 96(2): 98-107.

Schmidt, J. O., Ensor, T., Hossain, A. and Khan, S. 2010 Vouchers as demand side financing instruments for health care: A Impact of integrated community case management on health-seeking behavior in rural Zambia American Journal of Tropical Medicine and Hygiene 87(SUPPL.5): 105-110.

Seidenberg, P. D., Hamer, D. H., Iyer, H., Pilingana, P., Siizeele, K., Hamainza, B., MacLeod, W. B. 2012 Feasibility study of a smoking cessation intervention in Directly Observed Therapy Short-Course American Journal of Infection Control and Hospital Epidemiology Drug Safety 31(10): 867-876.

Sereno, A. B., Soares, E. C. C., Lapa E Silva, J. R., Nápoles, A. M., Bialous, S. A., Da Costa E Silva, V. 2012 Observed Therapy Short-Course Infection control knowledge, attitudes, and practices among Spontaneous adverse drug reaction reporting in rural districts of Promoting appropriate management of diarrhea: A systematic review of literature for Community-based health workers achieve high coverage in neonatal Indian Pediatrics 49(8): 627-649.

Sethi, A. K., Acher, C. W., Kirenga, B., Mead, S., Donskey, C. 2012 Spontaneous adverse drug reaction reporting in rural districts of Promoting appropriate management of diarrhea: A systematic review of literature for Community-based health workers achieve high coverage in neonatal Journal of Health, Population and Nutrition,

Sevene, E., Mariano, A., Mehta, U., MacHai, M., Dodoo, A., Shah, D., Choudhury, P., Gupta, P., Mathew, J. L., Gera, T., Gogia, S., Mohan, P., Panda, R. and Shah, R., Munos, M. K., Winch, P. J., Mullany, L. C., Mannan, I., 2010

|                                                                                                                                                                                                                                                                                                  |                                                                                                                                                                                                                                           |                                                                                             |
|--------------------------------------------------------------------------------------------------------------------------------------------------------------------------------------------------------------------------------------------------------------------------------------------------|-------------------------------------------------------------------------------------------------------------------------------------------------------------------------------------------------------------------------------------------|---------------------------------------------------------------------------------------------|
| Sharifi, H., Hessami, Z. and Masjedi, M. R.                                                                                                                                                                                                                                                      | Health experts' opinions about tobacco control activities in iran: 2012                                                                                                                                                                   | Tanaffos 11(4): 50-55.                                                                      |
| Shei, A.                                                                                                                                                                                                                                                                                         | Brazil's conditional cash transfer program associated with declines in 2013                                                                                                                                                               | Health Affairs 32(7): 1274-1281.                                                            |
| Sherr, K., Cuembelo, F., Michel, C., Gimbel, S., Micek, M., Kariaganis, M., Pio, A., Manuel, J. Shoo, R., Matuku, W., Ileri, J., Nyagero, J. and Gatonga, P.                                                                                                                                     | Strengthening integrated primary health care in Sofala, Mozambique 2013                                                                                                                                                                   | BMC Health Services Research 13(SUPPL.2).<br>The Pan African medical journal 13 Suppl 1: 3. |
| Shrestha, D. R., Shrestha, A. and Ghimire, J.                                                                                                                                                                                                                                                    | The place of knowledge management in influencing lasting 2012                                                                                                                                                                             | Journal of Nepal Health Research Council 10(21):                                            |
| Shrestha, N. R., Kalesan, B., Karki, P., Sherpa, K., Basnet, A., Urban, P. and Pilgrim, T.                                                                                                                                                                                                       | Emerging challenges in family planning programme in Nepal 2012                                                                                                                                                                            |                                                                                             |
| Shrestha, S., Petrini, M. and Turale, S.                                                                                                                                                                                                                                                         | Rheumatic heart disease: Pilot study for a population-based evaluation of 2012                                                                                                                                                            | BMJ Open 2(5).                                                                              |
| Sibanda, E. L., Hatzold, K., Mugurungi, O., Ncube, G., Dupwa, B., Siraha, P., Madyira, L. Sidney, K., De Costa, A., Diwan, V., Mavalankar, D. V. and Smith, Sidney, K., Diwan, V., El-Khatib, Z. and De Costa, A.                                                                                | prevalence and cardiovascular Newborn care in Nepal: The effects of an educational intervention on 2013                                                                                                                                   | International Nursing Review 60(2): 205-211.                                                |
| Sikaala, C. H., Chinula, D., Chanda, J., Hamainza, B., Mwenda, M., Mukali, I., Simwaka, B. N., Theobald, S., Willets, A., Salaniponi, F. M. L., Nkhonjera, P., Bello, G. and Singh, A., Padmadas, S. S., Mishra, U. S., Pallikadavath, S., Singh, A., Pallikadavath, S., Ram, F. and Ogollah, R. | An assessment of the Zimbabwe ministry of health and child welfare provider initiated HIV testing and An evaluation of two large scale demand side financing programs for India's JSY cash transfer program for 2012                      | BMC Health Services Research 12(1).<br>BMC Public Health 12(1).                             |
| Singh, K., Speizer, I., Handa, S., Boadu, R. O., Atinbire, D., Barker, P. M. and Twum-Danso, N. A. Y.                                                                                                                                                                                            | maternal health: Who participates A cost-effective, community-based, mosquito-trapping scheme that captures spatial and temporal Acceptability and Effectiveness of the Storekeeper-Based TB Referral System for TB Suspects in Sub- 2012 | Reproductive Health 9(1).<br>Malaria Journal 13(1).<br>PLoS ONE 7(9).                       |
| Singh, L., Rai, R. K. and Singh, P. K.                                                                                                                                                                                                                                                           | Socio-economic inequalities in the use of postnatal care in india 2012                                                                                                                                                                    | PLoS ONE 7(5).                                                                              |
| Singhal, N., Lockyer, J., Fidler, H., Aziz, K., McMillan, D., Qiu, X., Ma, X., Du, L. and Lee, S. K.                                                                                                                                                                                             | Inequalities in Advice Provided by Public Health Workers to Women 2012                                                                                                                                                                    | PLoS ONE 7(9).                                                                              |
| Sipilanyambe, N., Simon, J. L., Chanda, P., Olumese, P., Snow, Sivaram, S., Srikrishnan, A. K., Murgavel, K. G., Mayer, K. H.,                                                                                                                                                                   | Impact evaluation of a quality improvement intervention on maternal and child health outcomes 2013                                                                                                                                        | International Journal for Quality in Health Care 25(5): 477-487.                            |
|                                                                                                                                                                                                                                                                                                  | Assessing the utilization of maternal and child health care among Acute Care of At-Risk Newborns (ACoRN): Quantitative and qualitative educational evaluation 2012                                                                        | Journal of Biosocial Science 44(1): 1-26.<br>BMC Medical Education 12(1).                   |
|                                                                                                                                                                                                                                                                                                  | From chloroquine to artemether-lumefantrine: The process of drug 2008                                                                                                                                                                     | Malaria Journal 7.                                                                          |
|                                                                                                                                                                                                                                                                                                  | An approach to addressing ethical issues in a community-based risk 2005                                                                                                                                                                   | Journal of Health, Population and Nutrition                                                 |

|                                                                                                                                                                                                                                                                                                             |      |                                                                                                                                                                                                                                                                                                                                                                                                                                                                                                                                |                                                                                                             |
|-------------------------------------------------------------------------------------------------------------------------------------------------------------------------------------------------------------------------------------------------------------------------------------------------------------|------|--------------------------------------------------------------------------------------------------------------------------------------------------------------------------------------------------------------------------------------------------------------------------------------------------------------------------------------------------------------------------------------------------------------------------------------------------------------------------------------------------------------------------------|-------------------------------------------------------------------------------------------------------------|
| Sivhaga, K., Hlabano, B. and Odhiambo, P. O.                                                                                                                                                                                                                                                                | 2012 | Using partnership approach to reduce mortality and morbidity                                                                                                                                                                                                                                                                                                                                                                                                                                                                   | The Pan African medical journal 13 Suppl 1: 14.                                                             |
| Smith, S., Deveridge, A., Berman, J., Negin, J., Mwambene, N., Chingaipe, E., Puchalski Ritchie, Sodhi, S., Banda, H., Kathyola, D., Burciul, B., Thompson, S., Joshua, M., Bateman, E., Fairall, L., Martiniuk, A., Cornick, R., Sodzi-Tettey, S., Aikins, M., Awoonor-Williams, J. K. and Agyepong, I. A. | 2014 | Task-shifting and prioritization: A situational analysis examining the role and experiences of community Evaluating a streamlined clinical tool and educational outreach intervention for health care workers in Malawi: The PALM PLUS case                                                                                                                                                                                                                                                                                    | Human Resources for Health 12(1).<br>BMC International Health and Human Rights 11(SUPPL. 2).                |
| Solomon, Y., Ballif-Spanvill, B., Ward, C., Fuhriman, A. and Songstad, N. G., Lindkvist, I., Moland, K. M., Chimhutu, V. and Blystad, A.                                                                                                                                                                    | 2011 | Challenges in provider payment under the Ghana National Health Insurance Scheme: a case study of The dynamics of community and NGO partnership: primary health Assessing performance enhancing tools: experiences with the open performance review and appraisal system (OPRAS) and expectations Management commitments and primary care: Another lesson from Development of the Community Midwifery Education initiative and its influence on women's health and Intersectoral action for health at a municipal level in Cuba | Ghana medical journal 46(4): 189-199.<br>Promotion & education 15(4): 32-37.<br>Globalization and Health 8. |
| Soors, W., De Paepe, P. and Unger, J. P.                                                                                                                                                                                                                                                                    | 2012 | 2014                                                                                                                                                                                                                                                                                                                                                                                                                                                                                                                           | International Journal of Health Services 44(2): 337-347.                                                    |
| Speakman, E. M., Shafi, A., Sondorp, E., Atta, N. and Howard, N.                                                                                                                                                                                                                                            | 2014 | 2014                                                                                                                                                                                                                                                                                                                                                                                                                                                                                                                           | BMC Women's Health 14(1).                                                                                   |
| Spiegel, J., Alegret, M., Clair, V., Pagliccia, N., Martinez, B., Bonet, Sripad, A., Castedo, J., Danford, N., Zaha, R. and Freile, C.                                                                                                                                                                      | 2012 | 2012                                                                                                                                                                                                                                                                                                                                                                                                                                                                                                                           | International Journal of Public Health 57(1): 15-20.                                                        |
| Ssengooba, F., McPake, B. and Palmer, N.                                                                                                                                                                                                                                                                    | 2014 | 2012                                                                                                                                                                                                                                                                                                                                                                                                                                                                                                                           | International Journal of Tuberculosis and Lung Social Science and Medicine 75(2): 377-383.                  |
| Stein, J., Lewin, S., Fairall, L., Mayers, P., English, R., Bheekie, Steinhardt, L. C. and Peters, D. H.                                                                                                                                                                                                    | 2008 | 2012                                                                                                                                                                                                                                                                                                                                                                                                                                                                                                                           | BMC Health Services Research 8.                                                                             |
| Stephens, T. T., Oriuwa, C. L. and Uzoho, M.                                                                                                                                                                                                                                                                | 2010 | 2010                                                                                                                                                                                                                                                                                                                                                                                                                                                                                                                           | International Journal for Equity in Health 9.                                                               |
| Stevens, E. R., Aldridge, A., Degbey, Y., Pignandi, A., Steyn, K., Lombard, C., Nomonde, G., Fourie, J. M., Katherine, E.-M., Merrick, Z. and Subitha, L., Bala Soudarssanane, M. and Murugesan, R.                                                                                                         | 1999 | 1999                                                                                                                                                                                                                                                                                                                                                                                                                                                                                                                           | Tropical Doctor 29(1): 12-18.                                                                               |
| Suhaili, M. R., Hosein, E., Mokhtar, Z., Ali, N., Palmer, K.                                                                                                                                                                                                                                                | 2013 | 2013                                                                                                                                                                                                                                                                                                                                                                                                                                                                                                                           | Malaria Journal 12(1).                                                                                      |
|                                                                                                                                                                                                                                                                                                             | 2013 | 2013                                                                                                                                                                                                                                                                                                                                                                                                                                                                                                                           | Global Health Action 6(1).<br>National Medical Journal of India 26(1): 12-17.                               |
|                                                                                                                                                                                                                                                                                                             | 2004 | 2004                                                                                                                                                                                                                                                                                                                                                                                                                                                                                                                           | Dengue Bulletin 28(SUPPL.): 39-43.                                                                          |

- Sun, J., Buys, N. and Wang, X. 2013 Effectiveness of a workplace-based intervention program to promote mental health among employees in Effects of a randomized intervention to improve workplace social capital Population Health Management 16(6): 406-414.
- Sun, X., Zhang, N., Liu, K., Li, W., Oksanen, T. and Shi, L. 2014 Lymphatic filariasis elimination programme in Andaman and Nicobar Islands, India: Drug A follow-up study of *Opisthorchis viverrini* infection after the implementation of control program PLoS ONE 9(12). Tropical Doctor 43(1): 30-32.
- Sunish, I. P., Shriram, A. N., Sivan, A., Kartick, C., Saha, B. P. and Vijayachari, P. 2013 A follow-up study of *Opisthorchis viverrini* infection after the implementation of control program Parasites and Vectors 6(1). SAHARAJ : journal of Social Aspects of HIV/AIDS Research Alliance / SAHARA , Human Sciences Public Health 126(10): 839-845.
- Suwannahitatorn, P., Klomjit, S., Naaglor, T., Taamasri, P., Rangsin, R., Leelayoova, S. and Swartz, S., Deutsch, C., Makoae, M., Michel, B., Harding, J. H., Garzouzie, G., Rozani, A., Runciman, T. and Van der 2012 Measuring change in vulnerable adolescents: findings from a peer education evaluation in South Africa Why do community health workers volunteer? A qualitative study in Changes in stigma and discrimination of onchocerciasis in Africa Mapping of schistosomiasis and soil-transmitted helminthiasis in the regions of centre, East and West Cameroon PLoS Neglected Tropical Diseases 6(3).
- Takasugi, T. and Lee, A. C. K. 2012 Why do community health workers volunteer? A qualitative study in Changes in stigma and discrimination of onchocerciasis in Africa Mapping of schistosomiasis and soil-transmitted helminthiasis in the regions of centre, East and West Cameroon Assessing the accuracy and feasibility of a refractive error screening program conducted by Human resource development for a community-based health extension Surviving sepsis campaign in Brazil Involving expert patients in antiretroviral treatment provision Coverage and costs of mass immunization of an oral cholera vaccine in Vietnam Evaluation of a case management program for HIV clients in Rwanda Pharmacological intervention of pre-eclampsia and eclampsia: A case School-based mental health intervention for children in war-affected Burundi: A cluster Takasugi, T. and Lee, A. C. K. 2012 Transactions of the Royal Society of Tropical Medicine and Hygiene PLoS ONE 9(6). Human Resources for Health 11(1). Shock 30(SUPPL. 1): 47-52. BMC Health Services Research 12(1). Journal of Health, Population and Nutrition 21(4): 304-308. AIDS Care - Psychological and Socio-Medical Aspects of AIDS/HIV 22(6): 759-762. Drug Invention Today 4(4): 360-362. BMC Medicine 12(1).
- Tchounkeu, Y. F. L., Onyeneho, N. G., Wanji, S., Kabali, A. T., Manianga, C., Amazigo, U. V. and Tchuenté, L. A. T., Ngassam, R. I. K., Sumo, L., Ngassam, P., Noumedem, C. D., Nzu, D. D. L., Dankoni, E., Kenfack, C. M., Teerawattananon, K., Myint, C. Y., Wongkittirux, K., Teerawattananon, Y., Teklehaimanot, H. D. and Teklehaimanot, A. 2013
- Teles, J. M. M., Silva, E., Westphal, G., Costa Filho, R. and Tenthani, L., Cataldo, F., Chan, A. K., Bedell, R., Martiniuk, A. L. and Thiem, V. D., Hossain, M. M., Son, N. D., Hoa, N. T., Rao, M. R., Canh, D. G., Naficy, A., Ke, N. T., Thurman, T. R., Haas, L. J., Dushimimana, A., Lavin, B. and Mock, N. 2010
- Tiemo, S. J., Wannang, N. N., Sariem, C. N., Auta, A. and Tol, W. A., Komproe, I. H., Jordans, M. J. D., Ndayisaba, A., Ntamutumba, P., Sipsma, H., 2014

|                                                                                                                                                                             |      |                                                                                                     |                                                                              |
|-----------------------------------------------------------------------------------------------------------------------------------------------------------------------------|------|-----------------------------------------------------------------------------------------------------|------------------------------------------------------------------------------|
| Tomczyk, S., Tamiru, A. and Davey, G.                                                                                                                                       | 2012 | Addressing the neglected tropical disease podoconiosis in Northern Ethiopia: Lessons learned from a | PLoS Neglected Tropical Diseases 6(3).                                       |
| Tomlinson, M., Solomon, W., Singh, Y., Doherty, T., Chopra, Topp, S. M., Chipukuma, J. M., Chiko, M. M., Matongo, E.,                                                       | 2009 | The use of mobile phones as a data collection tool: A report from a                                 | BMC Medical Informatics and Decision Making 9(1).                            |
|                                                                                                                                                                             | 2013 | Integrating HIV treatment with primary care outpatient services: Factors related to discontinued    | BMC Public Health 12(1).                                                     |
| Tora, A., Davey, G. and Tadele, G.                                                                                                                                          | 2012 | clinic attendance by patients with New strategy toward dioxin risk                                  | Global Health Action 6(1).                                                   |
| Tran, T. H. T., Nguyen, N. B. and Le, V. A.                                                                                                                                 | 2013 | reduction for local residents Developing nursing capacity for                                       | MEDICC Review 14(3): 12-18.                                                  |
| Trujillo, N. M.                                                                                                                                                             | 2012 | health systems and services research Clinical governance: A lever for                               | Clinical Governance 17(3): 223-247.                                          |
| Tuan, L. T.                                                                                                                                                                 | 2012 | change in Nhan Dan Gia Dinh The acceptability and feasibility of                                    | BMC Pregnancy and Childbirth 13.                                             |
| Tucker, K., Ochoa, H., Garcia, R., Sievwright, K., Chambliss, A. and Turab, A., Pell, L. G., Bassani, D. G., Soofi, S., Ariff, S., Bhutta, Z. A. and Morris, S. K.          | 2013 | an intercultural birth center in the The community-based delivery of an                             | BMC Pregnancy and Childbirth 14(1).                                          |
|                                                                                                                                                                             | 2014 | innovative neonatal kit to save newborn lives in rural Pakistan: Community-based antenatal          | Health Policy and Planning 18(4): 391-398.                                   |
| Turan, J. M. and Say, L.                                                                                                                                                    | 2003 | education in Istanbul, Turkey: Mapping of initiatives to increase                                   | International Journal for Equity in Health 11(1).                            |
| Turcotte-Tremblay, A. M., Haddad, S., Yacoubou, I. and Umble, K., Bain, B., Ruddock-Small, M., Mahanna, E. and Uneke, C. J., Ezeoha, A. E., Ndukwe, C. D., Oyibo, P. G. and | 2012 | membership in mutual health Strengthening responses to the HIV/AIDS pandemic: an internal           | Education for health (Abingdon, England) Global Public Health 7(7): 750-765. |
|                                                                                                                                                                             | 2012 | Promotion of evidence-informed health policymaking in Nigeria: Health system barriers to            | Tropical Medicine and International Health 17(5): 658-665.                   |
| Uwimana, J., Jackson, D., Hausler, H. and Zarowsky, C.                                                                                                                      | 2012 | implementation of collaborative TB and HIV activities including Engagement of non-government        | BMC Health Services Research 12(1).                                          |
|                                                                                                                                                                             | 2012 | organisations and community care workers in collaborative TB/HIV                                    | International Journal of Gynecology and                                      |
| Uwimana, J., Zarowsky, C., Hausler, H. and Jackson, D.                                                                                                                      | 2012 | activities including prevention of There are some questions you may                                 | Bulletin of the World Health Organization                                    |
| Vahdat, H. L., L'Engle, K. L., Plourde, K. F., Magaria, L. and Van de Poel, E., Flores, G., Ir, P., O'Donnell, O. and Van                                                   | 2013 | not ask in a clinic: Providing Can vouchers deliver? An evaluation                                  | Health Organization                                                          |
| Van Den Berg, H., Velayudhan, R., Ebol, A., Catbagan, B. H., Van den Broucke, S., Jooste, H., Tlali, M., Moodley, V., Van Zyl,                                              | 2014 | of subsidies for maternal health care Operational efficiency and                                    | Malaria Journal 11.                                                          |
|                                                                                                                                                                             | 2012 | sustainability of vector control of Strengthening the capacity for                                  | Global health promotion 17(2 Suppl): 6-16.                                   |
| Van Den Heever, A. M.                                                                                                                                                       | 2010 | health promotion in South Africa The role of insurance in the                                       | BMC Public Health 12(SUPPL. 1).                                              |
|                                                                                                                                                                             | 2012 | achievement of universal coverage                                                                   |                                                                              |



- Van Lettow, M., Bedell, R., Mayuni, I., Mateyu, G., Landes, M., Chan, A. K., Van Schoor, V., Beyene, T., Harries, A. D., Chu, S., Vedanthan, R., Kamano, J. H., Horowitz, C. R., Ascheim, D., Venancio, S. I., Saldiva, S. R. D. M., Escuder, M. M. L. and Viegas Andrade, M., Noronha, K., Singh, A., Rodrigues, C. G. and
- Vince, J. D., Datta, S. S., Toikilik, S. and Lagani, W.
- Vir, S. C., Kalita, A., Mondal, S. and Malik, R.
- Vossius, C., Lotto, E., Lyanga, S., Mduma, E., Msemu, G., Perlman, Vyas, R., Zacharah, A., Swamidasan, I., Doris, P. and Wagman, J. A., Namatovu, F., Nalugoda, F., Kiwanuka, D., Wagstaff, A., Lindelow, M., Jun, G., Ling, X. and Juncheng, Q.
- Wahlström, R., Kounnavong, S., Sisounthone, B., Phanyanouvong, A.,
- Walsh, A., Mulambia, C., Brugha, R. and Hanefeld, J.
- Wamai, R. G., Ayissi, C. A., Oduwo, G. O., Perlman, S., Welty, E., Manga, S. and Wang, A. L., Peng, R. R., Tucker, J. D., Cohen, M. S. and Chen, X. S.
- Wang, C., Xiang, H., Xu, Y., Hu, D., Zhang, W., Lu, J., Sun, L. and Wang, H., Liu, Y., Zhu, Y., Xue, L., Dale, M., Sipsma, H. and Bradley, Wangalwa, G., Cudjoe, B., Wamalwa, D., Machira, Y., Ofware, P., Ndirangu, M. and
- Waq, G., Moodie, M., Schultz, J. and Swinburn, B.
- Watkinson-Powell, A. and Lee, A.
- Towards elimination of mother-to-child transmission of HIV: Performance of different models of care for initiating lifelong Nurse management of hypertension in Rural Western Kenya: The Baby-Friendly Hospital Initiative shows positive effects on Antenatal care use in Brazil and India: Scale, outreach and Integrated package approach in delivering interventions during immunisation campaigns in a Impact of community-based mitanin programme on Cost-effectiveness of the "Helping Babies Breathe" program in a Blended distance education program for junior doctors working A Public Health Approach to Intimate Partner Violence Extending health insurance to the rural population: An impact Effectiveness of feedback for improving case management of malaria, diarrhoea and pneumonia - The problem is ours, it is not CRAIDS' . Evaluating sustainability of Community Based Organisations for Assessing the effectiveness of a community-based sensitization strategy in creating awareness about Partner notification uptake for sexually transmitted infections in Improving emergency preparedness capability of rural public health Health Insurance Benefit Design and Healthcare Utilization in Northern Effectiveness of Kenya's Community Health Strategy in delivering community-based maternal and Process evaluation of a community-based intervention program: Healthy Youth Healthy Benefits of an Electronic Medical Records System in rural Nepal
- Journal of the International AIDS Society 17.
- Annals of Global Health 80(1): 5-12.
- Journal of Epidemiology and Community Health 18(5): 942-950.
- Vaccine 32(36): 4614-4619.
- Food and nutrition bulletin 35(1): 83-91.
- PLoS ONE 9(7).
- Rural and remote health 14: 2420.
- Violence Against Women 18(12): 1390-1412.
- Journal of Health Economics 28(1): 1-19.
- Tropical Medicine and International Health 8(10): 901-909.
- Globalization and Health 8.
- Journal of Community Health 37(5): 917-926.
- Sexually Transmitted Infections 88(5): 386-399.
- Public Health 124(6): 339-344.
- PLoS ONE 7(11).
- The Pan African medical journal 13 Suppl 1: 12.
- Global Health Promotion 20(4): 23-34.
- Journal of the Nepal Medical Association

- Weaver, M. R., Crozier, I., Eleku, S., Makanga, G., Mpanga Sebuyira, L., Nyakake, J., Webster, P. D., Sibanyoni, M., Malekutu, D., Mate, K. S., Venter, Wei, X., Yin, J., Zou, G., Walley, J., Zhong, J., Chen, S., Sun, Q. and Wei, X., Zou, G., Gong, W., Yin, J., Yu, Y., Walley, J., Zhang, Z., King, R., Chen, K., Chong, M. K. West, B., Abatemarco, D., Ohman-Strickland, P. A., Zec, V.,
- Wiegert, K., Dinh, T. H., Mushavi, A., Mugurungi, O. and Kilmarx, P. H.
- Williams, A. B., Wang, H., Burgess, J., Li, X. and Danvers, K. Winch, P. J., Gilroy, K. E., Doumbia, S., Patterson, A. E., Daou, Z., Diawara, A., Swedberg, E., Black, R. E., Fontaine, O., Bouaré, F., Coulibaly, S., Wiysonge, C. S., Ngcobo, N. J., Jeena, P. M., Madhi, S. A., Schoub, B. D., Hawkrigde, A.,
- Wong, R. and Bradley, E. H. Wouters, E., Masquillier, C., Ponnet, K. and le Roux Booyesen, F.
- Wu, V., Nguyen, M., Nhi, H. M., Thanh, V., Opreescu, F., Cook, T.
- Xiang, X., Yang, C., Wang, D., Ye, J. and Zhang, X.
- Xu, C., Wang, Z. and Gericke, C. A.
- Xu, F., Wang, X., Ware, R. S., Tse, L. A., Wang, Z., Hong, X., Chan, E. Y. Y., Li, J. and Wang, Y.
- Xu, F., Ware, R. S., Tse, L. A., Wang, Z., Hong, X., Song, A., Li, J. and Wang, Y.
- Capacity-Building and Clinical Competence in Infectious Disease in Uganda: A Mixed-Design Study with Using quality improvement to accelerate highly active Patient care pathways under the model of integrating tuberculosis Cardiovascular disease risk reduction in rural China: A clustered randomized controlled trial in Project Northland in Croatia: Results and lessons learned Integration of prevention of mother-to-child transmission of HIV (PMTCT) postpartum services with other HIV care and treatment services within Cultural adaptation of an evidence-based nursing intervention to improve medication adherence
- Operational issues and trends associated with the pilot introduction of zinc for childhood diarrhoea in Bougouni District, Mali Advances in childhood immunisation in South Africa: Where to now? Programme Developing patient registration and medical records management A peer adherence support intervention to improve the antiretroviral treatment outcomes Evaluation of the progress and challenges facing the Ponseti Effects of China's national essential medicines policy on the use of injection in primary health facilities The attitude of farmers to the New Rural Cooperative Medical Scheme in Northwest China one year after its A school-based comprehensive lifestyle intervention among Chinese kids against Obesity (CLICK-Obesity) A school-based comprehensive lifestyle intervention among chinese kids against obesity (CLICK-Obesity):
- 2012  
2012  
2013  
2013  
2013  
2008  
2014  
2013  
2008  
2012  
2009  
2014  
2012  
2012  
2012  
2012  
2014  
2014  
2012
- PLoS ONE 7(12).  
BMJ Quality and Safety 21(4): 315-324.  
Tropical Medicine and International Health  
Trials 14(1).  
Journal of Drug Education 38(1): 55-70.  
PLoS ONE 9(6).  
International Journal of Nursing Studies 50(4): 487-494.  
Journal of Health, Population and Nutrition 26(2): 151-163.  
BMC Public Health 12(1).  
International Journal for Quality in Health Care  
Social Science and Medicine 113: 145-153.  
The Iowa orthopaedic journal 32: 125-134.  
Journal of Huazhong University of Science and Technology - Medical Journal of Public Health (Germany) 20(3): 235-243.  
Asia Pacific Journal of Clinical Nutrition 23(1): 48-54.  
BMC Public Health 12(1).

|                                                                                                                                    |      |                                                                                                                      |                                                   |
|------------------------------------------------------------------------------------------------------------------------------------|------|----------------------------------------------------------------------------------------------------------------------|---------------------------------------------------|
| Xu, T., Wang, H., Gong, L., Ye, H., Yu, R., Wang, D., Wang, L., Feng,                                                              | 2014 | The impact of an intervention package promoting effective health interventions in low and middle income countries? A | Resuscitation 85(2): 253-259.                     |
| Yamey, G.                                                                                                                          | 2012 | What are the barriers to scaling up Malaria control in Bhutan: Case study of a country embarking on                  | Globalization and Health 8.                       |
| Yangzom, T., Gueye, C., Namgay, R., Galappaththy, G. N., Thimasarn, K., Gosling, R., Yao, J., Agadjanian, V. and Murray, A. T.     | 2012 | elimination                                                                                                          | Malaria Journal 11.                               |
| Yip, W. C. M., Hsiao, W. C., Chen, W., Hu, S., Ma, J. and Maynard, Yitayal, M., Berhane, Y., Worku, A. and Kebede, Y.              | 2014 | Spatial and social inequities in HIV testing utilization in the context of                                           | Health and Place 28: 133-141.                     |
|                                                                                                                                    | 2012 | Early appraisal of China's huge and complex health-care reforms                                                      | The Lancet 379(9818): 833-842.                    |
|                                                                                                                                    | 2014 | The community-based Health Extension Program significantly                                                           | Journal of Multidisciplinary                      |
|                                                                                                                                    | 2012 | Support for children identified with acute flaccid paralysis under the global polio eradication programme            | BMC Public Health 12(1).                          |
| Yotsu, R. R., Abba, K., Smith, H. and Das, A.                                                                                      | 2012 | Study on student health literacy gained through health education in                                                  | Health Education Journal 71(4): 452-460.          |
| Yu, X., Yang, T., Wang, S. and Zhang, X.                                                                                           | 2014 | A description of malaria sentinel surveillance: A case study in Oromia Regional State, Ethiopia                      | Malaria Journal 13(1).                            |
| Yukich, J. O., Butts, J., Miles, M., Berhane, Y., Nahusenay, H., Malone, J. L., Dissanayake, G.,                                   | 2012 | Pilot study for evidence-based nursing management: Improving the levels of job satisfaction,                         | Nursing and Health Sciences 14(2): 221-228.       |
| Yurumezoglu, H. A. and Kocaman, G.                                                                                                 | 2012 | Effectiveness of involving the private medical sector in the National TB Control Programme in Bangladesh:            | BMJ Open 2(6).                                    |
| Zafar Ullah, A. N., Huque, R., Husain, A., Akter, S., Islam, A. and Newell, J. N.                                                  | 2012 | Context matters in NGO-government contracting for health                                                             | Health Policy and Planning 27(7): 570-581.        |
| Zaidi, S., Mayhew, S. H., Cleland, J. and Green, A. T.                                                                             | 2012 | Inequities in maternal and child health outcomes and interventions                                                   | BMC Public Health 12(1).                          |
| Zere, E., Kirigia, J. M., Duale, S. and Akazili, J.                                                                                | 2012 | Smartphone versus pen-and-paper data collection of infant feeding practices in rural China                           | Journal of Medical Internet Research 14(5).       |
| Zhang, S., Wu, Q., Van Velthoven, Q. W. M. H. M. M. T., Chen, L., Car, J., Rudan, I., Zhang, Y., Li, Y.                            | 2014 | The effects of China's urban basic medical insurance schemes on the equity of health service utilisation:            | International Journal for Equity in Health 13(1). |
| Zhou, Z., Zhu, L., Zhou, Z., Li, Z., Gao, J. and Chen, G.                                                                          | 2014 | Benefits of using vaccines out of the cold chain: Delivering Meningitis A vaccine in a controlled temperature        | Vaccine 32(13): 1431-1435.                        |
| Zipursky, S., Djingarey, M. H., Lodjo, J. C., Olodo, L., Tiendrebeogo, S. and Ronveaux, Zulkifli, S. N., Yun-Low, W. and Yusof, K. | 1998 | Role of schools of public health on maternal and child health                                                        | Asia-Pacific Journal of Public Health 10(1): 10-  |
| Zurovac, D., Larson, B. A., Sudoi, R. K. and Snow, R. W.                                                                           | 2012 | Costs and Cost-Effectiveness of a Mobile Phone Text-Message Reminder Programmes to Improve                           | PLoS ONE 7(12).                                   |

|                                                                                                                                                                                                                                |      |                                                                                                                                                                                               |                                                     |
|--------------------------------------------------------------------------------------------------------------------------------------------------------------------------------------------------------------------------------|------|-----------------------------------------------------------------------------------------------------------------------------------------------------------------------------------------------|-----------------------------------------------------|
| Z. Anwari, M. Shukla, B. A. Maseed, G. F. M. Wardak, S. Sardar, J. Matin, G. S. Rashed, S. A. Edward, K. Osei-Bonsu, C. Branchini, T. S. Yarghal, S. H. Arwal and A. J. Naeem                                                  | 2015 | Implementing people-centred health systems governance in 3 provinces and 11 districts of Enhancing governance and health system accountability for people centered healthcare: An exploratory | Conflict and Health<br>BMC Health Services Research |
| J. M. Smith, J. De Graft-Johnson, P. Zyaee, J. Ricca and J. Fullerton                                                                                                                                                          | 2015 | Scaling up high-impact interventions: How is it done?                                                                                                                                         | International Journal of Gynecology and             |
| J. Haver, N. Ansari, P. Zainullah, Y. M. Kim and H. Tappis                                                                                                                                                                     | 2016 | Misoprostol for Prevention of Postpartum Hemorrhage at Home                                                                                                                                   | Journal of Midwifery and Women's Health             |
| I. Craveiro and G. Dussault                                                                                                                                                                                                    | 2016 | The impact of global health initiatives on the health system in                                                                                                                               | Global Public Health                                |
| V. Rodriguez, C. Giuffre, S. Villa, G. Almada, N. Prasopa-Plaizier, M. Gogna, L. Gibbons, E. G. Elorrio, W. Alcala, G. Almada, C. Alvarez, S. Margalejo, P. Montero, I. Romano, M. Scherer, C. Silva, C. Spira, F. Althabe, E. | 2015 | A multimodal intervention to improve hand hygiene in ICUs in Buenos Aires, Argentina: A stepped wedge trial                                                                                   | International Journal for Quality in Health Care    |
| L. Belaid and V. Ridde                                                                                                                                                                                                         | 2015 | Contextual factors as a key to understanding the heterogeneity of                                                                                                                             | Health Policy and Planning                          |
| T. Druetz, F. Fregonese, A. Bado, T. Millogo, S. Kouanda, S. Diabaté and S. Haddad                                                                                                                                             | 2015 | Abolishing fees at health centers in the context of community case management of malaria: What                                                                                                | PLoS ONE                                            |
| I. Agier, A. Ly, K. Kadio, S. Kouanda and V. Ridde                                                                                                                                                                             | 2016 | Endorsement of universal health coverage financial principles in                                                                                                                              | Social Science and Medicine                         |
| K. Tesfazghi, A. Traore, H. Ranson, S. N'Fale, J. Hill and E. Worrall                                                                                                                                                          | 2016 | Challenges and opportunities associated with the introduction of next-generation long-lasting                                                                                                 | Implementation Science                              |
| M. S. Awadhalla, G. V. Asokan, A. Matooq and R. Kirubakaran                                                                                                                                                                    | 2016 | Declining trends in injuries and ambulance calls for road traffic                                                                                                                             | Journal of Epidemiology and Global Health           |
| M. E. Hoque, S. K. Dasgupta, E. Naznin and A. Al Mamun                                                                                                                                                                         | 2015 | Household coping strategies for delivery and related healthcare cost:                                                                                                                         | Tropical Medicine and International Health          |
| N. L. Huq, A. Ahmed, N. Haque, M. Hossaine, J. Uddin, F. Ahmed and M. A. Quaiyum                                                                                                                                               | 2015 | Effect of an integrated maternal health intervention on skilled provider's care for maternal health                                                                                           | BMC Pregnancy and Childbirth                        |
| S. Ahmed, M. E. Hoque, A. R. Sarker, M. Sultana, Z. Islam, R. K. Z. Ahsan, P. K. Streatfield, E. I. Rashida, G. M. Escudero, A. W. E. Gama, J. Madan, I. Langley, M. Girma, D. Evans, S. Rosen and S. B. Squire                | 2016 | Willingness-to-pay for community-based health insurance among                                                                                                                                 | PLoS ONE                                            |
| G. B. Damien, A. Djènontin, E. Chaffa, S. Yamadjako, P. M. Drame, E. E. Ndille, M. C. Henry,                                                                                                                                   | 2016 | Fifteen years of sector-wide approach (SWAp) in Bangladesh                                                                                                                                    | Health Policy and Planning                          |
|                                                                                                                                                                                                                                | 2016 | Economic evaluation of a shortened standardised treatment regimen of antituberculosis drugs for patients                                                                                      | BMJ Open                                            |
|                                                                                                                                                                                                                                | 2016 | Effectiveness of insecticidal nets on uncomplicated clinical malaria: A case-control study for operational                                                                                    | Malaria Journal                                     |

|                                                                                                                                                                                                                           |      |                                                                                                                                                                                                                     |                                                   |
|---------------------------------------------------------------------------------------------------------------------------------------------------------------------------------------------------------------------------|------|---------------------------------------------------------------------------------------------------------------------------------------------------------------------------------------------------------------------|---------------------------------------------------|
| I. L. Lange, L. Kanhonou, S. Goufodji, C. Ronsmans and V. D. S. Brandão, S. I. Venancio and E. R. J. Giugliani                                                                                                            | 2016 | The costs of 'free': Experiences of facility-based childbirth after Association between the Brazilian Breastfeeding Network                                                                                         | Social Science and Medicine                       |
| S. Yanagisawa, A. Soyano, H. Igarashi, M. Ura and Y. Nakamura                                                                                                                                                             | 2015 | Effect of a maternal and child health handbook on maternal knowledge and behaviour: A community-based Evaluation of intensified behaviour change communication strategies in an artemisinin resistance setting      | Jornal de Pediatria                               |
| S. E. Canavati, C. Z. De Beyl, P. Ly, M. Shafique, T. Boukheng, C. Rang, M. A. Whittaker, A. Roca-S. E. Canavati, C. E. Quintero, H. L. S. Lawford, S. Yok, D. Lek, J. S. Richards and M. A. Whittaker                    | 2016 | High mobility, low access thwarts interventions among seasonal workers in the Greater Mekong Sub-Implementation research: A mentoring programme to improve Targeting the poorest in a performance-based financing   | Health Policy and Planning                        |
| L. A. Perrone, V. Voeurng, S. Sek, S. Song, N. Vong, C. Tous, J. F. I. J. E. Flink, R. Ziebe, D. Vagaï, F. Van De Looij, H. Van 'T Riet and T. F. K. Koo, X. Chen, E. P. F. Chow, J. Jing, J. Zheng, J. Zhao and L. Zhang | 2016 | Barriers and potential improvements for needle and syringe exchange programs (NSPs) in Task shifting of HIV/AIDS case management to Community Health                                                                | Malaria Journal                                   |
| F. Ma, F. Lv, P. Xu, D. Zhang, S. Meng, L. Ju, H. Jiang, L. Ma, J. K. E. Muessig, C. H. Bien, C. Wei, E. J. Lo, M. Yang, J. D. Tucker, L. Yang, G. Meng and L. B. Hightow-                                                | 2016 | A mixed-methods study on the acceptability of using eHealth for HIV prevention and sexual health Evaluation of the implementation outcomes of the Essential Medicines System in Anhui county-level public           | Bulletin of the World Health Organization         |
| S. Xu, C. Bian, H. Wang, N. Li, J. Wu, P. Li and H. Lu                                                                                                                                                                    | 2015 | Implementation of the tobacco-free campus policy on college campuses: Acceptability of Voluntary Medical Male circumcision (VMMC) among                                                                             | Health Policy and Planning                        |
| M. Gong, Z. Y. Liang, Y. Y. Zhang, W. G. Shadel, L. Zhou and J. Xiao                                                                                                                                                      | 2016 | Male sexually transmitted diseases Comparing maternal services utilization and expense reimbursement before and after the Sustaining the control of schistosoma mansoni in western côte d'ivoire: Baseline findings | PLoS ONE                                          |
| Z. Wang, T. Feng, J. T. F. Lau and Y. Kim                                                                                                                                                                                 | 2016 | Implementation and Operational Research: Programmatic Feasibility of Dried Blood Spots for the Virological Follow-up of Patients on                                                                                 | BMC Health Services Research                      |
| H. You, H. Gu, W. Ning, H. Zhou and H. Dong                                                                                                                                                                               | 2016 | Feasibility and implementation of community-based malaria case management with integrated vector                                                                                                                    | Journal of Medical Internet Research              |
| R. K. Assaré, E. Hürlimann, M. Ouattara, N. A. N'Guessan, Y. N. T. Tian-Bi, A. Yapi, P. K. Yao, J. T. F. Boillot, L. Serrano, J. Muwonga, J. P. Kabuayi, A. Kambale, F. Mutaka, P. I. Fujiwara, J. Decosas, M. Peeters    | 2016 |                                                                                                                                                                                                                     | BMC Health Services Research                      |
| E. K. Swana, G. Y. Makan, C. K. Mukeng, H. I. Mupumba, G. M. Kalaba, O. N. Luboya and M. J.                                                                                                                               | 2016 |                                                                                                                                                                                                                     | Nicotine and Tobacco Research                     |
|                                                                                                                                                                                                                           | 2016 |                                                                                                                                                                                                                     | PLoS ONE                                          |
|                                                                                                                                                                                                                           | 2016 |                                                                                                                                                                                                                     | PLoS ONE                                          |
|                                                                                                                                                                                                                           | 2016 |                                                                                                                                                                                                                     | American Journal of Tropical Medicine and Hygiene |
|                                                                                                                                                                                                                           | 2016 |                                                                                                                                                                                                                     | Journal of Acquired Immune Deficiency Syndromes   |
|                                                                                                                                                                                                                           | 2016 |                                                                                                                                                                                                                     | Malaria Journal                                   |

|                                                                                                                                                                                                                                                                                                                                |      |                                                                                                                                                               |                                                                        |
|--------------------------------------------------------------------------------------------------------------------------------------------------------------------------------------------------------------------------------------------------------------------------------------------------------------------------------|------|---------------------------------------------------------------------------------------------------------------------------------------------------------------|------------------------------------------------------------------------|
| J. Maslowsky, S. Frost, C. E. Hendrick, F. O. Trujillo Cruz and A. Brasington, A. Abdelmegeid, V. Dwivedi, A. Kols, Y. M. Kim, N. Khadka, B. Rawlins and A. Gibson                                                                                                                                                             | 2016 | Effects of postpartum mobile phone-based education on maternal and Promoting healthy behaviors among egyptian mothers: A quasi-experimental study of a health | International Journal of Gynecology and                                |
| K. Ballard, Z. Belete, H. Kinfu, M. Tadesse, M. Amin and H. Atnafu                                                                                                                                                                                                                                                             | 2016 | The effect of prenatal and intrapartum care on the stillbirth                                                                                                 | PLoS ONE<br>International Journal of Gynecology and                    |
| T. Kefyalew, Z. Kebede, D. Getachew, D. Mukanga, T. Awano, A. Tekalegne, E. Batisso, W. Edossa, E. Mekonnen, J.                                                                                                                                                                                                                | 2016 | Health worker and policy-maker perspectives on use of intramuscular artesunate for pre-referral and definitive treatment of severe                            | Malaria Journal                                                        |
| S. S. Kim, D. Ali, A. Kennedy, R. Tesfaye, A. W. Tadesse, T. H. Abrha, R. Rawat and P. Menon                                                                                                                                                                                                                                   | 2015 | Ethiopia identifies delivery Effects of the integrated community case management of childhood                                                                 | BMC Public Health<br>American Journal of Tropical Medicine and Hygiene |
| A. Amouzou, E. Hazel, B. Shaw, N. P. Miller, M. Tafesse, Y. Mekonnen, L. H. Moulton, J.                                                                                                                                                                                                                                        | 2016 | illness strategy on child mortality in Obstacles to implementation of an intervention to improve surgical                                                     | BMC Health Services Research                                           |
| E. L. Aveling, D. T. Zegeye and M. Silverman                                                                                                                                                                                                                                                                                   | 2016 | services in an Ethiopian hospital: A Implementation of a national school-based Human Papillomavirus (HPV)                                                     | BMC Public Health                                                      |
| S. F. La Vincente, D. Mielnik, K. Jenkins, F. Bingwor, L. Volavola, H. Marshall, P. Druavesi, F. M. D. N. Adjei, C. Agyemang, J. B. Dasah, P. Kuranchie and A. G. B.                                                                                                                                                           | 2015 | vaccine campaign in Fiji: The effect of electronic reminders on risk management among diabetic                                                                | Journal of Diabetes and its Complications                              |
| K. Daniels, D. Sanders, E. Daviaud and T. Doherty                                                                                                                                                                                                                                                                              | 2015 | Valuing and sustaining (or not) the ability of volunteer community health workers to deliver integrated                                                       | PLoS ONE                                                               |
| K. P. Adams, T. J. Lybbert, S. A. Vosti and E. Ayifah                                                                                                                                                                                                                                                                          | 2016 | Using an economic experiment to estimate willingness-to-pay for a                                                                                             | Agricultural Economics (United Kingdom)                                |
| A. A. Adjei, P. Winch, A. Laar, D. J. Sullivan, Jr., K. S. Sakyi, J. K. Stephens, G. O. Adjei, I. A. Boateng, V. N. A. Aubyn, C. Kubio, J. Tuakli, L. Vanotoo, B. B. Bortei, M. Amo-Addae, F. Sorvor, N. Coleman, S. Dalglish, R. I. A. Agyepong, D. N. Y. Abankwah, A. Abroso, C. Chun, J. N. O. Dodoo, S. Lee, S. A. Mensah, | 2016 | Insights into the Affordable Medicines Facility-malaria in Ghana: The role of caregivers and licensed chemical sellers in four regions                        | Malaria Journal                                                        |
|                                                                                                                                                                                                                                                                                                                                | 2016 | The "universal" in UHC and Ghana's National Health Insurance Scheme: Policy and implementation                                                                | BMC Health Services Research                                           |
| B. Amoah, E. A. Anto, P. K. Osei, K. Pieterse and A. Crimi                                                                                                                                                                                                                                                                     | 2016 | Boosting antenatal care attendance and number of hospital deliveries among pregnant women in rural communities: A community                                   | BMC Pregnancy and Childbirth                                           |

|                                                                                                                                                                                                                                                                                                                                                                                                                                              |                                              |                                                                                                                                                                                                                                                                                                                                                                                                                                                                                                                                                                                                                                                                                                                                                                                                                                                                                                                                                                                                                                                                                                                                                                                                                                                                                                                                                                                                                                                                                                                                                                                                                                                                   |                                                                                                                                                                                                                                                                                                                                                                                                                                                                          |
|----------------------------------------------------------------------------------------------------------------------------------------------------------------------------------------------------------------------------------------------------------------------------------------------------------------------------------------------------------------------------------------------------------------------------------------------|----------------------------------------------|-------------------------------------------------------------------------------------------------------------------------------------------------------------------------------------------------------------------------------------------------------------------------------------------------------------------------------------------------------------------------------------------------------------------------------------------------------------------------------------------------------------------------------------------------------------------------------------------------------------------------------------------------------------------------------------------------------------------------------------------------------------------------------------------------------------------------------------------------------------------------------------------------------------------------------------------------------------------------------------------------------------------------------------------------------------------------------------------------------------------------------------------------------------------------------------------------------------------------------------------------------------------------------------------------------------------------------------------------------------------------------------------------------------------------------------------------------------------------------------------------------------------------------------------------------------------------------------------------------------------------------------------------------------------|--------------------------------------------------------------------------------------------------------------------------------------------------------------------------------------------------------------------------------------------------------------------------------------------------------------------------------------------------------------------------------------------------------------------------------------------------------------------------|
| G. D. Antwi, L. A. Bates, R. King,<br>P. R. Mahama, H. Tagbor, M.<br>Cairns and J. N. Newell<br>N. Y. Boadu, J. Amuasi, D.<br>Ansong, E. Einsiedel, D. Menon<br><br>A. Fusheini                                                                                                                                                                                                                                                              | 2016<br>2016<br>2016                         | Facilitators and barriers to uptake of<br>an extended seasonal malaria<br>chemoprevention programme in<br>Challenges with implementing<br>malaria rapid diagnostic tests at<br>The politico-economic challenges of<br>ghana's national health insurance<br>The value of building health<br>promotion capacities within<br>communities: Evidence from a<br>Effects of community health<br>interventions on under-5 mortality<br>in rural Guinea-Bissau (EPICS): A<br>Social network targeting to<br>maximise population behaviour<br>Expanding availability of safe<br>abortion services through private<br>sector accreditation: A case study of<br>Direct observation (DO) for drug-<br>resistant tuberculosis: Do we really<br>Acceptability of HIV Pre-Exposure<br>Prophylaxis (PrEP) and<br>Implementation Challenges among<br>Assessment of 'Accredited Social<br>Health Activists'-A national<br>Processes evaluation of coverage<br>and compliance to a round of mass<br>drug administration with DEC and<br>Learning before leaping: Integration<br>of an adaptive study design process<br>prior to initiation of BetterBirth, a<br>ls scale-up of community<br>mobilisation among sex workers<br>really possible in complex urban<br>Ambulance service associated with<br>reduced probabilities of neonatal<br>Effectiveness of onsite nurse<br>mentoring in improving quality of<br>institutional births in the primary<br>health centres of high priority<br>Effectiveness of introducing home-<br>based newborn care (HBNC) voucher<br>Adoption and implementation of<br>tobacco control policies in schools<br>in India: Results of the Bihar school | PLoS ONE<br>Malaria Journal<br>International Journal of<br>Health Policy and<br>Health Policy and<br>Planning<br>The Lancet Global Health<br>The Lancet<br>Reproductive Health<br>PLoS ONE<br>AIDS Patient Care and<br>STDs<br>Journal of Health,<br>Population and Nutrition<br>Tropical Biomedicine<br>Implementation Science<br>PLoS ONE<br>Health Affairs<br>PLoS ONE<br>Clinical Epidemiology and<br>Global Health<br>Asian Pacific Journal of<br>Cancer Prevention |
| E. Brazier, R. Fiorentino, M. S.<br>Barry and M. Diallo<br>P. Boone, D. Elbourne, I. Fazio,<br>S. Fernandes, C. Frost, C. Jayanty,<br>R. King, V. Mann, G. Piaggio, A.<br>D. A. Kim, A. R. Hwang, D.<br>Stafford, D. A. Hughes, A. J.                                                                                                                                                                                                        | 2015<br>2016<br>2015                         |                                                                                                                                                                                                                                                                                                                                                                                                                                                                                                                                                                                                                                                                                                                                                                                                                                                                                                                                                                                                                                                                                                                                                                                                                                                                                                                                                                                                                                                                                                                                                                                                                                                                   |                                                                                                                                                                                                                                                                                                                                                                                                                                                                          |
| S. K. Banerjee, K. L. Andersen, D.<br>Navin and G. Mathias<br>S. Benbaba, P. Isaakidis, M. Das,<br>S. Jadhav, T. Reid and J. Furin<br>V. Chakrapani, P. A. Newman, M.<br>Shunmugam, S. Mengle, J.<br>Varghese, R. Nelson and S. Bharat<br>F. N. Fathima, M. Raju, K. S.<br>Varadharajan, A. Krishnamurthy,                                                                                                                                   | 2015<br>2015<br>2015<br>2015<br>2015<br>2015 |                                                                                                                                                                                                                                                                                                                                                                                                                                                                                                                                                                                                                                                                                                                                                                                                                                                                                                                                                                                                                                                                                                                                                                                                                                                                                                                                                                                                                                                                                                                                                                                                                                                                   |                                                                                                                                                                                                                                                                                                                                                                                                                                                                          |
| S. Gunasekaran, Z. Kalimuthu, S.<br>Rajalakshmi and J. R. Jaipratha<br>L. R. Hirschhorn, K. Semrau, B.<br>Kodkany, R. Churchill, A. Kapoor,<br>J. Spector, S. Ringer, R. Firestone,                                                                                                                                                                                                                                                          | 2015<br>2015                                 |                                                                                                                                                                                                                                                                                                                                                                                                                                                                                                                                                                                                                                                                                                                                                                                                                                                                                                                                                                                                                                                                                                                                                                                                                                                                                                                                                                                                                                                                                                                                                                                                                                                                   |                                                                                                                                                                                                                                                                                                                                                                                                                                                                          |
| A. Kongelf, S. V. S. Bandewar, S.<br>Bharat and M. Collumbien<br>K. S. Babiarz, S. V. Mahadevan, N.<br>Divi and G. Miller<br>K. Jayanna, J. Bradley, P. Mony,<br>T. Cunningham, M. Washington,<br>S. Bhat, S. Rao, A. Thomas, S.<br>Rajaram, A. Kar, N. Swaroop, M.<br>T. G. Mahanta, S. Islam, A. K.<br>Sudke, V. Kumari, P. Gogoi, T.<br>N. Mathur, M. S. Pednekar, G. S.<br>Sorensen, E. M. Nagler, A. M.<br>Stoddard, H. A. Lando, M. B. | 2015<br>2016<br>2016<br>2016<br>2016<br>2016 |                                                                                                                                                                                                                                                                                                                                                                                                                                                                                                                                                                                                                                                                                                                                                                                                                                                                                                                                                                                                                                                                                                                                                                                                                                                                                                                                                                                                                                                                                                                                                                                                                                                                   |                                                                                                                                                                                                                                                                                                                                                                                                                                                                          |

|                                                                                                                                                                                                                                                                   |      |                                                                                                                                                                                                                                                          |                                                                                          |
|-------------------------------------------------------------------------------------------------------------------------------------------------------------------------------------------------------------------------------------------------------------------|------|----------------------------------------------------------------------------------------------------------------------------------------------------------------------------------------------------------------------------------------------------------|------------------------------------------------------------------------------------------|
| S. Ozawa, S. Singh, K. Singh, V. Chhabra and S. Bennett                                                                                                                                                                                                           | 2016 | The Avahan transition: Effects of transition readiness on program                                                                                                                                                                                        | PLoS ONE                                                                                 |
| S. Raghavan, S. Geller, S. Miller, S. S. Goudar, H. Anger, M. C. Yadavannavar, R. Dabash, S. R. Bidri, M. R. Gudadinni, R. Udgiri, P. Tripathy, N. Nair, R. Sinha, S. Rath, R. K. Gope, S. Rath, S. S. Roy, A. Bajpai, V. Singh, V. Nath, S. Ali, A. K. Kundu, D. | 2016 | Misoprostol for primary versus secondary prevention of postpartum haemorrhage: A cluster-randomised non-inferiority Effect of participatory women's groups facilitated by Accredited Social Health Activists on birth outcomes in rural eastern India: A | BJOG: An International Journal of Obstetrics and Gynaecology<br>The Lancet Global Health |
| D. Kusuma, J. Cohen, M. McConnell and P. Berman                                                                                                                                                                                                                   | 2016 | Can cash transfers improve determinants of maternal mortality? Evidence from the Teaching attachment behaviors to pregnant women: A randomized                                                                                                           | Social Science and Medicine                                                              |
| M. Akbarzadeh, A. Dokuhaki, A. Joker, N. Pishva and N. Zare                                                                                                                                                                                                       | 2016 | controlled trial of effects on infant                                                                                                                                                                                                                    | Annals of Saudi Medicine                                                                 |
| M. Al Abdullah and A. A. Al Bakri                                                                                                                                                                                                                                 | 2016 | Electronic health record system: Adoption and influencing factors                                                                                                                                                                                        | International Journal of Entrepreneurship and Innovation Management                      |
| T. Abuya, C. Ndwiga, J. Ritter, L. Kanya, B. Bellows, N. Binkin and                                                                                                                                                                                               | 2015 | The effect of a multi-component intervention on disrespect and Strengthening health system                                                                                                                                                               | BMC Pregnancy and Childbirth                                                             |
| M. Atela, P. Bakibinga, R. Ettarh, C. Kyobutungi and S. Cohn                                                                                                                                                                                                      | 2015 | governance using health facility service charters: A mixed methods                                                                                                                                                                                       | BMC Health Services Research                                                             |
| G. Christensen, H. N. Dentz, A. J. Pickering, T. Bourdier, B. F. Arnold, J. M. Colford, Jr. and C. S. Githinji, C. Jones, J. Malinga, R. W. Snow, A. Talisuna and D. Zurovac                                                                                      | 2015 | Pilot cluster randomized controlled trials to evaluate adoption of water, sanitation, and hygiene                                                                                                                                                        | American Journal of Tropical Medicine and Hygiene                                        |
| Y. Kawakatsu, J. Tanaka, K. Ogawa, K. Ogendo and S. Honda                                                                                                                                                                                                         | 2015 | Development of a text-messaging intervention to improve treatment adherence and post-treatment                                                                                                                                                           | Malaria Journal                                                                          |
| A. Opwora, E. Waweru, M. Toda, A. Noor, T. Edwards, G. Fegan, S. Molyneux and C. Goodman                                                                                                                                                                          | 2015 | Effects of three interventions and determinants of full vaccination                                                                                                                                                                                      | Public Health                                                                            |
| D. O. Soti, S. N. Kinoti, A. H. Omar, J. Logedi, T. K. Mwendwa, Z. Hirji and S. Ferro                                                                                                                                                                             | 2015 | Implementation of patient charges at primary care facilities in Kenya: Implications of low adherence to                                                                                                                                                  | Health Policy and Planning                                                               |
| R. Vedanthan, E. Blank, N. Tuikong, J. Kamano, L. Misoi, D. Tulienge, C. Hutchinson, D. D.                                                                                                                                                                        | 2015 | Feasibility of an innovative electronic mobile system to assist health workers to collect accurate, Usability and feasibility of a tablet-based decision-support and integrated Record-keeping (DESIRE)                                                  | Malaria Journal<br>International Journal of Medical Informatics                          |
| H. Vermandere, V. Naanyu, O. Degomme and K. Michiels                                                                                                                                                                                                              | 2015 | Implementation of an HPV vaccination program in Eldoret, Kenya: Results from a qualitative                                                                                                                                                               | BMC Public Health                                                                        |



|                                                                                                                                                                                                                                                                                                                                                                                                                                                                                                 |      |                                                                                                                                                                                                                                       |                                                                                       |
|-------------------------------------------------------------------------------------------------------------------------------------------------------------------------------------------------------------------------------------------------------------------------------------------------------------------------------------------------------------------------------------------------------------------------------------------------------------------------------------------------|------|---------------------------------------------------------------------------------------------------------------------------------------------------------------------------------------------------------------------------------------|---------------------------------------------------------------------------------------|
| S. Washington, K. Owuor, J. M. Turan, R. L. Steinfeld, M. Onono, S. B. Shade, E. A. Bukusi, M. L. Ackers and C. R. Cohen                                                                                                                                                                                                                                                                                                                                                                        | 2015 | Implementation and Operational Research: Effect of Integration of HIV Care and Treatment into Antenatal Care Clinics on Mother-to-Child HIV                                                                                           | Journal of Acquired Immune Deficiency Syndromes                                       |
| K. T. Alexander, A. Mwaki, D. Adhiambo, M. Cheney-Coker, R. E. Waweru, C. Goodman, S. Kedenge, B. Tsofa and S. Molyneux                                                                                                                                                                                                                                                                                                                                                                         | 2016 | The life-cycle costs of school water, sanitation and hygiene access in Tracking implementation and (un)intended consequences: A process evaluation of an innovative                                                                   | International Journal of Environmental Research Health Policy and Planning            |
| M. Alameddine, S. Saleh and N. Natafji                                                                                                                                                                                                                                                                                                                                                                                                                                                          | 2015 | Assessing health-care providers' readiness for reporting quality and patient safety indicators at primary                                                                                                                             | Human Resources for Health                                                            |
| C. M. Cooper, R. Fields, C. I. Mazzeo, N. Taylor, A. Pfitzer, M. A. Amouzou, M. Kanyuka, E. Hazel, R. Heidkamp, A. Marsh, T. Mleme, S. Munthali, L. Park, B. Banda, L. H. Moulton, R. E. Black, R. Heidkamp, E. Hazel, H. Nsona, T. Mleme, A. Jamali and J. Bryce                                                                                                                                                                                                                               | 2015 | Successful proof of concept of family planning and immunization Independent evaluation of the integrated community case management of childhood illness                                                                               | Global health, science and practice American Journal of Tropical Medicine and Hygiene |
| M. E. Herce, T. Mtande, F. Chimbwandira, I. Mofolo, C. K. Chingondole, N. E. Rosenberg, K. E. Lancaster, E. Kamanga, J. Chinkonde, W. Kumwenda, G. M. H. Kim, S. Ahmed, M. C. Hosseinipour, T. P. Giordano, E. Y. Chiao, X. Yu, C. Nguyen, F. S. Ahmed, M. Schwarz, R. J. Flick, C. A. Rees, M. Harawa, K. Simon, J. A. Robison, P. N. Kazembe and D. Almond, M. Madanitsa, V. Mwapasa, L. Kalilani-Phiri, J. K. Dovel, S. Yeatman, J. J. Van Oosterhout, A. Chan, A. Mantengeni, M. Landes, R. | 2015 | Measuring implementation strength for integrated community case Supporting Option B+ scale up and strengthening the prevention of mother-to-child transmission cascade in central Malawi: Results from a serial cross-sectional study | American Journal of Tropical Medicine and Hygiene BMC Infectious Diseases             |
|                                                                                                                                                                                                                                                                                                                                                                                                                                                                                                 | 2015 | Implementation and operational research: The impact of option B+ on the antenatal PMTCT cascade in                                                                                                                                    | Journal of Acquired Immune Deficiency Syndromes                                       |
|                                                                                                                                                                                                                                                                                                                                                                                                                                                                                                 | 2016 | Lost opportunities to identify and treat HIV-positive patients: Results from a baseline assessment of Provider and user acceptability of intermittent screening and                                                                   | Tropical Medicine and International Health Malaria Journal                            |
|                                                                                                                                                                                                                                                                                                                                                                                                                                                                                                 | 2016 | Trends in ART initiation among men and non-pregnant/non-breastfeeding women before and                                                                                                                                                | PLoS ONE                                                                              |
| N. Kalu, N. Lufesi, D. Havens and K. Mortimer                                                                                                                                                                                                                                                                                                                                                                                                                                                   | 2016 | Implementation of world health organization Integrated Management of Childhood Illnesses                                                                                                                                              | PLoS ONE                                                                              |
| A. Krishnan, S. E. Brown, M. A. Ghani, F. Khan, A. Kamarulzaman and F. L. Altice                                                                                                                                                                                                                                                                                                                                                                                                                | 2016 | Pretreatment drug use characteristics and experiences among patients in a voluntary                                                                                                                                                   | Substance Abuse                                                                       |
| M. P. Fort, S. Murillo, E. Lpez, A. L. Dengo, N. Alvarado-Molina, I. De Beausset, M. Castro, L.                                                                                                                                                                                                                                                                                                                                                                                                | 2015 | Impact evaluation of a healthy lifestyle intervention to reduce cardiovascular disease risk in health                                                                                                                                 | BMC Health Services Research                                                          |

|                                                                                                                                                                                                                                                                                                                                                                                                                                                                                                                                                                                                                                                           |      |                                                                                                                                            |                                                                      |
|-----------------------------------------------------------------------------------------------------------------------------------------------------------------------------------------------------------------------------------------------------------------------------------------------------------------------------------------------------------------------------------------------------------------------------------------------------------------------------------------------------------------------------------------------------------------------------------------------------------------------------------------------------------|------|--------------------------------------------------------------------------------------------------------------------------------------------|----------------------------------------------------------------------|
| L. A. Palinkas, C. V. Chavarin, C. M. Rafful, M. Y. Um, D. V. G. Nigenda, L. M. González-Robledo, C. Juárez-Ramírez and T. Adam                                                                                                                                                                                                                                                                                                                                                                                                                                                                                                                           | 2015 | Sustainability of evidence-based practices for HIV prevention among                                                                        | PLoS ONE                                                             |
| D. M. Walker, S. R. Cohen, J. Fritz, M. Olvera-García, S. T. Zelek, J. O. Fahey, M. Romero-O. Chimeddamba, A. Peeters, D. Ayton, E. Tumenjargal, S. Sodov and C. Joyce                                                                                                                                                                                                                                                                                                                                                                                                                                                                                    | 2016 | Understanding the dynamics of the Seguro Popular de Salud policy implementation in Mexico from a                                           | Implementation Science                                               |
| C. Boukhalfa, S. Abouchadi, N. Cunden and S. Witter                                                                                                                                                                                                                                                                                                                                                                                                                                                                                                                                                                                                       | 2016 | Impact evaluation of PRONTO Mexico: A simulation-based                                                                                     | Simulation in Healthcare                                             |
| A. Biza, I. Jille-Traas, M. Colomar, M. Belizan, J. Requejo Harris, B. Crahay, M. Merialdi, M. H. Nguyen, F. Althabe, A. Aleman, E. Bergel, A. Carbonell, L. Chavane, T. Delvaux, D. Geelhoed, M. J. F. Cowan, M. Micek, J. F. G. Cowan, M. Napúa, R. Hoek, S. Gimbel, S. Gloyd, K. Sherr, J. T. B. I. Avan, D. Berhanu, N. Umar, D. Wickremasinghe and J. Schellenberg                                                                                                                                                                                                                                                                                   | 2015 | program in obstetric and neonatal Implementation of clinical guidelines on diabetes and hypertension in urban Mongolia: A                  | Implementation Science                                               |
| P. Menon, P. H. Nguyen, K. K. Saha, A. Khaled, A. Kennedy, L. M. Tran, T. Sanghvi, N. Hajeebhoy, J. Baker, S. Alayon, K. E. V. Langlois, V. B. Montekio, T. Young, K. Song, J. Alcalde-M. E. Kruk, D. Vail, K. Austin-Evelyn, L. Atuyambe, D. Greeson, K. A. Grépin, S. P. S. Kibira, M. M. J. Nkhata, M. Muzambi, D. Ford, A. K. Chan, G. Abongomera, H. Namata, I. Mambule, A. South, P. Revill, C. Grundy, T. Mabugu, L. Chiwaula, J. Hakim, C. Kityo, A. Reid, E. Katabira, S. Sodhi, C. F. Gilks, D. M. Gibb, J. Seeley, F. Cataldo, F. Cataldo, A. K. Chan, L. Chiwaula, M. J. Nkhata, F. Mirimo, S. Kiwuwa, J. Seeley, G. Abongomera, C. Kityo, H. | 2016 | The free delivery and caesarean policy in Morocco: how much do                                                                             | Implementation Science<br>Tropical Medicine and International Health |
|                                                                                                                                                                                                                                                                                                                                                                                                                                                                                                                                                                                                                                                           | 2015 | Challenges and opportunities for implementing evidence-based antenatal care in Mozambique: A                                               | BMC Pregnancy and Childbirth                                         |
|                                                                                                                                                                                                                                                                                                                                                                                                                                                                                                                                                                                                                                                           | 2015 | qualitative study Early ART initiation among HIV-positive pregnant women in central Mozambique: A stepped wedge                            | Implementation Science                                               |
|                                                                                                                                                                                                                                                                                                                                                                                                                                                                                                                                                                                                                                                           | 2016 | District decision-making for health in low-income settings: A feasibility study of a data-informed platform                                | Health Policy and Planning                                           |
|                                                                                                                                                                                                                                                                                                                                                                                                                                                                                                                                                                                                                                                           | 2016 | Impacts on Breastfeeding Practices of At-Scale Strategies That Combine Intensive Interpersonal Counseling, Mass Media, and Community       | PLoS Medicine                                                        |
|                                                                                                                                                                                                                                                                                                                                                                                                                                                                                                                                                                                                                                                           | 2016 | Enhancing evidence informed policymaking in complex health                                                                                 | Health Research Policy and Systems                                   |
|                                                                                                                                                                                                                                                                                                                                                                                                                                                                                                                                                                                                                                                           | 2016 | Evaluation of a maternal health program in Uganda and Zambia finds mixed results on quality of care and                                    | Health Affairs                                                       |
|                                                                                                                                                                                                                                                                                                                                                                                                                                                                                                                                                                                                                                                           | 2016 | Shifting human resources for health in the context of ART provision: Qualitative and quantitative findings from the Lablite baseline study | BMC Health Services Research                                         |

|                                                                                                                                                                                                                                                                                                                                                                                                                                                                                                                                                                                                                                                                                                                                                                                                                                                                                                                                                                                                                                                                                                                                                                                                                                                                        |                                                                                                                                                                                                                                                                                                                                                                                                                                                                                                                                                                                                                                                                                                                                                                                                                                                                                                                                                                                                                                                                                                                                                                                                                                                                                                                                                                                                                                                   |                                                                                                                                                                                                                                                                                                                                                                                                                         |
|------------------------------------------------------------------------------------------------------------------------------------------------------------------------------------------------------------------------------------------------------------------------------------------------------------------------------------------------------------------------------------------------------------------------------------------------------------------------------------------------------------------------------------------------------------------------------------------------------------------------------------------------------------------------------------------------------------------------------------------------------------------------------------------------------------------------------------------------------------------------------------------------------------------------------------------------------------------------------------------------------------------------------------------------------------------------------------------------------------------------------------------------------------------------------------------------------------------------------------------------------------------------|---------------------------------------------------------------------------------------------------------------------------------------------------------------------------------------------------------------------------------------------------------------------------------------------------------------------------------------------------------------------------------------------------------------------------------------------------------------------------------------------------------------------------------------------------------------------------------------------------------------------------------------------------------------------------------------------------------------------------------------------------------------------------------------------------------------------------------------------------------------------------------------------------------------------------------------------------------------------------------------------------------------------------------------------------------------------------------------------------------------------------------------------------------------------------------------------------------------------------------------------------------------------------------------------------------------------------------------------------------------------------------------------------------------------------------------------------|-------------------------------------------------------------------------------------------------------------------------------------------------------------------------------------------------------------------------------------------------------------------------------------------------------------------------------------------------------------------------------------------------------------------------|
| <p>A. S. Rustagi, S. Gimbel, R. Nduati, M. D. F. Cuembelo, J. N. Wasserheit, C. Farquhar, S. Gloyd, K. Sherr, C. Henley, A. Koné, J. Robinson, S. A. Granato, K. Jordan, E. Butrick, G. Yamey and S. Miller</p> <p>K. Theiss-Nyland, W. Ejersa, C. Karema, D. Koné, H. Koenker, Y. A. R. Khowaja, R. N. Qureshi, D. Sawchuck, O. T. Oladapo, O. O. Adetoro, E. A. Orenuga, M. Bellad, A. Mallapur, U. A. M. Bergh, J. De Graft-Johnson, N. Khadka, A. Om'Iniabo, R. Udani, H. Pratomo and S. De</p> <p>D. Singh, J. Negin, M. Otim, C. G. Orach and R. Cumming</p> <p>P. C. Chi, P. Bulage, H. Urdal and J. Sundby</p> <p>C. Wilunda, G. Putoto, D. D. Riva, F. Manenti, A. Atzori, F. Calia, T. Assefa, B. Turri, O. U. Baker, M. Okuga, P. Waiswa, F. Manzi, S. Peterson and C. Hanson</p> <p>M. K. Charles, M. L. Lindegren, C. W. Wester, M. Blevins, T. R. Sterling, N. T. Dung, J. C. Dusingize, D. Avit-Edi, N. Durier, S. Abrahams-Gessel, C. A. Denman, C. M. Montano, T. A. Gaziano, N. Levitt, A. Rivera-L. B. Brown, D. V. Havlir, J. Ayieko, F. Mwangwa, A. Owaraganise, D. Kwarisiima, V. Jain, T. Ruel, T. Clark, G. Chamie, B. Acharya, J. Tenpa, P. Thapa, B. Gauchan, D. Citrin and M. H. Else, S. Khanal, S. Manandhar, D. Sah, S. C. Baral, K.</p> | <p>Implementation and Operational Research: Impact of a Systems Engineering Intervention on PMTCT Service Delivery in Côte d'Ivoire, Kenya, Mozambique: A Cluster Barriers and facilitators to scaling up the non-pneumatic anti-shock Operational challenges to continuous LLIN distribution: A The feasibility of community level interventions for pre-eclampsia in South Asia and Sub-Saharan Africa: A mixed-methods design</p> <p>The three waves in implementation of facility-based kangaroo mother care: A multi-country case study</p> <p>The effect of payment and incentives on motivation and focus of community health workers: Five Barriers in the delivery of emergency obstetric and neonatal care in post-conflict Africa: Qualitative case Assessing coverage, equity and quality gaps in maternal and neonatal care in sub-Saharan Africa: Bottlenecks in the implementation of essential screening tests in antenatal care: Syphilis, HIV, and Implementation of Tuberculosis Intensive Case Finding, Isoniazid Preventive Therapy, and Infection Control ("Three I's") and The training and fieldwork experiences of community health workers conducting population-</p> <p>High levels of retention in care with streamlined care and universal test and treat in East Africa</p> <p>Recommendations from primary care providers for integrating Understanding implementation and feasibility of tobacco cessation in</p> | <p>Journal of Acquired Immune Deficiency Syndromes</p> <p>PLoS ONE</p> <p>Malaria Journal</p> <p>Reproductive Health</p> <p>BMC International Health and Human Rights</p> <p>Human Resources for Health</p> <p>PLoS ONE</p> <p>PLoS ONE</p> <p>International Journal of Gynecology and Obstetrics</p> <p>PLoS ONE</p> <p>Global Heart</p> <p>AIDS</p> <p>BMC Health Services Research</p> <p>Implementation Science</p> |
|------------------------------------------------------------------------------------------------------------------------------------------------------------------------------------------------------------------------------------------------------------------------------------------------------------------------------------------------------------------------------------------------------------------------------------------------------------------------------------------------------------------------------------------------------------------------------------------------------------------------------------------------------------------------------------------------------------------------------------------------------------------------------------------------------------------------------------------------------------------------------------------------------------------------------------------------------------------------------------------------------------------------------------------------------------------------------------------------------------------------------------------------------------------------------------------------------------------------------------------------------------------------|---------------------------------------------------------------------------------------------------------------------------------------------------------------------------------------------------------------------------------------------------------------------------------------------------------------------------------------------------------------------------------------------------------------------------------------------------------------------------------------------------------------------------------------------------------------------------------------------------------------------------------------------------------------------------------------------------------------------------------------------------------------------------------------------------------------------------------------------------------------------------------------------------------------------------------------------------------------------------------------------------------------------------------------------------------------------------------------------------------------------------------------------------------------------------------------------------------------------------------------------------------------------------------------------------------------------------------------------------------------------------------------------------------------------------------------------------|-------------------------------------------------------------------------------------------------------------------------------------------------------------------------------------------------------------------------------------------------------------------------------------------------------------------------------------------------------------------------------------------------------------------------|

|                                                                                                                                                                                                                                                                                |      |                                                                                                                                      |                                                   |
|--------------------------------------------------------------------------------------------------------------------------------------------------------------------------------------------------------------------------------------------------------------------------------|------|--------------------------------------------------------------------------------------------------------------------------------------|---------------------------------------------------|
| K. Thapa, H. Sanghvi, B. Rawlins, Y. B. Karki, K. Regmi, S. Aryal, Y. Aryal, P. Murakami, J. Bhattarai and S. Suhowatsky                                                                                                                                                       | 2016 | Coverage, compliance, acceptability and feasibility of a program to prevent pre-eclampsia and eclampsia through calcium              | BMC Pregnancy and Childbirth                      |
| K. Yoshioka, J. Nakamura, B. Pérez, D. Tercero, L. Pérez and Y. Tabaru                                                                                                                                                                                                         | 2015 | Effectiveness of large-scale chagas disease vector control program in Nicaragua by residual insecticide                              | American Journal of Tropical Medicine and Hygiene |
| C. J. Uneke, C. D. Ndukwe, A. A. Ezeoha, H. C. Uro-Chukwu and C.                                                                                                                                                                                                               | 2015 | Implementation of a health policy advisory committee as a knowledge                                                                  | International Journal of Health Policy and        |
|                                                                                                                                                                                                                                                                                |      | Changes in men's knowledge & attitudes following health                                                                              |                                                   |
| O. A. Adeleye and C. A. Okonkwo                                                                                                                                                                                                                                                | 2016 | education on their role in                                                                                                           | Social Medicine                                   |
| O. Adesoro, C. Shumba, J. Kpamor, J. Achan, H. Kivumbi, J. Dada, K. Maxwell, J. Tibenderana, M. Marasciulo, P. O. F. Bamiselu, I. Ajayi, O. Fawole, D. Dairo, O. Ajumobi, A.                                                                                                   | 2016 | Health worker perspectives on the possible use of intramuscular artesunate for the treatment of severe malaria at lower-level health | BMC Health Services Research                      |
|                                                                                                                                                                                                                                                                                | 2016 | Adherence to malaria diagnosis and treatment guidelines among                                                                        | BMC Public Health                                 |
|                                                                                                                                                                                                                                                                                | 2016 | Determinants of early initiation of breastfeeding in Nigeria: A population-based study using the                                     | BMC Pregnancy and Childbirth                      |
| A. S. Berde and S. S. Yalcin                                                                                                                                                                                                                                                   | 2016 | User experience with a health                                                                                                        |                                                   |
| S. Mohammed, B. Aji, J. L. Bermejo, A. Souares, H. Dong and R. Sauerborn                                                                                                                                                                                                       | 2016 | insurance coverage and benefit-package access: Implications for Barefoot therapists: Barriers and                                    | Health Policy and Planning                        |
| N. Atif, K. Lovell, N. Husain, S. Sikander, V. Patel and A. Rahman                                                                                                                                                                                                             | 2016 | facilitators to delivering maternal mental health care through peer                                                                  | International Journal of Mental Health Systems    |
| C. E. Beaudoin, H. Chen and S. Agha                                                                                                                                                                                                                                            | 2016 | Estimating Causal Effects with Propensity Score Models: An                                                                           | Journal of Health Communication                   |
| T. Wingfield, D. Boccia, M. A. Tovar, D. Huff, R. Montoya, J. J. Lewis, R. H. Gilman and C. A. J. Arbiol, M. Yabe, H. Nomura, M. Borja, N. Gloriani and S. I. H. N. Gouda, A. Hodge, R. Bermejo, III, W. Zeck and E. M. P. Skiles, S. L. Curtis, P. Basinga, G. Angeles and H. | 2015 | Designing and implementing a socioeconomic intervention to enhance TB control: Operational                                           | BMC Public Health                                 |
|                                                                                                                                                                                                                                                                                | 2015 | Using discrete choice modeling to evaluate the preferences and                                                                       | Human Vaccines and Immunotherapeutics             |
|                                                                                                                                                                                                                                                                                | 2016 | The impact of healthcare insurance on the utilisation of facility-based                                                              | PLoS ONE                                          |
|                                                                                                                                                                                                                                                                                | 2015 | The effect of performance-based financing on illness, care-seeking                                                                   | BMC Health Services Research                      |
|                                                                                                                                                                                                                                                                                | 2015 | Evaluating the effect of a proposed logistics fee cap on pharmaceuticals                                                             | BMC Health Services Research                      |
| V. Bangalee and F. Suleman                                                                                                                                                                                                                                                     | 2015 | Implementation of couples' voluntary HIV counseling and                                                                              |                                                   |
| W. Kilembe, K. M. Wall, M. Mokgoro, A. Mwaanga, E. Dissen, M. Kamusoko, H. Phiri, J.                                                                                                                                                                                           | 2015 | testing services in Durban, South                                                                                                    | BMC Public Health                                 |

|                                                                                                                                                                       |      |                                                                                                                                                                                                          |                                                           |
|-----------------------------------------------------------------------------------------------------------------------------------------------------------------------|------|----------------------------------------------------------------------------------------------------------------------------------------------------------------------------------------------------------|-----------------------------------------------------------|
| N. Leon, R. Surender, K. Bobrow, J. Muller and A. Farmer                                                                                                              | 2015 | Improving treatment adherence for blood pressure lowering via mobile phone SMS-messages in South Africa: A qualitative evaluation of                                                                     | BMC Family Practice                                       |
| N. Malangu and M. Mngomezulu<br>H. Myburgh, J. P. Murphy, M. Van Huyssteen, N. Foster, C. J. Grobbelaar, H. E. Struthers, J. A. I. Eloff, M. Finestone and B. Forsyth | 2015 | Evaluation of tuberculosis infection control measures implemented at primary health care facilities in Implementation of an electronic monitoring and evaluation system for the antiretroviral treatment | BMC Infectious Diseases                                   |
| S. R. Schwartz, N. West, R. Phofa, N. Yende, I. Sanne, J. Bassett and I. Edoaka, T. Ensor, B. McPake, R. Amara, F. M. Tseng and J. Edem-                              | 2015 | HIV/AIDS infected mothers' experience of a group intervention                                                                                                                                            | PLoS ONE                                                  |
| M. P. Bertone, M. Lagarde and S. Witter                                                                                                                               | 2016 | Acceptability and preferences for safer conception HIV prevention                                                                                                                                        | South African Journal of Education                        |
| S. Kanamori, S. Sow, M. C. Castro, R. Matsuno, A. Tsuru and                                                                                                           | 2016 | Free health care for under-fives, expectant and recent mothers? Performance-based financing in the context of the complex remuneration of health workers:                                                | International Journal of STD and AIDS                     |
| I. F. Adam, K. Nakamura, M. Kizuki, R. Al Rifai and U. Vanching                                                                                                       | 2015 | Implementation of 5S management method for lean healthcare at a                                                                                                                                          | Health Economics Review                                   |
| A. D. Ahmad, A. A. Elnour, M. A. E. Yousif, F. H. Farah, H. A. Akasha, A. Abasaeed, A. shehab,                                                                        | 2015 | Relationship between implementing interpersonal communication and mass education campaigns in Pharmacist's interventions to improve clinical outcomes in patients with type 2 diabetes                   | BMC Health Services Research                              |
| N. Al Kalbani, S. Al Nuaimim, A. K. Church, A. Wringe, S. Lewin, G. B. Ploubidis, P. Fakudze, I. Initiative and S. H. Mayhew                                          | 2015 | Exploring the feasibility of service integration in a low-income setting: A mixed methods investigation into                                                                                             | Global Health Action                                      |
| S. J. An, A. S. George, A. E. LeFevre, R. Mpembeni, I. Moshia, D. Mohan, A. Yang, J. Chebet, C.                                                                       | 2015 | Supply-side dimensions and dynamics of integrating HIV testing and counselling into routine                                                                                                              | BMJ Open                                                  |
| A. A. R. Arkamuhabwa and V. Manyanga                                                                                                                                  | 2015 | Challenges facing effective implementation of co-trimoxazole prophylaxis in children born to HIV-                                                                                                        | International Journal of Diabetes in Developing Countries |
| A. Kalolo, R. Radermacher, M. Stoermer, M. Meshack and M. De Allegri                                                                                                  | 2015 | Factors affecting adoption, implementation fidelity, and sustainability of the Redesigned Community Health Fund in                                                                                       | PLoS ONE                                                  |
| O. C. Tran, R. D. Bruce, F. Masao, O. Ubuguyu, N. Sabuni, J. E. Bazant, H. Mahler, M. Machaku, R. Lemwayi, Y. Kulindwa, J. G. Lija, B. Mpora, D.                      | 2015 | Implementation and operational research: Linkage to care among                                                                                                                                           | BMC Health Services Research                              |
| Kulindwa, J. G. Lija, B. Mpora, D.                                                                                                                                    | 2016 | A randomized evaluation of a demand creation lottery for voluntary medical male                                                                                                                          | Drug, Healthcare and Patient Safety                       |
| O. C. Tran, R. D. Bruce, F. Masao, O. Ubuguyu, N. Sabuni, J. E. Bazant, H. Mahler, M. Machaku, R. Lemwayi, Y. Kulindwa, J. G. Lija, B. Mpora, D.                      | 2015 | Implementation and operational research: Linkage to care among                                                                                                                                           | Global Health Action                                      |
| Kulindwa, J. G. Lija, B. Mpora, D.                                                                                                                                    | 2016 | A randomized evaluation of a demand creation lottery for voluntary medical male                                                                                                                          | Journal of Acquired Immune Deficiency Syndromes           |

|                                                                                                                                                                                                                                                                                                                                                               |      |                                                                                                                         |                                                 |
|---------------------------------------------------------------------------------------------------------------------------------------------------------------------------------------------------------------------------------------------------------------------------------------------------------------------------------------------------------------|------|-------------------------------------------------------------------------------------------------------------------------|-------------------------------------------------|
| R. Mooij, I. H. Mwampagatwa, J. van Dillen and J. Stekelenburg                                                                                                                                                                                                                                                                                                | 2016 | Antenatal corticosteroid therapy for foetal maturation in women with eclampsia and severe pre-eclampsia                 | BMC Pregnancy and Childbirth                    |
| J. Msovela and A. Tengia-Kessy                                                                                                                                                                                                                                                                                                                                | 2016 | Implementation and acceptability of strategies instituted for engaging                                                  | Reproductive Health                             |
| A. K. Mushi, J. J. Massaga, C. I. Mandara, G. M. Mubyazi, F. Francis, M. Kamugisha, J. Urassa, D. Watson-Jones, S. Lees, J. Mwangi, N. Neke, J. Changalucha, N. Broutet, I. T. Toothong, M. Tipayamongkhogul, N.                                                                                                                                              | 2016 | Acceptability of malaria rapid diagnostic tests administered by village health workers in Pangani                       | Malaria Journal                                 |
| Y. N. Alfonso, D. Bishai, J. Bua, A. Mutebi, C. Mayora and E. Ekirapa-Kiracho                                                                                                                                                                                                                                                                                 | 2016 | Feasibility and acceptability of delivering adolescent health interventions alongside HPV                               | Health Policy and Planning                      |
| L. Pac, M. M. Horwitz, A. M. Namutebi, B. J. Auerbach, A. Semeere, T. Namulema, M. D. Tuhebwe, J. Bagonza, E. E. Kiracho, A. Yeka, A. M. Elliott and P. Waiswa, G. Namazzi, K. Kerber and S. Peterson                                                                                                                                                         | 2015 | Evaluation of mass drug administration in the program to                                                                | BMC Public Health                               |
| P. Waiswa, G. Pariyo, K. Kallander, J. Akuze, G. Namazzi, E. Ekirapa-Kiracho, K. Kerber, H. Sengendo, P. Aliganyira, J. E. Lawn, S. Peterson, R. P. Wasswa, C. K. Nalwadda, E. Buregyeya, S. N. Gitta, P. Anguzu C. Agaro, J. Beyeza-Kashesya, P. Waiswa, J. N. Sekandi, S. Tusiime, S. E. Ahumuza, J. Rujumba, A. Nkoyooyo, R. Byaruhanga and R. K. Wanyenze | 2015 | Cost-effectiveness analysis of a voucher scheme combined with obstetrical quality improvements:                         | Health Policy and Planning                      |
|                                                                                                                                                                                                                                                                                                                                                               | 2015 | Implementation and operational research: Integrated pre-                                                                | Journal of Acquired Immune Deficiency Syndromes |
|                                                                                                                                                                                                                                                                                                                                                               | 2015 | antiretroviral therapy screening and Uptake of mass drug administration                                                 | PLoS ONE                                        |
|                                                                                                                                                                                                                                                                                                                                                               | 2015 | programme for schistosomiasis                                                                                           | Global Health Action                            |
|                                                                                                                                                                                                                                                                                                                                                               | 2015 | Designing for action: Adapting and implementing a community-based                                                       | Global Health Action                            |
|                                                                                                                                                                                                                                                                                                                                                               | 2015 | Effect of the Uganda Newborn Study on care-seeking and care practices: A cluster-randomised controlled trial            | Global Health Action                            |
|                                                                                                                                                                                                                                                                                                                                                               | 2015 | Implementation of infection control in health facilities in Arua district,                                              | BMC Infectious Diseases                         |
|                                                                                                                                                                                                                                                                                                                                                               | 2016 | The conduct of maternal and perinatal death reviews in Oyam                                                             | BMC Women's Health                              |
|                                                                                                                                                                                                                                                                                                                                                               | 2016 | Challenges encountered in providing integrated HIV, antenatal and postnatal care services: A case                       | Reproductive Health                             |
|                                                                                                                                                                                                                                                                                                                                                               | 2016 | Expanding HIV testing and counselling into communities: Feasibility, acceptability, and effects of an integrated family | Health Policy and Planning                      |
| A. Brunie, P. Wamala-Mucheri, A. Akol, S. Mercer and M. Chen                                                                                                                                                                                                                                                                                                  | 2016 | Challenges for the implementation of World Health Organization                                                          | Implementation Science                          |
| J. C. Kane, A. Adaku, J. Nakku, R. Odokonyero, J. Okello, S. Musisi, J. Augustinavicius, M. C. Greene, A. R. Semwanga, S. Nakubulwa and T. Adam                                                                                                                                                                                                               | 2016 | guidelines for acute stress, PTSD, Applying a system dynamics                                                           | Health Research Policy and Systems              |
|                                                                                                                                                                                                                                                                                                                                                               | 2016 | modelling approach to explore                                                                                           |                                                 |

|                                                                                                                                                                                                                                                                                                                                                                                                                                                                                                                                        |      |                                                                                                                                                                                                                                                                                                                                                                                                                                      |                                                                                                                                                                 |
|----------------------------------------------------------------------------------------------------------------------------------------------------------------------------------------------------------------------------------------------------------------------------------------------------------------------------------------------------------------------------------------------------------------------------------------------------------------------------------------------------------------------------------------|------|--------------------------------------------------------------------------------------------------------------------------------------------------------------------------------------------------------------------------------------------------------------------------------------------------------------------------------------------------------------------------------------------------------------------------------------|-----------------------------------------------------------------------------------------------------------------------------------------------------------------|
| E. Ssemmondo, F. Mwangwa, J. L. Kironde, D. Kwarisiima, T. D. Clark, C. Marquez, E. D. M. J. Bojko, A. Mazhnaya, I. Makarenko, R. Marcus, S. F. Althabe, A. Alemán, M. Berrueta, P. Morello, L. Gibbons, M. Colomar, V. T. Tong, P. M. Dietz, S. L. Farr, A. Ciganda, A. D. T. M. An, N. Kibria, N. V. Huy, P. T. Hai and F. Stillman                                                                                                                                                                                                  | 2016 | Implementation and Operational Research: Population-Based Active Tuberculosis Case Finding during bureaucracy & Beliefs: Assessing the barriers to accessing opioid                                                                                                                                                                                                                                                                  | Journal of Acquired Immune Deficiency Syndromes<br>Drugs: Education, Prevention and Policy                                                                      |
| D. Shelley, N. VanDevanter, C. C. Cleland, L. Nguyen and N. É. M. Ansbro, M. M. Gill, J. Reynolds, K. D. Shelley, S. Strasser, T. Sripipatana, A. T. Ncube, G. T. Mumba, F. Terris-C. Bulaya, K. E. Mwape, C. Michelo, C. S. Sikasunge, C. K. D. Shelley, É. M. Ansbro, A. T. Ncube, S. Sweeney, C. Fleischer, G. T. Mumba, M. M. Gill, S. K. M. Wall, W. Kilembe, M. Inambao, Y. N. Chen, M. McHoongo, L. Kimaru, Y. T. Hammond, T. Sharkey, K. Malama, T. R. Fulton, A. Tran, H. J. M. Zulu, A. K. Hurtig, J. Kinsman and C. Michelo | 2015 | A Multifaceted Strategy to Implement Brief Smoking Cessation Counseling During Antenatal Care in Argentina and Uruguay: A Cluster Establishing smoke-free hospitals in Vietnam: A pilot project                                                                                                                                                                                                                                      | Nicotine and Tobacco Research<br>Global Public Health                                                                                                           |
| S. Bosomprah, L. B. Beach, L. K. Beres, J. Newman, K. Kapasa, C. Rudd, L. Njobvu, B. Guffey, S. K. D. Shelley, Y. W. Belete, S. C. Phiri, M. Musonda, E. C. Kawesha, E. M. Muleya, C. P. W. Mavhu, N. Larke, K. Hatzold, G. Ncube, H. A. Weiss, C. Mangenah, O. Mugurungi, J. M. Abas, T. Bowers, E. Manda, S. Cooper, D. Machando, R. Verhey, N. Lamech, R. Araya and D. Chibanda                                                                                                                                                     | 2015 | Implementing tobacco use treatment guidelines in community Introduction of syphilis point-of-care tests, from pilot study to national programme                                                                                                                                                                                                                                                                                      | Implementation Science                                                                                                                                          |
| R. Buzdugan, M. S. K. Dufour, S. I. McCoy, C. Watadzaushe, J. Dirawo, A. Mushavi, H. A. Mujuru, A. Mahomva, R. A.                                                                                                                                                                                                                                                                                                                                                                                                                      | 2015 | implementation in Zambia: A Preliminary evaluation of Community-Led Total Sanitation for Scaling down to scale up: A health economic analysis of integrating point-of-care syphilis testing into Implementation of an electronic fingerprint-linked data collection system: A feasibility and acceptability study among Zambian female sex workers                                                                                   | PLoS ONE<br>Veterinary Parasitology                                                                                                                             |
|                                                                                                                                                                                                                                                                                                                                                                                                                                                                                                                                        | 2015 | Innovation in health service delivery: Integrating community Findings from a comprehensive diarrhoea prevention and treatment programme in Lusaka, Zambia                                                                                                                                                                                                                                                                            | PLoS ONE                                                                                                                                                        |
|                                                                                                                                                                                                                                                                                                                                                                                                                                                                                                                                        | 2015 | Implementation of the Community Health Assistant (CHA) Cadre in Zambia: A Process Evaluation to Implementation and Operational Research: A Randomized Noninferiority Trial of AccuCirc 'Opening up the mind': Problem-solving therapy delivered by female lay health workers to improve access to evidence-based care for Option A improved HIV-free infant survival and mother to child HIV transmission at 9-18 months in Zimbabwe | Globalization and Health<br>BMC Health Services Research<br>BMC Public Health<br>Journal of Community Health<br>Journal of Acquired Immune Deficiency Syndromes |
|                                                                                                                                                                                                                                                                                                                                                                                                                                                                                                                                        | 2016 |                                                                                                                                                                                                                                                                                                                                                                                                                                      | International Journal of Mental Health Systems                                                                                                                  |
|                                                                                                                                                                                                                                                                                                                                                                                                                                                                                                                                        | 2016 |                                                                                                                                                                                                                                                                                                                                                                                                                                      | AIDS                                                                                                                                                            |

J. DeCelles, R. B. Hershow, Z. A. Kaufman, K. R. Gannett, T.

2016 Process evaluation of a sport-based voluntary medical male Health systems research for policy change: Lessons from the

Journal of Acquired Immune Deficiency

D. Beran, J. J. Miranda, M. K. Cardenas and M. Bigdeli

2015 implementation of rapid assessment

Health Research Policy and Systems

J. Adams, R. J. McNaughton, S. Wigham, D. Flynn, L. Ternent and J. Shucksmith

2016 Acceptability of parental financial incentives and quasi-mandatory interventions for preschool

PLoS ONE
