# Supplementary material for: How is implementation research applied to advance health in low-income and middle-income countries?
Source: PubMed Central journal article supplement — BMJ Glob Health. 2019 Mar 7;4(2):e001257. doi: 10.1136/bmjgh-2018-001257 (PMC6441291; doi:10.1136/bmjgh-2018-001257), 2019-03-07
Supplement: bmjgh-2018-001257supp003.pdf [file bmjgh-2018-001257supp003.pdf]

## How is Implementation Research and Delivery Science (IRDS) applied in health in low and middle-income countries: A synthesis of the literature

### Supplementary File 3: Links to publications selected for in-depth review

Ansbro, É.M., Gill, M.M., Reynolds, J., Shelley, K.D., Strasser, S., Sripipatana, T., Ncube, A.T., Mumba, G.T., Terris-Prestholt, F., Peeling, R.W. and Mabey, D., 2015. Introduction of syphilis point-of-care tests, from pilot study to national programme implementation in Zambia: a qualitative study of healthcare workers' perspectives on testing, training and quality assurance. *PloS one*, 10(6), p.e0127728.

<http://journals.plos.org/plosone/article?id=10.1371/journal.pone.0127728>

Abramsky, T., Devries, K., Kiss, L., Francisco, L., Nakuti, J., Musuya, T., ... & Watts, C. (2012). A community mobilisation intervention to prevent violence against women and reduce HIV/AIDS risk in Kampala, Uganda (the SASA! Study): study protocol for a cluster randomised controlled trial. *Trials*, 13(1), 1. <http://trialsjournal.biomedcentral.com/articles/10.1186/1745-6215-13-96>

Babiarz, K.S., Mahadevan, S.V., Divi, N. and Miller, G., 2016. Ambulance Service Associated With Reduced Probabilities Of Neonatal And Infant Mortality In Two Indian States. *Health Affairs*, 35(10), pp.1774-1782. <http://content.healthaffairs.org/content/35/10/1774.full>

Belaid, L. and Ridde, V., 2014. Contextual factors as a key to understanding the heterogeneity of effects of a maternal health policy in Burkina Faso?. *Health policy and planning*, 30(3), pp.309-321. <https://academic.oup.com/heapol/article/30/3/309/616756/Contextual-factors-as-a-key-to-understanding-the>

Brune, N. E., & Bossert, T. (2009). Building social capital in post-conflict communities: Evidence from Nicaragua. *Social Science & Medicine*, 68(5), 885-893.

<http://www.sciencedirect.com/science/article/pii/S0277953608006680>

Bernabe-Ortiz, A., Diez-Canseco, F., Gilman, R. H., Cárdenas, M. K., Sacksteder, K. A., & Miranda, J. J. (2014). Launching a salt substitute to reduce blood pressure at the population level: a cluster randomized stepped wedge trial in Peru. *Trials*, 15(1), 1.

<http://trialsjournal.biomedcentral.com/articles/10.1186/1745-6215-15-93>

Carlo, W. A., McClure, E. M., Chomba, E., Chakraborty, H., Hartwell, T., Harris, H., ... & Wright, L. L. (2010). Newborn care training of midwives and neonatal and perinatal mortality rates in a developing country. *Pediatrics*, 126(5), e1064-e1071.

<http://pediatrics.aappublications.org/content/126/5/e1064>

Christensen, G., Dentz, H.N., Pickering, A.J., Bourdier, T., Arnold, B.F., Colford Jr, J.M. and Null, C., 2015. Pilot cluster randomized controlled trials to evaluate adoption of water, sanitation, and hygiene interventions and their combination in rural western Kenya. *The American journal of tropical medicine and hygiene*, 92(2), pp.437-447.

<http://www.ajtmh.org/docserver/fulltext/14761645/92/2/437.pdf?expires=1503344149&id=id&accname=guest&checksum=0844FCFBE8FB8B9CE8A91FC2006548C6>

Church, K., Wringe, A., Lewin, S., Ploubidis, G.B., Fakudze, P., Mayhew, S.H. and Integra Initiative, 2015. Exploring the feasibility of service integration in a low-income setting: a mixed methods investigation into different models of reproductive health and HIV care in

Swaziland. *PloS one*, 10(5), p.e0126144.

<http://journals.plos.org/plosone/article?id=10.1371/journal.pone.0126144>

Cooper, C.M., Fields, R., Mazzeo, C.I., Taylor, N., Pfitzer, A., Momolu, M. and Jabbeh-Howe, C., 2015. Successful proof of concept of family planning and immunization integration in Liberia. *Global Health: Science and Practice*, 3(1), pp.71-84.

<http://www.ghspjournal.org/content/3/1/71.full>

DeCelles, J., Hershow, R.B., Kaufman, Z.A., Gannett, K.R., Kombandeya, T., Chaibva, C., Ross, D.A. and Harrison, A., 2016. Process Evaluation of a Sport-Based Voluntary Medical Male Circumcision Demand-Creation Intervention in Bulawayo, Zimbabwe. *Journal of acquired immune deficiency syndromes (1999)*, 72(Suppl 4), p.S304.

<https://www.ncbi.nlm.nih.gov/pmc/articles/PMC5054959/>

Findley, S. E., Uwemedimo, O. T., Doctor, H. V., Green, C., Adamu, F., & Afenyadu, G. Y. (2013). Early results of an integrated maternal, newborn, and child health program, Northern Nigeria, 2009 to 2011. *BMC public health*, 13(1), 1.

<http://bmcpublichealth.biomedcentral.com/articles/10.1186/1471-2458-13-1034>

Georgeu, D., Colvin, C. J., Lewin, S., Fairall, L., Bachmann, M. O., Uebel, K., ... & Bateman, E. D. (2012). Implementing nurse-initiated and managed antiretroviral treatment (NIMART) in South Africa: a qualitative process evaluation of the STRETCH trial. *Implementation Science*, 7(1), 1. <http://implementationscience.biomedcentral.com/articles/10.1186/1748-5908-7-66>

Hirschhorn, L.R., Semrau, K., Kodkany, B., Churchill, R., Kapoor, A., Spector, J., Ringer, S., Firestone, R., Kumar, V. and Gawande, A., 2015. Learning before leaping: integration of an adaptive study design process prior to initiation of BetterBirth, a large-scale randomized controlled trial in Uttar Pradesh, India. *Implementation Science*, 10(1), p.117.

<https://implementationscience.biomedcentral.com/articles/10.1186/s13012-015-0309-y>

Hopkins, A. D. (1998). Mectizan delivery systems in the Central African Republic and cost recovery. *Annals of tropical medicine and parasitology*, 92(Supplement 1), 97-100.

<http://www.ingentaconnect.com/content/routledg/catm/1998/00000092/A00103s1/art00014>

Kim, M.H., Ahmed, S., Hosseinipour, M.C., Giordano, T.P., Chiao, E.Y., Yu, X., Nguyen, C., Chimbwandira, F., Kazembe, P.N. and Abrams, E.J., 2015. Implementation and operational research: the impact of option B+ on the antenatal PMTCT cascade in Lilongwe, Malawi. *Journal of acquired immune deficiency syndromes (1999)*, 68(5), p.e77.

<https://www.ncbi.nlm.nih.gov/pmc/articles/PMC4359035/>

Liao, S., Weeks, M. R., Wang, Y., Li, F., Jiang, J., Li, J., ... & Dunn, J. (2011). Female condom use in the rural sex industry in China: analysis of users and non-users at post-intervention surveys. *AIDS care*, 23(sup1), 66-74.

<http://www.tandfonline.com/doi/abs/10.1080/09540121.2011.555742>

Mavhu, W., Larke, N., Hatzold, K., Ncube, G., Weiss, H.A., Mangenah, C., Mugurungi, O., Mufuka, J., Samkange, C.A., Sherman, J. and Gwinji, G., 2015. Implementation and operational research: a randomized noninferiority trial of AccuCirc device versus Mogen clamp for early infant male circumcision in Zimbabwe. *Journal of acquired immune deficiency syndromes (1999)*, 69(5), p.e156. <https://www.ncbi.nlm.nih.gov/pmc/articles/PMC4508202/>

- McDougal, L., Moteetee, M. M., Mohai, F., Mphale, M., Mahanty, B., Motaung, B., ... & Luo, C. (2012). Lesotho's Minimum PMTCT Package: lessons learned for combating vertical HIV transmission using co-packaged medicines. *Journal of the International AIDS Society*, 15(2). <http://www.jiasociety.org/index.php/jias/article/view/17326>
- Miri, E. S. (1998). Problems and perspectives onchocerciasis control programme: a case study from Plateau state, Nigeria of managing an. *Annals of tropical medicine and parasitology*, 92(3), 121-128. <http://www.ingentaconnect.com/content/routledg/catm/1998/00000092/a00103s1/art00017>
- Nahar, T., Azad, K., Aumon, B. H., Younes, L., Shaha, S., Kuddus, A., ... & Fottrell, E. (2012). Scaling up community mobilisation through women's groups for maternal and neonatal health: experiences from rural Bangladesh. *BMC pregnancy and childbirth*, 12(1), 1. <https://bmcpregnancychildbirth.biomedcentral.com/articles/10.1186/1471-2393-12-5>
- Ngana, F. R., Myers, B. A., & Belton, S. (2012). Health reporting system in two subdistricts in Eastern Indonesia: Highlighting the role of village midwives. *Midwifery*, 28(6), 809-815. <http://www.sciencedirect.com/science/article/pii/S0266613811001380>
- Ozawa, S., Singh, S., Singh, K., Chhabra, V. and Bennett, S., 2016. The Avahan transition: effects of transition readiness on program institutionalization and sustained outcomes. *PloS one*, 11(7), p.e0158659. <http://journals.plos.org/plosone/article?id=10.1371/journal.pone.0158659>
- Rajaraman, D., Travasso, S., Chatterjee, A., Bhat, B., Andrew, G., Parab, S., & Patel, V. (2012). The acceptability, feasibility and impact of a lay health counsellor delivered health promoting schools programme in India: a case study evaluation. *BMC health services research*, 12(1), 1. <http://bmchealthservres.biomedcentral.com/articles/10.1186/1472-6963-12-127>
- Shei, A. (2013). Brazil's conditional cash transfer program associated with declines in infant mortality rates. *Health Affairs*, 32(7), 1274-1281. <http://content.healthaffairs.org/content/32/7/1274.short>
- Shelley, D., VanDevanter, N., Cleland, C.C., Nguyen, L. and Nguyen, N., 2015. Implementing tobacco use treatment guidelines in community health centers in Vietnam. *Implementation Science*, 10(1), p.142. <https://implementationscience.biomedcentral.com/articles/10.1186/s13012-015-0328-8>
- Sherr, K., Cuembelo, F., Michel, C., Gimbel, S., Micek, M., Kariaganis, M., ... & Gloyd, S. (2013). Strengthening integrated primary health care in Sofala, Mozambique. *BMC Health Services Research*, 13(Suppl 2), S4. <http://old.biomedcentral.com/1472-6963/13/S2/S4/>
- Shrestha, S., Petrini, M., & Turale, S. (2013). Newborn care in Nepal: the effects of an educational intervention on nurses' knowledge and practice. *International nursing review*, 60(2), 205-211. <http://onlinelibrary.wiley.com/doi/10.1111/inr.12017/full>
- Teklehaimanot, H. D., & Teklehaimanot, A. (2013). Human resource development for a community-based health extension program: a case study from Ethiopia. *Human resources for health*, 11(1), 1. <http://human-resources-health.biomedcentral.com/articles/10.1186/1478-4491-11-39>
